# Supplementary material for: Legionella shows a diverse secondary metabolism dependent on a broad spectrum Sfp-type phosphopantetheinyl transferase
Source: PeerJ. 2016 Nov 24;4:e2720. doi: 10.7717/peerj.2720 (PMC5126622; doi:10.7717/peerj.2720)
Supplement: Supplemental Information 1 — All ortholog families for the 15 analysed Legionella strains. Shown are the protein accession numbers for species available in the NCBI database. For L. parisiensis, locus tags are indicated. Annotated functions in each species are also shown. [file peerj-04-2720-s001.xlsx]

## Sheet: Sheet1
Supplementary Table 1. All ortholog families for the 15 analysed Legionella strains. Shown are the protein accession numbers for species available in the NCBI database. For L. parisiensis, locus tags are indicated. Annotated functions in each species are also shown.
Legionella oakridgensis	Legionella parisiensis	Legionella geestiana	Legionella norrlandica	Legionella fairfieldensis	Legionella lansingensis	Legionella shakespearei	Legionella wadworthii	Legionella pneumophila	Legionella drancourtii	Legionella anisa	Legionella cherii	Legionella moravica	Legionella longbeacheae	Legionella sainthelensis	Annotated Legionella oakridgensis	Annotated Legionella parisiensis	Annotated Legionella geestiana	Annotated Legionella norrlandicas	Annotated Legionella fairfieldensis	Annotated Legionella lansingensis	Annotated Legionella shakespearei	Annotated Legionella wadworthii	Annotated Legionella pneumophila	Annotated Legionella drancourtii	Annotated Legionella anisa	Annotated Legionella cherii	Annotated Legionella moravica	Annotated Legionella longbeacheae	Annotated Legionella sainthelensis
WP_025384606.1	lpari_00339	WP_028385800.1	WP_035887980.1	WP_028389370.1	WP_028372498.1	WP_018576717.1	WP_031566772.1	YP_094057.1	WP_006869473.1	WP_019232683.1	WP_028381435.1	WP_028382936.1	WP_003633850.1	WP_027270368.1	DNA polymerase III subunit beta [Legionella oakridgensis]	DNA polymerase III subunit beta	DNA polymerase III subunit beta [Legionella geestiana]	DNA polymerase III subunit beta [Legionella norrlandica]	DNA polymerase III subunit beta [Legionella fairfieldensis]	DNA polymerase III subunit beta [Legionella lansingensis]	DNA polymerase III subunit beta [Legionella shakespearei]	DNA polymerase III subunit beta [Legionella wadsworthii]	DNA polymerase III beta chain [Legionella pneumophila subsp. pneumophila str. Philadelphia 1]	DNA polymerase III subunit beta [Legionella drancourtii]	DNA polymerase III subunit beta [Legionella anisa]	DNA polymerase III subunit beta [Legionella cherrii]	DNA polymerase III subunit beta [Legionella moravica]	DNA polymerase III subunit beta [Legionella longbeachae]	DNA polymerase III subunit beta [Legionella sainthelensi]
WP_025384610.1	lpari_01943	WP_028385798.1	WP_035887982.1	WP_028389368.1	WP_028372499.1	WP_018576721.1	WP_031566777.1	YP_094059.1	WP_006869469.1	WP_019232685.1	WP_028381433.1	WP_028382938.1	WP_003633846.1	WP_027270366.1	DNA gyrase subunit B [Legionella oakridgensis]	DNA gyrase subunit B	DNA gyrase subunit B [Legionella geestiana]	DNA gyrase subunit B [Legionella norrlandica]	DNA gyrase subunit B [Legionella fairfieldensis]	DNA gyrase subunit B [Legionella lansingensis]	DNA gyrase subunit B [Legionella shakespearei]	DNA gyrase subunit B [Legionella wadsworthii]	DNA gyrase subunit B [Legionella pneumophila subsp. pneumophila str. Philadelphia 1]	DNA gyrase subunit B [Legionella drancourtii]	DNA gyrase subunit B [Legionella anisa]	DNA gyrase subunit B [Legionella cherrii]	DNA gyrase subunit B [Legionella moravica]	DNA gyrase subunit B [Legionella longbeachae]	DNA gyrase subunit B [Legionella sainthelensi]
WP_025384620.1	lpari_01936	WP_051550811.1	WP_035887991.1	WP_028389366.1	WP_028372502.1	WP_018576728.1	WP_031566793.1	YP_094065.1	WP_006869462.1	WP_019232693.1	WP_028381425.1	WP_028382946.1	WP_003633820.1	WP_027270355.1	GTPase HflX [Legionella oakridgensis]	GTPase HflX	GTPase HflX [Legionella geestiana]	GTPase HflX [Legionella norrlandica]	GTPase HflX [Legionella fairfieldensis]	GTPase HflX [Legionella lansingensis]	GTPase HflX [Legionella shakespearei]	GTPase HflX [Legionella wadsworthii]	GTP binding protein HflX [Legionella pneumophila subsp. pneumophila str. Philadelphia 1]	GTPase HflX [Legionella drancourtii]	GTPase HflX [Legionella anisa]	GTPase HflX [Legionella cherrii]	GTPase HflX [Legionella moravica]	GTPase HflX [Legionella longbeachae]	GTPase HflX [Legionella sainthelensi]
WP_025384659.1	lpari_01925	WP_028385846.1	WP_035888002.1	WP_028389360.1	WP_028372510.1	WP_018577787.1	WP_031566810.1	YP_094076.1	WP_006869454.1	WP_019232707.1	WP_028381414.1	WP_028382953.1	WP_003633785.1	WP_027272197.1	hypothetical protein [Legionella oakridgensis]	hypothetical protein	hypothetical protein [Legionella geestiana]	hypothetical protein [Legionella norrlandica]	hypothetical protein [Legionella fairfieldensis]	hypothetical protein [Legionella lansingensis]	hypothetical protein [Legionella shakespearei]	hypothetical protein [Legionella wadsworthii]	hypothetical protein lpg0021 [Legionella pneumophila subsp. pneumophila str. Philadelphia 1]	hypothetical protein [Legionella drancourtii]	hypothetical protein [Legionella anisa]	hypothetical protein [Legionella cherrii]	hypothetical protein [Legionella moravica]	hypothetical protein [Legionella longbeachae]	hypothetical protein [Legionella sainthelensi]
WP_025384665.1	lpari_03453	WP_028385840.1	WP_035887928.1	WP_035918951.1	WP_028372421.1	WP_026253888.1	WP_031566725.1	YP_096972.1	WP_006870129.1	WP_019232655.1	WP_028381472.1	WP_035921136.1	WP_003633931.1	WP_027270449.1	DNA topoisomerase IV subunit A [Legionella oakridgensis]	DNA topoisomerase 4 subunit A	DNA topoisomerase IV subunit A [Legionella geestiana]	DNA topoisomerase IV subunit A [Legionella norrlandica]	DNA topoisomerase IV subunit A [Legionella fairfieldensis]	DNA topoisomerase IV subunit A [Legionella lansingensis]	DNA topoisomerase IV subunit A [Legionella shakespearei]	DNA topoisomerase IV subunit A [Legionella wadsworthii]	DNA topoisomerase IV subunit A [Legionella pneumophila subsp. pneumophila str. Philadelphia 1]	DNA topoisomerase IV subunit A [Legionella drancourtii]	DNA topoisomerase IV subunit A [Legionella anisa]	DNA topoisomerase IV subunit A [Legionella cherrii]	DNA topoisomerase IV subunit A [Legionella moravica]	DNA topoisomerase IV subunit A [Legionella longbeachae]	DNA topoisomerase IV subunit A [Legionella sainthelensi]
WP_025384668.1	lpari_02419	WP_028385572.1	WP_035890223.1	WP_028388762.1	WP_028372469.1	WP_018577876.1	WP_031566640.1	YP_094131.1	WP_006870062.1	WP_019232593.1	WP_028381520.1	WP_028384016.1	WP_003634079.1	WP_027270494.1	proline aminopeptidase P II [Legionella oakridgensis]	Xaa-Pro aminopeptidase	proline aminopeptidase P II [Legionella geestiana]	proline aminopeptidase P II [Legionella norrlandica]	proline aminopeptidase P II [Legionella fairfieldensis]	proline aminopeptidase P II [Legionella lansingensis]	proline aminopeptidase P II [Legionella shakespearei]	proline aminopeptidase P II [Legionella wadsworthii]	hypothetical protein lpg0077 [Legionella pneumophila subsp. pneumophila str. Philadelphia 1]	proline aminopeptidase P II [Legionella drancourtii]	proline aminopeptidase P II [Legionella anisa]	proline aminopeptidase P II [Legionella cherrii]	proline aminopeptidase P II [Legionella moravica]	proline aminopeptidase P II [Legionella longbeachae]	proline aminopeptidase P II [Legionella sainthelensi]
WP_025384669.1	lpari_02417	WP_028385570.1	WP_035890174.1	WP_028388760.1	WP_028372467.1	WP_018577878.1	WP_031566637.1	YP_094133.1	WP_040534507.1	WP_019232591.1	WP_028381522.1	WP_028384014.1	WP_003634086.1	WP_027270496.1	2-polyprenyl-6-methoxyphenol hydroxylase [Legionella oakridgensis]	2-octaprenylphenol hydroxylase	2-polyprenyl-6-methoxyphenol hydroxylase [Legionella geestiana]	2-polyprenyl-6-methoxyphenol hydroxylase [Legionella norrlandica]	2-polyprenyl-6-methoxyphenol hydroxylase [Legionella fairfieldensis]	2-polyprenyl-6-methoxyphenol hydroxylase [Legionella lansingensis]	hypothetical protein [Legionella shakespearei]	2-polyprenyl-6-methoxyphenol hydroxylase [Legionella wadsworthii]	2-polyprenyl-6-methoxyphenol 4-hydroxylase [Legionella pneumophila subsp. pneumophila str. Philadelphia 1]	2-polyprenyl-6-methoxyphenol hydroxylase [Legionella drancourtii]	2-polyprenyl-6-methoxyphenol 4-hydroxylase [Legionella anisa]	2-polyprenyl-6-methoxyphenol hydroxylase [Legionella cherrii]	2-polyprenyl-6-methoxyphenol hydroxylase [Legionella moravica]	2-polyprenyl-6-methoxyphenol 4-hydroxylase [Legionella longbeachae]	2-polyprenyl-6-methoxyphenol hydroxylase [Legionella sainthelensi]
WP_025384671.1	lpari_02412	WP_028385785.1	WP_035890182.1	WP_028388969.1	WP_028372845.1	WP_018577879.1	WP_031566631.1	YP_094137.1	WP_006870059.1	WP_019232586.1	WP_028381524.1	WP_028384011.1	WP_003634100.1	WP_027270499.1	alpha-L-glutamate ligase [Legionella oakridgensis]	Ribosomal protein S6--L-glutamate ligase	alpha-L-glutamate ligase [Legionella geestiana]	alpha-L-glutamate ligase [Legionella norrlandica]	alpha-L-glutamate ligase [Legionella fairfieldensis]	alpha-L-glutamate ligase [Legionella lansingensis]	alpha-L-glutamate ligase [Legionella shakespearei]	alpha-L-glutamate ligase [Legionella wadsworthii]	glutathione synthase/ribosomal protein S6 modification protein [Legionella pneumophila subsp. pneumophila str. Philadelphia 1]	alpha-L-glutamate ligase [Legionella drancourtii]	alpha-L-glutamate ligase [Legionella anisa]	alpha-L-glutamate ligase [Legionella cherrii]	alpha-L-glutamate ligase [Legionella moravica]	alpha-L-glutamate ligase [Legionella longbeachae]	alpha-L-glutamate ligase [Legionella sainthelensi]
WP_025384672.1	lpari_02411	WP_028385786.1	WP_035890183.1	WP_028388968.1	WP_028372844.1	WP_018577880.1	WP_031566630.1	YP_094138.1	WP_006870058.1	WP_019232585.1	WP_028381525.1	WP_028384010.1	WP_003634103.1	WP_027270500.1	membrane protein [Legionella oakridgensis]	hypothetical protein	membrane protein [Legionella geestiana]	membrane protein [Legionella norrlandica]	membrane protein [Legionella fairfieldensis]	membrane protein [Legionella lansingensis]	membrane protein [Legionella shakespearei]	membrane protein [Legionella wadsworthii]	hypothetical protein lpg0084 [Legionella pneumophila subsp. pneumophila str. Philadelphia 1]	membrane protein [Legionella drancourtii]	membrane protein [Legionella anisa]	membrane protein [Legionella cherrii]	membrane protein [Legionella moravica]	membrane protein [Legionella longbeachae]	membrane protein [Legionella sainthelensi]
WP_025384673.1	lpari_02410	WP_028385787.1	WP_035890184.1	WP_028388967.1	WP_028372843.1	WP_026253994.1	WP_031566629.1	YP_094139.1	WP_006870057.1	WP_019232584.1	WP_028381526.1	WP_028384009.1	WP_003634105.1	WP_027270501.1	hypothetical protein [Legionella oakridgensis]	hypothetical protein	hypothetical protein [Legionella geestiana]	hypothetical protein [Legionella norrlandica]	hypothetical protein [Legionella fairfieldensis]	hypothetical protein [Legionella lansingensis]	hypothetical protein [Legionella shakespearei]	hypothetical protein [Legionella wadsworthii]	hypothetical protein lpg0085 [Legionella pneumophila subsp. pneumophila str. Philadelphia 1]	hypothetical protein [Legionella drancourtii]	hypothetical protein [Legionella anisa]	hypothetical protein [Legionella cherrii]	hypothetical protein [Legionella moravica]	hypothetical protein [Legionella longbeachae]	hypothetical protein [Legionella sainthelensi]
WP_025384674.1	lpari_02409	WP_028385791.1	WP_035890185.1	WP_051555207.1	WP_051546115.1	WP_018577882.1	WP_031566628.1	YP_094140.1	WP_050805522.1	WP_019232583.1	WP_028381527.1	WP_028384008.1	WP_003634107.1	WP_027270502.1	hypothetical protein [Legionella oakridgensis]	hypothetical protein	hypothetical protein [Legionella geestiana]	hypothetical protein [Legionella norrlandica]	hypothetical protein [Legionella fairfieldensis]	hypothetical protein [Legionella lansingensis]	hypothetical protein [Legionella shakespearei]	membrane protein [Legionella wadsworthii]	hypothetical protein lpg0086 [Legionella pneumophila subsp. pneumophila str. Philadelphia 1]	hypothetical protein [Legionella drancourtii]	hypothetical protein [Legionella anisa]	membrane protein [Legionella cherrii]	hypothetical protein [Legionella moravica]	membrane protein [Legionella longbeachae]	membrane protein [Legionella sainthelensi]
WP_025384676.1	lpari_02405	WP_028385793.1	WP_035890207.1	WP_028388963.1	WP_028372834.1	WP_018577887.1	WP_031566624.1	YP_094145.1	WP_006870053.1	WP_019232579.1	WP_028381531.1	WP_028384004.1	WP_003634114.1	WP_027270506.1	hypothetical protein [Legionella oakridgensis]	hypothetical protein	hypothetical protein [Legionella geestiana]	hypothetical protein [Legionella norrlandica]	hypothetical protein [Legionella fairfieldensis]	hypothetical protein [Legionella lansingensis]	hypothetical protein [Legionella shakespearei]	hypothetical protein [Legionella wadsworthii]	hypothetical protein lpg0091 [Legionella pneumophila subsp. pneumophila str. Philadelphia 1]	hypothetical protein [Legionella drancourtii]	hypothetical protein [Legionella anisa]	hypothetical protein [Legionella cherrii]	hypothetical protein [Legionella moravica]	hypothetical protein [Legionella longbeachae]	hypothetical protein [Legionella sainthelensi]
WP_025384678.1	lpari_02402	WP_028385795.1	WP_035890209.1	WP_028388961.1	WP_035915187.1	WP_018577889.1	WP_031566620.1	YP_094147.1	WP_006870050.1	WP_019232576.1	WP_028381533.1	WP_028384002.1	WP_003634117.1	WP_027270508.1	23S rRNA methyltransferase [Legionella oakridgensis]	23S rRNA (guanosine-2'-O-)-methyltransferase RlmB	23S rRNA methyltransferase [Legionella geestiana]	23S rRNA methyltransferase [Legionella norrlandica]	23S rRNA methyltransferase [Legionella fairfieldensis]	23S rRNA methyltransferase [Legionella lansingensis]	23S rRNA (guanosine-2'-O-)-methyltransferase [Legionella shakespearei]	23S rRNA methyltransferase [Legionella wadsworthii]	tRNA/rRNA methyltransferase [Legionella pneumophila subsp. pneumophila str. Philadelphia 1]	23S rRNA (guanosine-2'-O-)-methyltransferase [Legionella drancourtii]	23S rRNA (guanosine-2'-O-)-methyltransferase [Legionella anisa]	23S rRNA methyltransferase [Legionella cherrii]	23S rRNA methyltransferase [Legionella moravica]	23S rRNA (guanosine-2'-O-)-methyltransferase [Legionella longbeachae]	23S rRNA methyltransferase [Legionella sainthelensi]
WP_025384679.1	lpari_01914	WP_028386213.1	WP_035887913.1	WP_028388960.1	WP_028372830.1	WP_018576680.1	WP_031566829.1	YP_096961.1	WP_006869441.1	WP_040522162.1	WP_028381403.1	WP_028382889.1	WP_003633762.1	WP_027272207.1	acetylornithine aminotransferase [Legionella oakridgensis]	Acetylornithine aminotransferase	acetylornithine aminotransferase [Legionella geestiana]	acetylornithine aminotransferase [Legionella norrlandica]	acetylornithine aminotransferase [Legionella fairfieldensis]	acetylornithine aminotransferase [Legionella lansingensis]	acetylornithine aminotransferase [Legionella shakespearei]	acetylornithine aminotransferase [Legionella wadsworthii]	acetylornithine aminotransferase [Legionella pneumophila subsp. pneumophila str. Philadelphia 1]	acetylornithine aminotransferase [Legionella drancourtii]	acetylornithine aminotransferase [Legionella anisa]	acetylornithine aminotransferase [Legionella cherrii]	acetylornithine aminotransferase [Legionella moravica]	acetylornithine aminotransferase [Legionella longbeachae]	acetylornithine aminotransferase [Legionella sainthelensi]
WP_025384681.1	lpari_01911	WP_028386211.1	WP_035887911.1	WP_028388958.1	WP_028372828.1	WP_018576678.1	WP_031566833.1	YP_096959.1	WP_006869439.1	WP_019232721.1	WP_028381401.1	WP_028382887.1	WP_003633757.1	WP_027272210.1	glutaredoxin [Legionella oakridgensis]	Glutaredoxin-4	glutaredoxin [Legionella geestiana]	glutaredoxin [Legionella norrlandica]	glutaredoxin [Legionella fairfieldensis]	glutaredoxin [Legionella lansingensis]	glutaredoxin [Legionella shakespearei]	glutaredoxin [Legionella wadsworthii]	glutaredoxin-like protein [Legionella pneumophila subsp. pneumophila str. Philadelphia 1]	glutaredoxin [Legionella drancourtii]	glutaredoxin [Legionella anisa]	glutaredoxin [Legionella cherrii]	glutaredoxin [Legionella moravica]	glutaredoxin [Legionella longbeachae]	glutaredoxin [Legionella sainthelensi]
WP_025384682.1	lpari_01910	WP_028386210.1	WP_035887909.1	WP_028388957.1	WP_028372827.1	WP_018576677.1	WP_031566835.1	YP_096958.1	WP_006869438.1	WP_019232722.1	WP_028381400.1	WP_028382886.1	WP_003633755.1	WP_027272211.1	alkyl hydroperoxide reductase [Legionella oakridgensis]	putative peroxiredoxin	alkyl hydroperoxide reductase [Legionella geestiana]	alkyl hydroperoxide reductase [Legionella norrlandica]	alkyl hydroperoxide reductase [Legionella fairfieldensis]	alkyl hydroperoxide reductase [Legionella lansingensis]	peroxidase [Legionella shakespearei]	alkyl hydroperoxide reductase [Legionella wadsworthii]	AhpC/Tsa family peroxynitrite reductase [Legionella pneumophila subsp. pneumophila str. Philadelphia 1]	peroxidase [Legionella drancourtii]	peroxidase [Legionella anisa]	alkyl hydroperoxide reductase [Legionella cherrii]	alkyl hydroperoxide reductase [Legionella moravica]	peroxidase [Legionella longbeachae]	alkyl hydroperoxide reductase [Legionella sainthelensi]
WP_025384686.1	lpari_01903	WP_028385567.1	WP_035891264.1	WP_028388951.1	WP_028372822.1	WP_018578422.1	WP_031566845.1	YP_096952.1	WP_006869427.1	WP_019232730.1	WP_028382377.1	WP_028382878.1	WP_003633735.1,WP_003632098.1	WP_027272025.1,WP_027270295.1	hypothetical protein [Legionella oakridgensis]	hypothetical protein	hypothetical protein [Legionella geestiana]	hypothetical protein [Legionella norrlandica]	hypothetical protein [Legionella fairfieldensis]	hypothetical protein [Legionella lansingensis]	valyl-tRNA synthetase, partial [Legionella shakespearei]	hypothetical protein [Legionella wadsworthii]	hypothetical protein lpg2959 [Legionella pneumophila subsp. pneumophila str. Philadelphia 1]	hypothetical protein [Legionella drancourtii]	hypothetical protein [Legionella anisa]	hypothetical protein [Legionella cherrii]	hypothetical protein [Legionella moravica]	NA	NA
WP_025384688.1	lpari_01901	WP_028385909.1	WP_035891267.1	WP_028388948.1	WP_028372820.1	WP_018576002.1,WP_018578420.1	WP_031566848.1	YP_096950.1	WP_006869424.1	WP_019232732.1	WP_028382379.1	WP_028383396.1	WP_003633731.1	WP_027272023.1	membrane protein [Legionella oakridgensis]	Modulator of FtsH protease HflK	protease [Legionella geestiana]	membrane protein [Legionella norrlandica]	membrane protein [Legionella fairfieldensis]	membrane protein [Legionella lansingensis]	NA	membrane protein [Legionella wadsworthii]	stomatin like transmembrane protein [Legionella pneumophila subsp. pneumophila str. Philadelphia 1]	membrane protein [Legionella drancourtii]	membrane protein [Legionella anisa]	membrane protein [Legionella cherrii]	stomatin 2 [Legionella moravica]	membrane protein [Legionella longbeachae]	membrane protein [Legionella sainthelensi]
WP_025384690.1	lpari_01899	WP_028385566.1	WP_035891269.1	WP_028388947.1	WP_028372817.1	WP_018578418.1	WP_031566850.1	YP_096949.1	WP_040534156.1	WP_019232735.1	WP_028382382.1	WP_028382877.1	WP_012978729.1	WP_027272021.1	deoxycytidine triphosphate deaminase [Legionella oakridgensis]	Deoxycytidine triphosphate deaminase	deoxycytidine triphosphate deaminase [Legionella geestiana]	deoxycytidine triphosphate deaminase [Legionella norrlandica]	deoxycytidine triphosphate deaminase [Legionella fairfieldensis]	deoxycytidine triphosphate deaminase [Legionella lansingensis]	deoxycytidine triphosphate deaminase [Legionella shakespearei]	deoxycytidine triphosphate deaminase [Legionella wadsworthii]	deoxycytidine triphosphate deaminase [Legionella pneumophila subsp. pneumophila str. Philadelphia 1]	deoxycytidine triphosphate deaminase [Legionella drancourtii]	deoxycytidine triphosphate deaminase [Legionella anisa]	deoxycytidine triphosphate deaminase [Legionella cherrii]	deoxycytidine triphosphate deaminase [Legionella moravica]	deoxycytidine triphosphate deaminase [Legionella longbeachae]	deoxycytidine triphosphate deaminase [Legionella sainthelensi]
WP_025384691.1	lpari_01898	WP_028385565.1	WP_035891272.1	WP_028388946.1	WP_028372816.1	WP_026254042.1	WP_031566852.1	YP_096948.1	WP_006869422.1	WP_019232736.1	WP_028382383.1	WP_028382876.1	WP_012978730.1	WP_027272020.1	integration host factor subunit beta [Legionella oakridgensis]	Integration host factor subunit beta	integration host factor subunit beta [Legionella geestiana]	integration host factor subunit beta [Legionella norrlandica]	integration host factor subunit beta [Legionella fairfieldensis]	integration host factor subunit beta [Legionella lansingensis]	integration host factor subunit beta [Legionella shakespearei]	integration host factor subunit beta [Legionella wadsworthii]	integration host factor beta subunit [Legionella pneumophila subsp. pneumophila str. Philadelphia 1]	integration host factor subunit beta [Legionella drancourtii]	integration host factor subunit beta [Legionella anisa]	integration host factor subunit beta [Legionella cherrii]	integration host factor subunit beta [Legionella moravica]	integration host factor subunit beta [Legionella longbeachae]	integration host factor subunit beta [Legionella sainthelensi]
WP_025384692.1	lpari_01623	WP_051550990.1	WP_035886999.1	WP_028388943.1	WP_028372814.1	WP_018578082.1	WP_035899008.1	YP_096609.1	WP_040535031.1	WP_040522693.1	WP_028382330.1	WP_028382693.1	WP_003632649.1	WP_035906189.1	hypothetical protein [Legionella oakridgensis]	2-hydroxy-6-oxononadienedioate/2-hydroxy-6-oxononatrienedioate hydrolase	hypothetical protein [Legionella geestiana]	hypothetical protein [Legionella norrlandica]	hypothetical protein [Legionella fairfieldensis]	hypothetical protein [Legionella lansingensis]	hypothetical protein [Legionella shakespearei]	hypothetical protein [Legionella wadsworthii]	hypothetical protein lpg2604 [Legionella pneumophila subsp. pneumophila str. Philadelphia 1]	hypothetical protein [Legionella drancourtii]	hypothetical protein [Legionella anisa]	hypothetical protein [Legionella cherrii]	hypothetical protein [Legionella moravica]	hypothetical protein [Legionella longbeachae]	hypothetical protein [Legionella sainthelensi]
WP_025384697.1	lpari_01894	WP_028385560.1	WP_035891277.1	WP_028388941.1	WP_028372812.1	WP_018578413.1	WP_031566861.1	YP_096944.1	WP_006869417.1	WP_019232740.1	WP_028382386.1	WP_028382872.1	WP_003633718.1	WP_027272016.1	cystathionine beta-lyase [Legionella oakridgensis]	Cysteine synthase	cystathionine beta-lyase [Legionella geestiana]	cystathionine beta-lyase [Legionella norrlandica]	cystathionine beta-lyase [Legionella fairfieldensis]	cystathionine beta-lyase [Legionella lansingensis]	cysteine synthase [Legionella shakespearei]	cystathionine beta-lyase [Legionella wadsworthii]	cystathionine beta-lyase [Legionella pneumophila subsp. pneumophila str. Philadelphia 1]	cystathionine beta-lyase [Legionella drancourtii]	cysteine synthase [Legionella anisa]	cystathionine beta-lyase [Legionella cherrii]	cystathionine beta-lyase [Legionella moravica]	cystathionine beta-lyase [Legionella longbeachae]	cystathionine beta-lyase [Legionella sainthelensi]
WP_025384702.1	lpari_02392	WP_028385583.1	WP_035890297.1	WP_028388844.1	WP_028372351.1	WP_018577896.1	WP_031566608.1	YP_094153.1	WP_040534503.1	WP_019232564.1	WP_028381543.1	WP_028385477.1	WP_003634137.1	WP_027270517.1	DNA polymerase I [Legionella oakridgensis]	DNA polymerase I	DNA polymerase I [Legionella geestiana]	DNA polymerase I [Legionella norrlandica]	DNA polymerase I [Legionella fairfieldensis]	DNA polymerase I [Legionella lansingensis]	DNA polymerase I [Legionella shakespearei]	DNA polymerase I [Legionella wadsworthii]	DNA polymerase I [Legionella pneumophila subsp. pneumophila str. Philadelphia 1]	DNA polymerase I [Legionella drancourtii]	DNA polymerase I [Legionella anisa]	DNA polymerase I [Legionella cherrii]	DNA polymerase I [Legionella moravica]	DNA polymerase I [Legionella longbeachae]	DNA polymerase I [Legionella sainthelensi]
WP_025384703.1	lpari_02391	WP_028385582.1	WP_035890298.1	WP_028388843.1	WP_028372350.1	WP_018577897.1	WP_031566607.1	YP_094154.1	WP_006870044.1	WP_019232563.1	WP_028381544.1	WP_028385476.1	WP_003634138.1	WP_027270518.1	UDP-3-O-(3-hydroxymyristoyl) glucosamine N-acyltransferase [Legionella oakridgensis]	UDP-3-O-acylglucosamine N-acyltransferase	UDP-3-O-(3-hydroxymyristoyl) glucosamine N-acyltransferase [Legionella geestiana]	UDP-3-O-(3-hydroxymyristoyl) glucosamine N-acyltransferase [Legionella norrlandica]	UDP-3-O-(3-hydroxymyristoyl) glucosamine N-acyltransferase [Legionella fairfieldensis]	UDP-3-O-(3-hydroxymyristoyl) glucosamine N-acyltransferase [Legionella lansingensis]	UDP-3-O-(3-hydroxymyristoyl) glucosamine N-acyltransferase [Legionella shakespearei]	UDP-3-O-(3-hydroxymyristoyl) glucosamine N-acyltransferase [Legionella wadsworthii]	UDP-3-O-[3-hydroxymyristoyl] glucosamine N-acyltransferase [Legionella pneumophila subsp. pneumophila str. Philadelphia 1]	UDP-3-O-(3-hydroxymyristoyl) glucosamine N-acyltransferase [Legionella drancourtii]	UDP-3-O-(3-hydroxymyristoyl) glucosamine N-acyltransferase [Legionella anisa]	UDP-3-O-(3-hydroxymyristoyl) glucosamine N-acyltransferase [Legionella cherrii]	UDP-3-O-(3-hydroxymyristoyl) glucosamine N-acyltransferase [Legionella moravica]	UDP-3-O-(3-hydroxymyristoyl) glucosamine N-acyltransferase [Legionella longbeachae]	UDP-3-O-(3-hydroxymyristoyl) glucosamine N-acyltransferase [Legionella sainthelensi]
WP_025384705.1	lpari_02386	WP_028385630.1	WP_035890312.1	WP_028388838.1	WP_028372343.1	WP_026253995.1	WP_031566602.1	YP_094161.1	WP_006870025.1	WP_019232559.1	WP_028381549.1	WP_028385468.1	WP_003634146.1	WP_027270522.1	hypothetical protein [Legionella oakridgensis]	hypothetical protein	hypothetical protein [Legionella geestiana]	hypothetical protein [Legionella norrlandica]	hypothetical protein [Legionella fairfieldensis]	hypothetical protein [Legionella lansingensis]	hypothetical protein [Legionella shakespearei]	hypothetical protein [Legionella wadsworthii]	hypothetical protein lpg0107 [Legionella pneumophila subsp. pneumophila str. Philadelphia 1]	hypothetical protein [Legionella drancourtii]	hypothetical protein [Legionella anisa]	hypothetical protein [Legionella cherrii]	hypothetical protein [Legionella moravica]	hypothetical protein [Legionella longbeachae]	hypothetical protein [Legionella sainthelensi]
WP_025384706.1	lpari_02385	WP_028385631.1	WP_035890340.1	WP_028388837.1	WP_028372342.1	WP_018577904.1	WP_031566600.1	YP_094163.1	WP_006870024.1	WP_040522070.1	WP_028381550.1	WP_028385467.1	WP_003634147.1	WP_027270523.1	hypothetical protein [Legionella oakridgensis]	hypothetical protein	hypothetical protein [Legionella geestiana]	hypothetical protein [Legionella norrlandica]	hypothetical protein [Legionella fairfieldensis]	hypothetical protein [Legionella lansingensis]	hypothetical protein [Legionella shakespearei]	hypothetical protein [Legionella wadsworthii]	hypothetical protein lpg0109 [Legionella pneumophila subsp. pneumophila str. Philadelphia 1]	hypothetical protein [Legionella drancourtii]	hypothetical protein [Legionella anisa]	hypothetical protein [Legionella cherrii]	hypothetical protein [Legionella moravica]	hypothetical protein [Legionella longbeachae]	hypothetical protein [Legionella sainthelensi]
WP_025384708.1	lpari_00903	WP_028385633.1	WP_035890316.1	WP_028388835.1	WP_028372339.1	WP_018577908.1	WP_031566575.1	YP_094168.1	WP_006870017.1	WP_019232542.1	WP_028381566.1	WP_028385464.1	WP_003634174.1	WP_027270536.1	glycine dehydrogenase [Legionella oakridgensis]	putative glycine dehydrogenase (decarboxylating) subunit 2	glycine dehydrogenase [Legionella geestiana]	glycine dehydrogenase [Legionella norrlandica]	glycine dehydrogenase [Legionella fairfieldensis]	glycine dehydrogenase [Legionella lansingensis]	glycine dehydrogenase subunit 2 [Legionella shakespearei]	glycine dehydrogenase [Legionella wadsworthii]	glycine dehydrogenase subunit 2 [Legionella pneumophila subsp. pneumophila str. Philadelphia 1]	glycine dehydrogenase subunit 2 [Legionella drancourtii]	glycine dehydrogenase subunit 2 [Legionella anisa]	glycine dehydrogenase [Legionella cherrii]	glycine dehydrogenase [Legionella moravica]	glycine dehydrogenase subunit 2 [Legionella longbeachae]	glycine dehydrogenase [Legionella sainthelensi]
WP_025384709.1	lpari_00902	WP_028385634.1	WP_035890320.1	WP_028388834.1	WP_028372338.1	WP_018577909.1	WP_031566573.1	YP_094169.1	WP_006870016.1	WP_019232541.1	WP_028381567.1	WP_028385463.1	WP_003634175.1	WP_027270537.1	GTP cyclohydrolase [Legionella oakridgensis]	hypothetical protein	GTP cyclohydrolase [Legionella geestiana]	GTP cyclohydrolase [Legionella norrlandica]	GTP cyclohydrolase [Legionella fairfieldensis]	GTP cyclohydrolase [Legionella lansingensis]	GTP cyclohydrolase II [Legionella shakespearei]	GTP cyclohydrolase [Legionella wadsworthii]	hypothetical protein lpg0115 [Legionella pneumophila subsp. pneumophila str. Philadelphia 1]	hypothetical protein [Legionella drancourtii]	GTP cyclohydrolase II [Legionella anisa]	GTP cyclohydrolase [Legionella cherrii]	GTP cyclohydrolase [Legionella moravica]	hypothetical protein [Legionella longbeachae]	GTP cyclohydrolase [Legionella sainthelensi]
WP_025384710.1	lpari_00901	WP_028385635.1	WP_035890322.1	WP_028388833.1	WP_028372337.1	WP_018577910.1	WP_031566570.1	YP_094170.1	WP_006870015.1	WP_019232540.1	WP_028381568.1	WP_028385462.1	WP_003634177.1	WP_027270538.1	glycine dehydrogenase [Legionella oakridgensis]	putative glycine dehydrogenase (decarboxylating) subunit 1	glycine dehydrogenase [Legionella geestiana]	glycine dehydrogenase [Legionella norrlandica]	glycine dehydrogenase [Legionella fairfieldensis]	glycine dehydrogenase [Legionella lansingensis]	glycine dehydrogenase subunit 1 [Legionella shakespearei]	glycine dehydrogenase [Legionella wadsworthii]	glycine dehydrogenase subunit 1 [Legionella pneumophila subsp. pneumophila str. Philadelphia 1]	glycine dehydrogenase subunit 1 [Legionella drancourtii]	glycine dehydrogenase subunit 1 [Legionella anisa]	glycine dehydrogenase [Legionella cherrii]	glycine dehydrogenase [Legionella moravica]	glycine dehydrogenase subunit 1 [Legionella longbeachae]	glycine dehydrogenase [Legionella sainthelensi]
WP_025384711.1	lpari_00900	WP_028385636.1	WP_035890325.1	WP_028388832.1	WP_028372336.1	WP_018577911.1	WP_031566569.1	YP_094171.1	WP_006870014.1	WP_019232539.1	WP_028381569.1	WP_028385461.1	WP_003634178.1	WP_027270539.1	glycine cleavage system protein H [Legionella oakridgensis]	Glycine cleavage system H protein	glycine cleavage system protein H [Legionella geestiana]	glycine cleavage system protein H [Legionella norrlandica]	glycine cleavage system protein H [Legionella fairfieldensis]	glycine cleavage system protein H [Legionella lansingensis]	glycine cleavage system protein H [Legionella shakespearei]	glycine cleavage system protein H [Legionella wadsworthii]	glycine cleavage system protein H [Legionella pneumophila subsp. pneumophila str. Philadelphia 1]	glycine cleavage system protein H [Legionella drancourtii]	glycine cleavage system protein H [Legionella anisa]	glycine cleavage system protein H [Legionella cherrii]	glycine cleavage system protein H [Legionella moravica]	glycine cleavage system protein H [Legionella longbeachae]	glycine cleavage system protein H [Legionella sainthelensi]
WP_025384712.1	lpari_00899	WP_028385637.1	WP_035890327.1	WP_028388831.1	WP_028372335.1	WP_018577912.1	WP_031566567.1	YP_094172.2	WP_006870013.1	WP_019232538.1	WP_028381570.1	WP_028385460.1	WP_003634180.1	WP_027270540.1	glycine cleavage system protein T [Legionella oakridgensis]	Aminomethyltransferase	glycine cleavage system protein T [Legionella geestiana]	glycine cleavage system protein T [Legionella norrlandica]	glycine cleavage system protein T [Legionella fairfieldensis]	glycine cleavage system protein T [Legionella lansingensis]	glycine cleavage system protein T [Legionella shakespearei]	glycine cleavage system protein T [Legionella wadsworthii]	glycine cleavage system aminomethyltransferase T [Legionella pneumophila subsp. pneumophila str. Philadelphia 1]	glycine cleavage system protein T [Legionella drancourtii]	glycine cleavage system protein T [Legionella anisa]	glycine cleavage system protein T [Legionella cherrii]	glycine cleavage system protein T [Legionella moravica]	glycine cleavage system protein T [Legionella longbeachae]	glycine cleavage system protein T [Legionella sainthelensi]
WP_025384715.1	lpari_00897	WP_028385638.1	WP_035890336.1	WP_028388828.1	WP_051546057.1	WP_018577914.1	WP_031566563.1	YP_094174.1	WP_040534489.1	WP_040522066.1	WP_028381572.1	WP_028385458.1	WP_003634184.1	WP_027270542.1	type IV secretion protein IcmL [Legionella oakridgensis]	hypothetical protein	hypothetical protein [Legionella geestiana]	type IV secretion protein IcmL [Legionella norrlandica]	type IV secretion protein IcmL [Legionella fairfieldensis]	type IV secretion protein IcmL [Legionella lansingensis]	hypothetical protein [Legionella shakespearei]	type IV secretion protein IcmL [Legionella wadsworthii]	IcmL-like protein [Legionella pneumophila subsp. pneumophila str. Philadelphia 1]	type IV secretion protein IcmL [Legionella drancourtii]	type IV secretion protein IcmL [Legionella anisa]	type IV secretion protein IcmL [Legionella cherrii]	type IV secretion protein IcmL [Legionella moravica]	type IV secretion system protein IcmL [Legionella longbeachae]	type IV secretion protein IcmL [Legionella sainthelensi]
WP_025384717.1	lpari_00895	WP_028385640.1	WP_035890337.1	WP_028388936.1	WP_028372327.1	WP_018577917.1	WP_031566560.1	YP_094176.1	WP_006870006.1	WP_019232534.1	WP_028381574.1	WP_028385454.1	WP_003634189.1	WP_027270544.1	nitrate ABC transporter ATP-binding protein [Legionella oakridgensis]	Bicarbonate transport ATP-binding protein CmpD	nitrate ABC transporter ATP-binding protein [Legionella geestiana]	nitrate ABC transporter ATP-binding protein [Legionella norrlandica]	nitrate ABC transporter ATP-binding protein [Legionella fairfieldensis]	nitrate ABC transporter ATP-binding protein [Legionella lansingensis]	ABC transporter [Legionella shakespearei]	nitrate ABC transporter ATP-binding protein [Legionella wadsworthii]	ABC transporter ATP-binding protein [Legionella pneumophila subsp. pneumophila str. Philadelphia 1]	nitrate ABC transporter ATP-binding protein [Legionella drancourtii]	nitrate ABC transporter ATP-binding protein [Legionella anisa]	nitrate ABC transporter ATP-binding protein [Legionella cherrii]	nitrate ABC transporter ATP-binding protein [Legionella moravica]	nitrate ABC transporter ATP-binding protein [Legionella longbeachae]	nitrate ABC transporter ATP-binding protein [Legionella sainthelensi]
WP_025384725.1	lpari_00891	WP_028385642.1	WP_035890338.1	WP_028389426.1	WP_028372324.1	WP_018577919.1	WP_031566554.1	YP_094178.1	WP_006870004.1	WP_019232530.1	WP_028381577.1	WP_028385452.1	WP_003634197.1	WP_027270548.1	cytochrome C [Legionella oakridgensis]	Cytochrome c4	cytochrome C [Legionella geestiana]	cytochrome C [Legionella norrlandica]	cytochrome C [Legionella fairfieldensis]	cytochrome C [Legionella lansingensis]	cytochrome C [Legionella shakespearei]	cytochrome C [Legionella wadsworthii]	cytochrome c4 [Legionella pneumophila subsp. pneumophila str. Philadelphia 1]	cytochrome C [Legionella drancourtii]	cytochrome C [Legionella anisa]	cytochrome C [Legionella cherrii]	cytochrome C [Legionella moravica]	cytochrome C [Legionella longbeachae]	cytochrome C [Legionella sainthelensi]
WP_025384726.1	lpari_00890	WP_028385644.1	WP_035890339.1	WP_028389427.1	WP_028372323.1	WP_018577920.1	WP_031566552.1	YP_094179.1	WP_006870003.1	WP_019232529.1	WP_028381578.1	WP_028385451.1	WP_003634198.1	WP_027270549.1	GTP-binding protein [Legionella oakridgensis]	putative GTP-binding protein EngB	GTP-binding protein [Legionella geestiana]	GTP-binding protein [Legionella norrlandica]	GTP-binding protein [Legionella fairfieldensis]	GTP-binding protein [Legionella lansingensis]	GTP-binding protein [Legionella shakespearei]	GTP-binding protein [Legionella wadsworthii]	ribosome biogenesis GTP-binding protein YsxC [Legionella pneumophila subsp. pneumophila str. Philadelphia 1]	GTP-binding protein [Legionella drancourtii]	GTP-binding protein [Legionella anisa]	GTP-binding protein [Legionella cherrii]	GTP-binding protein [Legionella moravica]	GTP-binding protein [Legionella longbeachae]	GTP-binding protein [Legionella sainthelensi]
WP_025384729.1	lpari_00877	WP_028385646.1	WP_035887166.1	WP_028389430.1	WP_028372320.1	WP_018577923.1	WP_031566531.1	YP_094183.1	WP_006870000.1	WP_019232516.1	WP_028381589.1	WP_028385448.1	WP_003634227.1	WP_027270560.1	methylmalonate-semialdehyde dehydrogenase [Legionella oakridgensis]	Putative 3-oxopropanoate dehydrogenase	methylmalonate-semialdehyde dehydrogenase [Legionella geestiana]	methylmalonate-semialdehyde dehydrogenase [Legionella norrlandica]	methylmalonate-semialdehyde dehydrogenase [Legionella fairfieldensis]	methylmalonate-semialdehyde dehydrogenase [Legionella lansingensis]	methylmalonate-semialdehyde dehydrogenase [Legionella shakespearei]	methylmalonate-semialdehyde dehydrogenase [Legionella wadsworthii]	methylmalonate-semialdehyde dehydrogenase [Legionella pneumophila subsp. pneumophila str. Philadelphia 1]	methylmalonate-semialdehyde dehydrogenase [Legionella drancourtii]	methylmalonate-semialdehyde dehydrogenase [Legionella anisa]	methylmalonate-semialdehyde dehydrogenase [Legionella cherrii]	methylmalonate-semialdehyde dehydrogenase [Legionella moravica]	methylmalonate-semialdehyde dehydrogenase [Legionella longbeachae]	methylmalonate-semialdehyde dehydrogenase [Legionella sainthelensi]
WP_025384731.1	lpari_01487	WP_028385649.1	WP_035887168.1	WP_028389432.1	WP_028372311.1	WP_018577926.1	WP_031566527.1	YP_094185.1	WP_006869997.1	WP_019232513.1	WP_028381591.1	WP_028385446.1	WP_003634231.1	WP_027270562.1	4-hydroxy-tetrahydrodipicolinate reductase [Legionella oakridgensis]	4-hydroxy-tetrahydrodipicolinate reductase	4-hydroxy-tetrahydrodipicolinate reductase [Legionella geestiana]	4-hydroxy-tetrahydrodipicolinate reductase [Legionella norrlandica]	4-hydroxy-tetrahydrodipicolinate reductase [Legionella fairfieldensis]	4-hydroxy-tetrahydrodipicolinate reductase [Legionella lansingensis]	4-hydroxy-tetrahydrodipicolinate reductase [Legionella shakespearei]	4-hydroxy-tetrahydrodipicolinate reductase [Legionella wadsworthii]	dihydrodipicolinate reductase [Legionella pneumophila subsp. pneumophila str. Philadelphia 1]	4-hydroxy-tetrahydrodipicolinate reductase [Legionella drancourtii]	4-hydroxy-tetrahydrodipicolinate reductase [Legionella anisa]	4-hydroxy-tetrahydrodipicolinate reductase [Legionella cherrii]	4-hydroxy-tetrahydrodipicolinate reductase [Legionella moravica]	4-hydroxy-tetrahydrodipicolinate reductase [Legionella longbeachae]	4-hydroxy-tetrahydrodipicolinate reductase [Legionella sainthelensi]
WP_025384736.1	lpari_01481	WP_028385654.1	WP_035887178.1	WP_028388734.1	WP_028372304.1	WP_018577933.1	WP_031566518.1	YP_094192.1	WP_006869992.1	WP_019232507.1	WP_028381596.1	WP_028385439.1	WP_003634244.1	WP_027270570.1	glyceraldehyde-3-phosphate dehydrogenase [Legionella oakridgensis]	Glyceraldehyde-3-phosphate dehydrogenase	glyceraldehyde-3-phosphate dehydrogenase [Legionella geestiana]	glyceraldehyde-3-phosphate dehydrogenase [Legionella norrlandica]	glyceraldehyde-3-phosphate dehydrogenase [Legionella fairfieldensis]	glyceraldehyde-3-phosphate dehydrogenase [Legionella lansingensis]	glyceraldehyde-3-phosphate dehydrogenase [Legionella shakespearei]	glyceraldehyde-3-phosphate dehydrogenase [Legionella wadsworthii]	glyceraldehyde 3-phosphate dehydrogenase [Legionella pneumophila subsp. pneumophila str. Philadelphia 1]	glyceraldehyde-3-phosphate dehydrogenase [Legionella drancourtii]	glyceraldehyde-3-phosphate dehydrogenase [Legionella anisa]	glyceraldehyde-3-phosphate dehydrogenase [Legionella cherrii]	glyceraldehyde-3-phosphate dehydrogenase [Legionella moravica]	glyceraldehyde-3-phosphate dehydrogenase [Legionella longbeachae]	glyceraldehyde-3-phosphate dehydrogenase [Legionella sainthelensi]
WP_025384739.1	lpari_01478	WP_028385657.1	WP_035887179.1	WP_028388732.1	WP_035914863.1	WP_018577937.1	WP_031566505.1	YP_094195.1	WP_006869988.1	WP_019232504.1	WP_028381599.1	WP_028385436.1	WP_003634251.1	WP_027270573.1	oligopeptidase A [Legionella oakridgensis]	Oligopeptidase A	oligopeptidase A [Legionella geestiana]	oligopeptidase A [Legionella norrlandica]	oligopeptidase A [Legionella fairfieldensis]	oligopeptidase A [Legionella lansingensis]	oligopeptidase A [Legionella shakespearei]	oligopeptidase A [Legionella wadsworthii]	oligopeptidase A [Legionella pneumophila subsp. pneumophila str. Philadelphia 1]	oligopeptidase A [Legionella drancourtii]	oligopeptidase A [Legionella anisa]	oligopeptidase A [Legionella cherrii]	oligopeptidase A [Legionella moravica]	oligopeptidase A [Legionella longbeachae]	oligopeptidase A [Legionella sainthelensi]
WP_025384797.1	lpari_02903	WP_028386900.1	WP_035890820.1	WP_028387904.1	WP_028373496.1	WP_018576139.1	WP_031564847.1	YP_096140.1	WP_006869266.1	WP_019235515.1	WP_028380030.1	WP_028385164.1	WP_003636472.1	WP_027271968.1	hypothetical protein [Legionella oakridgensis]	hypothetical protein	hypothetical protein [Legionella geestiana]	transpeptidase [Legionella norrlandica]	hypothetical protein [Legionella fairfieldensis]	hypothetical protein [Legionella lansingensis]	hypothetical protein [Legionella shakespearei]	hypothetical protein [Legionella wadsworthii]	hypothetical protein lpg2127 [Legionella pneumophila subsp. pneumophila str. Philadelphia 1]	hypothetical protein [Legionella drancourtii]	transpeptidase [Legionella anisa]	hypothetical protein [Legionella cherrii]	hypothetical protein [Legionella moravica]	hypothetical protein [Legionella longbeachae]	hypothetical protein [Legionella sainthelensi]
WP_025384850.1	lpari_03274	WP_028385660.1	WP_035888683.1	WP_028389402.1	WP_028372278.1	WP_018577043.1	WP_031567545.1	YP_095200.2	WP_006870291.1	WP_019235444.1	WP_028382028.1	WP_028385015.1	WP_003632298.1	WP_027271557.1	nucleotide-binding protein [Legionella oakridgensis]	hypothetical protein	nucleotide-binding protein [Legionella geestiana]	nucleotide-binding protein [Legionella norrlandica]	nucleotide-binding protein [Legionella fairfieldensis]	nucleotide-binding protein [Legionella lansingensis]	nucleotide-binding protein [Legionella shakespearei]	nucleotide-binding protein [Legionella wadsworthii]	nucleotide-binding protein [Legionella pneumophila subsp. pneumophila str. Philadelphia 1]	nucleotide-binding protein [Legionella drancourtii]	nucleotide-binding protein [Legionella anisa]	nucleotide-binding protein [Legionella cherrii]	nucleotide-binding protein [Legionella moravica]	nucleotide-binding protein [Legionella longbeachae]	nucleotide-binding protein [Legionella sainthelensi]
WP_025384856.1	lpari_02188	WP_028385663.1	WP_035889853.1	WP_028389405.1	WP_028372275.1	WP_018578015.1	WP_031563933.1	YP_094341.1	WP_006871124.1	WP_019235145.1	WP_028382668.1	WP_028385366.1	WP_003633119.1	WP_027272664.1	elongation factor P [Legionella oakridgensis]	Elongation factor P	elongation factor P [Legionella geestiana]	elongation factor P [Legionella norrlandica]	elongation factor P [Legionella fairfieldensis]	elongation factor P [Legionella lansingensis]	elongation factor P [Legionella shakespearei]	elongation factor P [Legionella wadsworthii]	elongation factor P [Legionella pneumophila subsp. pneumophila str. Philadelphia 1]	elongation factor P [Legionella drancourtii]	elongation factor P [Legionella anisa]	elongation factor P [Legionella cherrii]	elongation factor P [Legionella moravica]	elongation factor P [Legionella longbeachae]	elongation factor P [Legionella sainthelensi]
WP_025384857.1	lpari_02187	WP_028385664.1	WP_035889860.1	WP_028389406.1	WP_028372274.1	WP_018578016.1	WP_031563932.1	YP_094342.1	WP_006871123.1	WP_019235144.1	WP_028382669.1	WP_028385365.1	WP_003633118.1	WP_027272663.1	EF-P beta-lysylation protein EpmB [Legionella oakridgensis]	L-lysine 2,3-aminomutase	EF-P beta-lysylation protein EpmB [Legionella geestiana]	EF-P beta-lysylation protein EpmB [Legionella norrlandica]	EF-P beta-lysylation protein EpmB [Legionella fairfieldensis]	EF-P beta-lysylation protein EpmB [Legionella lansingensis]	EF-P beta-lysylation protein EpmB [Legionella shakespearei]	EF-P beta-lysylation protein EpmB [Legionella wadsworthii]	L-lysine 2,3-aminomutase [Legionella pneumophila subsp. pneumophila str. Philadelphia 1]	EF-P beta-lysylation protein EpmB [Legionella drancourtii]	EF-P beta-lysylation protein EpmB [Legionella anisa]	EF-P beta-lysylation protein EpmB [Legionella cherrii]	EF-P beta-lysylation protein EpmB [Legionella moravica]	EF-P beta-lysylation protein EpmB [Legionella longbeachae]	EF-P beta-lysylation protein EpmB [Legionella sainthelensi]
WP_025384860.1	lpari_02179	WP_028387240.1	WP_035889885.1	WP_028388873.1	WP_028372268.1	WP_018578022.1	WP_031563925.1	YP_094349.1	WP_006871114.1	WP_019235137.1	WP_028382677.1	WP_028385359.1	WP_003633104.1	WP_027272656.1	mannose-1-phosphate guanylyltransferase [Legionella oakridgensis]	Glucose-1-phosphate thymidylyltransferase	mannose-1-phosphate guanylyltransferase [Legionella geestiana]	mannose-1-phosphate guanylyltransferase [Legionella norrlandica]	mannose-1-phosphate guanylyltransferase [Legionella fairfieldensis]	mannose-1-phosphate guanylyltransferase [Legionella lansingensis]	hypothetical protein [Legionella shakespearei]	mannose-1-phosphate guanylyltransferase [Legionella wadsworthii]	mannose-1-phosphate guanylyltransferase [Legionella pneumophila subsp. pneumophila str. Philadelphia 1]	mannose-1-phosphate guanylyltransferase [Legionella drancourtii]	mannose-1-phosphate guanylyltransferase [Legionella anisa]	mannose-1-phosphate guanylyltransferase [Legionella cherrii]	mannose-1-phosphate guanylyltransferase [Legionella moravica]	mannose-1-phosphate guanylyltransferase [Legionella longbeachae]	mannose-1-phosphate guanylyltransferase [Legionella sainthelensi]
WP_025384861.1	lpari_02178	WP_028387239.1	WP_035889887.1	WP_028388874.1	WP_028372267.1	WP_018578023.1	WP_031563924.1	YP_094350.1	WP_040535252.1	WP_019235136.1	WP_028382678.1	WP_028385358.1	WP_003633103.1	WP_027272655.1	phosphotransferase [Legionella oakridgensis]	hypothetical protein	hypothetical protein [Legionella geestiana]	phosphotransferase [Legionella norrlandica]	phosphotransferase [Legionella fairfieldensis]	phosphotransferase [Legionella lansingensis]	hypothetical protein [Legionella shakespearei]	phosphotransferase [Legionella wadsworthii]	phosphotransferase [Legionella pneumophila subsp. pneumophila str. Philadelphia 1]	phosphotransferase [Legionella drancourtii]	phosphotransferase [Legionella anisa]	phosphotransferase [Legionella cherrii]	phosphotransferase [Legionella moravica]	phosphotransferase [Legionella longbeachae]	phosphotransferase [Legionella sainthelensi]
WP_025384863.1	lpari_02176	WP_028387238.1	WP_035889889.1	WP_028388876.1	WP_028372265.1	WP_018578025.1	WP_031563922.1	YP_094352.1	WP_006871111.1	WP_019235134.1	WP_028382680.1	WP_028385356.1	WP_003633098.1	WP_027272653.1	molecular chaperone SurA [Legionella oakridgensis]	Chaperone SurA	molecular chaperone SurA [Legionella geestiana]	molecular chaperone SurA [Legionella norrlandica]	molecular chaperone SurA [Legionella fairfieldensis]	molecular chaperone SurA [Legionella lansingensis]	molecular chaperone SurA [Legionella shakespearei]	molecular chaperone SurA [Legionella wadsworthii]	peptidyl-prolyl cis-trans isomerase D [Legionella pneumophila subsp. pneumophila str. Philadelphia 1]	molecular chaperone SurA [Legionella drancourtii]	molecular chaperone SurA [Legionella anisa]	molecular chaperone SurA [Legionella cherrii]	molecular chaperone SurA [Legionella moravica]	molecular chaperone SurA [Legionella longbeachae]	molecular chaperone SurA [Legionella sainthelensi]
WP_025384866.1	lpari_01282	WP_051550840.1	WP_035890988.1	WP_028389262.1	WP_028374156.1	WP_018578060.1	WP_031562580.1	YP_094361.1	WP_006872222.1	WP_019233352.1	WP_028381771.1	WP_028384371.1	WP_049775006.1	WP_051544795.1	transcription termination/antitermination factor NusG [Legionella oakridgensis]	hypothetical protein	antitermination protein NusG [Legionella geestiana]	transcription termination/antitermination factor NusG [Legionella norrlandica]	transcription termination/antitermination factor NusG [Legionella fairfieldensis]	transcription termination/antitermination factor NusG [Legionella lansingensis]	transcription termination/antitermination factor NusG [Legionella shakespearei]	transcription termination/antitermination factor NusG [Legionella wadsworthii]	transcription antitermination protein NusG [Legionella pneumophila subsp. pneumophila str. Philadelphia 1]	transcription termination/antitermination factor NusG [Legionella drancourtii]	transcription termination/antitermination factor NusG [Legionella anisa]	transcription termination/antitermination factor NusG [Legionella cherrii]	transcription termination/antitermination factor NusG [Legionella moravica]	antitermination protein NusG [Legionella longbeachae]	antitermination protein NusG [Legionella sainthelensi]
WP_025384869.1	lpari_01285	WP_028386059.1	WP_035890993.1	WP_028389265.1	WP_028374159.1	WP_018578057.1	WP_031562578.1	YP_094364.1	WP_006872225.1	WP_019233354.1	WP_028381773.1	WP_028384374.1	WP_004450485.1	WP_027272358.1	50S ribosomal protein L10 [Legionella oakridgensis]	50S ribosomal protein L10	50S ribosomal protein L10 [Legionella geestiana]	50S ribosomal protein L10 [Legionella norrlandica]	50S ribosomal protein L10 [Legionella fairfieldensis]	50S ribosomal protein L10 [Legionella lansingensis]	50S ribosomal protein L10 [Legionella shakespearei]	50S ribosomal protein L10 [Legionella wadsworthii]	50S ribosomal protein L10 [Legionella pneumophila subsp. pneumophila str. Philadelphia 1]	50S ribosomal protein L10 [Legionella drancourtii]	50S ribosomal protein L10 [Legionella anisa]	50S ribosomal protein L10 [Legionella cherrii]	50S ribosomal protein L10 [Legionella moravica]	50S ribosomal protein L10 [Legionella longbeachae]	50S ribosomal protein L10 [Legionella sainthelensi]
WP_025384872.1	lpari_01290	WP_028386054.1	WP_035891005.1	WP_028389270.1	WP_028374164.1	WP_018578053.1	WP_031562574.1	YP_094369.1	WP_006872230.1	WP_019233358.1	WP_028381777.1	WP_028384378.1	WP_004450467.1	WP_027272355.1	30S ribosomal protein S7 [Legionella oakridgensis]	30S ribosomal protein S7	30S ribosomal protein S7 [Legionella geestiana]	30S ribosomal protein S7 [Legionella norrlandica]	30S ribosomal protein S7 [Legionella fairfieldensis]	30S ribosomal protein S7 [Legionella lansingensis]	30S ribosomal protein S7 [Legionella shakespearei]	30S ribosomal protein S7 [Legionella wadsworthii]	30S ribosomal protein S7 [Legionella pneumophila subsp. pneumophila str. Philadelphia 1]	30S ribosomal protein S7 [Legionella drancourtii]	30S ribosomal protein S7 [Legionella anisa]	30S ribosomal protein S7 [Legionella cherrii]	30S ribosomal protein S7 [Legionella moravica]	30S ribosomal protein S7 [Legionella longbeachae]	30S ribosomal protein S7 [Legionella sainthelensi]
WP_025384873.1	lpari_01291	WP_028386053.1	WP_035891007.1	WP_028389271.1	WP_028374165.1	WP_018578052.1	WP_031562573.1	YP_094370.1	WP_006872231.1	WP_019233359.1	WP_028381778.1	WP_028384379.1	WP_004450465.1	WP_027272354.1	elongation factor G [Legionella oakridgensis]	Elongation factor G	elongation factor G [Legionella geestiana]	elongation factor G [Legionella norrlandica]	elongation factor G, partial [Legionella fairfieldensis]	elongation factor G [Legionella lansingensis]	elongation factor G [Legionella shakespearei]	elongation factor G [Legionella wadsworthii]	elongation factor G [Legionella pneumophila subsp. pneumophila str. Philadelphia 1]	elongation factor G [Legionella drancourtii]	elongation factor G [Legionella anisa]	elongation factor G [Legionella cherrii]	elongation factor G [Legionella moravica]	elongation factor G [Legionella longbeachae]	elongation factor G [Legionella sainthelensi]
WP_025384875.1	lpari_02373	WP_028386050.1	WP_052117649.1	WP_028388507.1	WP_028373278.1	WP_018577111.1	WP_035898948.1	YP_094373.2	WP_040536282.1	WP_040522527.1	WP_035900883.1	WP_051190762.1	WP_035904800.1	WP_027272066.1	50S ribosomal protein L3 [Legionella oakridgensis]	50S ribosomal protein L3	50S ribosomal protein L3 [Legionella geestiana]	50S ribosomal protein L3 [Legionella norrlandica]	50S ribosomal protein L3 [Legionella fairfieldensis]	50S ribosomal protein L3 [Legionella lansingensis]	50S ribosomal protein L3 [Legionella shakespearei]	50S ribosomal protein L3 [Legionella wadsworthii]	50S ribosomal protein L3 [Legionella pneumophila subsp. pneumophila str. Philadelphia 1]	50S ribosomal protein L3 [Legionella drancourtii]	50S ribosomal protein L3 [Legionella anisa]	50S ribosomal protein L3 [Legionella cherrii]	50S ribosomal protein L3 [Legionella moravica]	50S ribosomal protein L3 [Legionella longbeachae]	50S ribosomal protein L3 [Legionella sainthelensi]
WP_025384876.1	lpari_02371	WP_028386049.1	WP_035890559.1	WP_028388508.1	WP_028373279.1	WP_018577112.1	WP_031563286.1	YP_094374.1	WP_006872235.1	WP_019233363.1	WP_028381392.1	WP_028385543.1	WP_003633091.1	WP_027272067.1	50S ribosomal protein L4 [Legionella oakridgensis]	50S ribosomal protein L4	50S ribosomal protein L4 [Legionella geestiana]	50S ribosomal protein L4 [Legionella norrlandica]	50S ribosomal protein L4 [Legionella fairfieldensis]	50S ribosomal protein L4 [Legionella lansingensis]	50S ribosomal protein L4 [Legionella shakespearei]	50S ribosomal protein L4 [Legionella wadsworthii]	50S ribosomal protein L4 [Legionella pneumophila subsp. pneumophila str. Philadelphia 1]	50S ribosomal protein L4 [Legionella drancourtii]	50S ribosomal protein L4 [Legionella anisa]	50S ribosomal protein L4 [Legionella cherrii]	50S ribosomal protein L4 [Legionella moravica]	50S ribosomal protein L4 [Legionella longbeachae]	50S ribosomal protein L4 [Legionella sainthelensi]
WP_025384877.1	lpari_02369	WP_028386047.1	WP_035890556.1	WP_028388510.1	WP_028373281.1	WP_018577114.1	WP_031563291.1	YP_094376.1	WP_006872237.1	WP_019233365.1	WP_028381390.1	WP_028385541.1	WP_003633089.1	WP_027272069.1	50S ribosomal protein L2 [Legionella oakridgensis]	50S ribosomal protein L2	50S ribosomal protein L2 [Legionella geestiana]	50S ribosomal protein L2 [Legionella norrlandica]	50S ribosomal protein L2 [Legionella fairfieldensis]	50S ribosomal protein L2 [Legionella lansingensis]	50S ribosomal protein L2 [Legionella shakespearei]	50S ribosomal protein L2 [Legionella wadsworthii]	50S ribosomal protein L2 [Legionella pneumophila subsp. pneumophila str. Philadelphia 1]	50S ribosomal protein L2 [Legionella drancourtii]	50S ribosomal protein L2 [Legionella anisa]	50S ribosomal protein L2 [Legionella cherrii]	50S ribosomal protein L2 [Legionella moravica]	50S ribosomal protein L2 [Legionella longbeachae]	50S ribosomal protein L2 [Legionella sainthelensi]
WP_025384882.1	lpari_02364	WP_028386042.1	WP_035890552.1	WP_028388515.1	WP_028373286.1	WP_018577119.1	WP_031563297.1	YP_094381.1	WP_006872241.1	WP_019233368.1	WP_028381388.1	WP_028385537.1	WP_003633082.1	WP_027272071.1	50S ribosomal protein L29 [Legionella oakridgensis]	50S ribosomal protein L29	50S ribosomal protein L29 [Legionella geestiana]	50S ribosomal protein L29 [Legionella norrlandica]	50S ribosomal protein L29 [Legionella fairfieldensis]	50S ribosomal protein L29 [Legionella lansingensis]	50S ribosomal protein L29 [Legionella shakespearei]	50S ribosomal protein L29 [Legionella wadsworthii]	50S ribosomal protein L29 [Legionella pneumophila subsp. pneumophila str. Philadelphia 1]	50S ribosomal protein L29 [Legionella drancourtii]	50S ribosomal protein L29 [Legionella anisa]	50S ribosomal protein L29 [Legionella cherrii]	50S ribosomal protein L29 [Legionella moravica]	50S ribosomal protein L29 [Legionella longbeachae]	50S ribosomal protein L29 [Legionella sainthelensi]
WP_025384885.1	lpari_02361	WP_028386039.1	WP_035890547.1	WP_028388518.1	WP_028373289.1	WP_018577121.1	WP_031563301.1	YP_094384.1	WP_040536157.1	WP_019233370.1	WP_028381386.1	WP_028385534.1	WP_003633075.1	WP_027272073.1	50S ribosomal protein L24 [Legionella oakridgensis]	50S ribosomal protein L24	50S ribosomal protein L24 [Legionella geestiana]	50S ribosomal protein L24 [Legionella norrlandica]	50S ribosomal protein L24 [Legionella fairfieldensis]	50S ribosomal protein L24 [Legionella lansingensis]	50S ribosomal protein L24 [Legionella shakespearei]	50S ribosomal protein L24 [Legionella wadsworthii]	50S ribosomal protein L24 [Legionella pneumophila subsp. pneumophila str. Philadelphia 1]	50S ribosomal protein L24 [Legionella drancourtii]	50S ribosomal protein L24 [Legionella anisa]	50S ribosomal protein L24 [Legionella cherrii]	50S ribosomal protein L24 [Legionella moravica]	50S ribosomal protein L24 [Legionella longbeachae]	50S ribosomal protein L24 [Legionella sainthelensi]
WP_025384886.1	lpari_02360	WP_028386038.1	WP_035890546.1	WP_028388519.1	WP_028373290.1	WP_018577122.1	WP_031563303.1	YP_094385.2	WP_006872244.1	WP_019233371.1	WP_028381385.1	WP_028385533.1	WP_003633073.1	WP_027272074.1	50S ribosomal protein L5 [Legionella oakridgensis]	50S ribosomal protein L5	50S ribosomal protein L5 [Legionella geestiana]	50S ribosomal protein L5 [Legionella norrlandica]	50S ribosomal protein L5 [Legionella fairfieldensis]	50S ribosomal protein L5 [Legionella lansingensis]	50S ribosomal protein L5 [Legionella shakespearei]	50S ribosomal protein L5 [Legionella wadsworthii]	50S ribosomal protein L5 [Legionella pneumophila subsp. pneumophila str. Philadelphia 1]	50S ribosomal protein L5 [Legionella drancourtii]	50S ribosomal protein L5 [Legionella anisa]	50S ribosomal protein L5 [Legionella cherrii]	50S ribosomal protein L5 [Legionella moravica]	50S ribosomal protein L5 [Legionella longbeachae]	50S ribosomal protein L5 [Legionella sainthelensi]
WP_025384888.1	lpari_02358	WP_028386036.1	WP_035890562.1	WP_028388521.1	WP_028373292.1	WP_018577123.1	WP_031563308.1	YP_094387.2	WP_006872246.1	WP_019233373.1	WP_028381383.1	WP_028385531.1	WP_012978805.1	WP_027272076.1	30S ribosomal protein S8 [Legionella oakridgensis]	30S ribosomal protein S8	30S ribosomal protein S8 [Legionella geestiana]	30S ribosomal protein S8 [Legionella norrlandica]	30S ribosomal protein S8 [Legionella fairfieldensis]	30S ribosomal protein S8 [Legionella lansingensis]	30S ribosomal protein S8 [Legionella shakespearei]	30S ribosomal protein S8 [Legionella wadsworthii]	30S ribosomal protein S8 [Legionella pneumophila subsp. pneumophila str. Philadelphia 1]	30S ribosomal protein S8 [Legionella drancourtii]	30S ribosomal protein S8 [Legionella anisa]	30S ribosomal protein S8 [Legionella cherrii]	30S ribosomal protein S8 [Legionella moravica]	30S ribosomal protein S8 [Legionella longbeachae]	30S ribosomal protein S8 [Legionella sainthelensi]
WP_025384889.1	lpari_02357	WP_028386035.1	WP_035890542.1	WP_028388522.1	WP_028373293.1	WP_018577124.1	WP_031563310.1	YP_094388.1	WP_006872247.1	WP_019233374.1	WP_028381382.1	WP_028385530.1	WP_003633066.1	WP_027272077.1	50S ribosomal protein L6 [Legionella oakridgensis]	50S ribosomal protein L6	50S ribosomal protein L6 [Legionella geestiana]	50S ribosomal protein L6 [Legionella norrlandica]	50S ribosomal protein L6 [Legionella fairfieldensis]	50S ribosomal protein L6 [Legionella lansingensis]	50S ribosomal protein L6 [Legionella shakespearei]	50S ribosomal protein L6 [Legionella wadsworthii]	50S ribosomal protein L6 [Legionella pneumophila subsp. pneumophila str. Philadelphia 1]	50S ribosomal protein L6 [Legionella drancourtii]	50S ribosomal protein L6 [Legionella anisa]	50S ribosomal protein L6 [Legionella cherrii]	50S ribosomal protein L6 [Legionella moravica]	50S ribosomal protein L6 [Legionella longbeachae]	50S ribosomal protein L6 [Legionella sainthelensi]
WP_025384890.1	lpari_02356	WP_028386034.1	WP_035890541.1	WP_028388523.1	WP_028373294.1	WP_018577125.1	WP_031563312.1	YP_094389.2	WP_006872248.1	WP_019233375.1	WP_028381381.1	WP_028385529.1	WP_003633064.1	WP_027272078.1	50S ribosomal protein L18 [Legionella oakridgensis]	50S ribosomal protein L18	50S ribosomal protein L18 [Legionella geestiana]	50S ribosomal protein L18 [Legionella norrlandica]	50S ribosomal protein L18 [Legionella fairfieldensis]	50S ribosomal protein L18 [Legionella lansingensis]	50S ribosomal protein L18 [Legionella shakespearei]	50S ribosomal protein L18 [Legionella wadsworthii]	50S ribosomal protein L18 [Legionella pneumophila subsp. pneumophila str. Philadelphia 1]	50S ribosomal protein L18 [Legionella drancourtii]	50S ribosomal protein L18 [Legionella anisa]	50S ribosomal protein L18 [Legionella cherrii]	50S ribosomal protein L18 [Legionella moravica]	50S ribosomal protein L18 [Legionella longbeachae]	50S ribosomal protein L18 [Legionella sainthelensi]
WP_025384891.1	lpari_02355	WP_028386033.1	WP_010946095.1	WP_028388524.1	WP_028373295.1	WP_018577126.1	WP_031563314.1	YP_094390.1	WP_006872249.1	WP_019233376.1	WP_028381380.1	WP_028385528.1	WP_003633062.1	WP_027272079.1	30S ribosomal protein S5 [Legionella oakridgensis]	30S ribosomal protein S5	30S ribosomal protein S5 [Legionella geestiana]	MULTISPECIES: 30S ribosomal protein S5 [Legionella]	30S ribosomal protein S5 [Legionella fairfieldensis]	30S ribosomal protein S5 [Legionella lansingensis]	30S ribosomal protein S5 [Legionella shakespearei]	30S ribosomal protein S5 [Legionella wadsworthii]	30S ribosomal protein S5 [Legionella pneumophila subsp. pneumophila str. Philadelphia 1]	30S ribosomal protein S5 [Legionella drancourtii]	30S ribosomal protein S5 [Legionella anisa]	30S ribosomal protein S5 [Legionella cherrii]	30S ribosomal protein S5 [Legionella moravica]	30S ribosomal protein S5 [Legionella longbeachae]	30S ribosomal protein S5 [Legionella sainthelensi]
WP_025384892.1	lpari_02354	WP_028386032.1	WP_035890539.1	WP_028388525.1	WP_028373296.1	WP_018577127.1	WP_031563316.1	YP_094391.1	WP_006872250.1	WP_019233377.1	WP_028381379.1	WP_028385527.1	WP_003633060.1	WP_027272080.1	50S ribosomal protein L30 [Legionella oakridgensis]	50S ribosomal protein L30	50S ribosomal protein L30 [Legionella geestiana]	50S ribosomal protein L30 [Legionella norrlandica]	50S ribosomal protein L30 [Legionella fairfieldensis]	50S ribosomal protein L30 [Legionella lansingensis]	50S ribosomal protein L30 [Legionella shakespearei]	50S ribosomal protein L30 [Legionella wadsworthii]	50S ribosomal protein L30 [Legionella pneumophila subsp. pneumophila str. Philadelphia 1]	50S ribosomal protein L30 [Legionella drancourtii]	50S ribosomal protein L30 [Legionella anisa]	50S ribosomal protein L30 [Legionella cherrii]	50S ribosomal protein L30 [Legionella moravica]	50S ribosomal protein L30 [Legionella longbeachae]	50S ribosomal protein L30 [Legionella sainthelensi]
WP_025384893.1	lpari_02353	WP_028386031.1	WP_035890537.1	WP_028388526.1	WP_028373297.1	WP_018577128.1	WP_031563317.1	YP_094392.1	WP_006872251.1	WP_019233378.1	WP_028381378.1	WP_028385526.1	WP_003633058.1	WP_027272081.1	50S ribosomal protein L15 [Legionella oakridgensis]	50S ribosomal protein L15	50S ribosomal protein L15 [Legionella geestiana]	50S ribosomal protein L15 [Legionella norrlandica]	50S ribosomal protein L15 [Legionella fairfieldensis]	50S ribosomal protein L15 [Legionella lansingensis]	50S ribosomal protein L15 [Legionella shakespearei]	50S ribosomal protein L15 [Legionella wadsworthii]	50S ribosomal protein L15 [Legionella pneumophila subsp. pneumophila str. Philadelphia 1]	50S ribosomal protein L15 [Legionella drancourtii]	50S ribosomal protein L15 [Legionella anisa]	50S ribosomal protein L15 [Legionella cherrii]	50S ribosomal protein L15 [Legionella moravica]	50S ribosomal protein L15 [Legionella longbeachae]	50S ribosomal protein L15 [Legionella sainthelensi]
WP_025384894.1	lpari_02352	WP_028386030.1	WP_035890536.1	WP_028388527.1	WP_028373298.1	WP_018577129.1	WP_031563319.1	YP_094393.1	WP_006872252.1	WP_019233379.1	WP_028381377.1	WP_028385525.1	WP_035904568.1	WP_027272082.1	preprotein translocase subunit SecY [Legionella oakridgensis]	Protein translocase subunit SecY	preprotein translocase subunit SecY [Legionella geestiana]	preprotein translocase subunit SecY [Legionella norrlandica]	preprotein translocase subunit SecY [Legionella fairfieldensis]	preprotein translocase subunit SecY [Legionella lansingensis]	preprotein translocase subunit SecY [Legionella shakespearei]	preprotein translocase subunit SecY [Legionella wadsworthii]	preprotein translocase subunit SecY [Legionella pneumophila subsp. pneumophila str. Philadelphia 1]	preprotein translocase subunit SecY [Legionella drancourtii]	preprotein translocase subunit SecY [Legionella anisa]	preprotein translocase subunit SecY [Legionella cherrii]	preprotein translocase subunit SecY [Legionella moravica]	preprotein translocase subunit SecY [Legionella longbeachae]	preprotein translocase subunit SecY [Legionella sainthelensi]
WP_025384898.1	lpari_02348	WP_028386026.1	WP_035890532.1	WP_028388531.1	WP_035915540.1	WP_018577133.1	WP_031563325.1	YP_094398.1	WP_006872255.1	WP_019233382.1	WP_028381374.1	WP_028385521.1	WP_003633048.1	WP_027272083.1	DNA-directed RNA polymerase subunit alpha [Legionella oakridgensis]	DNA-directed RNA polymerase subunit alpha	DNA-directed RNA polymerase subunit alpha [Legionella geestiana]	DNA-directed RNA polymerase subunit alpha [Legionella norrlandica]	DNA-directed RNA polymerase subunit alpha [Legionella fairfieldensis]	DNA-directed RNA polymerase subunit alpha [Legionella lansingensis]	DNA-directed RNA polymerase subunit alpha [Legionella shakespearei]	DNA-directed RNA polymerase subunit alpha [Legionella wadsworthii]	DNA-directed RNA polymerase subunit alpha [Legionella pneumophila subsp. pneumophila str. Philadelphia 1]	DNA-directed RNA polymerase subunit alpha [Legionella drancourtii]	DNA-directed RNA polymerase subunit alpha [Legionella anisa]	DNA-directed RNA polymerase subunit alpha [Legionella cherrii]	DNA-directed RNA polymerase subunit alpha [Legionella moravica]	DNA-directed RNA polymerase subunit alpha [Legionella longbeachae]	DNA-directed RNA polymerase subunit alpha [Legionella sainthelensi]
WP_025384899.1	lpari_02347	WP_028386025.1	WP_035890531.1	WP_028388532.1	WP_028373303.1	WP_018577134.1	WP_031563328.1	YP_094399.1	WP_006872256.1	WP_019233383.1	WP_028381373.1	WP_028385520.1	WP_003633046.1	WP_027272084.1	50S ribosomal protein L17 [Legionella oakridgensis]	50S ribosomal protein L17	50S ribosomal protein L17 [Legionella geestiana]	50S ribosomal protein L17 [Legionella norrlandica]	50S ribosomal protein L17 [Legionella fairfieldensis]	50S ribosomal protein L17 [Legionella lansingensis]	50S ribosomal protein L17 [Legionella shakespearei]	50S ribosomal protein L17 [Legionella wadsworthii]	50S ribosomal protein L17 [Legionella pneumophila subsp. pneumophila str. Philadelphia 1]	50S ribosomal protein L17 [Legionella drancourtii]	50S ribosomal protein L17 [Legionella anisa]	50S ribosomal protein L17 [Legionella cherrii]	50S ribosomal protein L17 [Legionella moravica]	50S ribosomal protein L17 [Legionella longbeachae]	50S ribosomal protein L17 [Legionella sainthelensi]
WP_025384900.1	lpari_02344	WP_028385972.1	WP_035890529.1	WP_028388534.1	WP_028373304.1	WP_018577135.1	WP_031563332.1	YP_094400.1	WP_006872258.1	WP_019233386.1	WP_028381371.1	WP_028385518.1	WP_003633038.1	WP_027272085.1	single-stranded DNA-binding protein [Legionella oakridgensis]	Single-stranded DNA-binding protein	single-stranded DNA-binding protein [Legionella geestiana]	single-stranded DNA-binding protein [Legionella norrlandica]	single-stranded DNA-binding protein [Legionella fairfieldensis]	single-stranded DNA-binding protein [Legionella lansingensis]	single-stranded DNA-binding protein [Legionella shakespearei]	single-stranded DNA-binding protein [Legionella wadsworthii]	single strand binding protein [Legionella pneumophila subsp. pneumophila str. Philadelphia 1]	single-stranded DNA-binding protein [Legionella drancourtii]	single-stranded DNA-binding protein [Legionella anisa]	single-stranded DNA-binding protein [Legionella cherrii]	single-stranded DNA-binding protein [Legionella moravica]	single-stranded DNA-binding protein [Legionella longbeachae]	single-stranded DNA-binding protein [Legionella sainthelensi]
WP_025384901.1	lpari_02340	WP_051550829.1	WP_035890527.1	WP_028388535.1	WP_028373305.1	WP_026253924.1	WP_031563336.1	YP_094401.1	WP_006872262.1	WP_019233391.1	WP_028381368.1	WP_028385517.1	WP_012978808.1	WP_027272089.1	MFS transporter [Legionella oakridgensis]	Inner membrane transport protein YajR	hypothetical protein [Legionella geestiana]	MFS transporter [Legionella norrlandica]	MFS transporter [Legionella fairfieldensis]	MFS transporter [Legionella lansingensis]	MFS transporter [Legionella shakespearei]	MFS transporter [Legionella wadsworthii]	major facilitator family transporter [Legionella pneumophila subsp. pneumophila str. Philadelphia 1]	MFS transporter [Legionella drancourtii]	MFS transporter [Legionella anisa]	MFS transporter [Legionella cherrii]	MFS transporter [Legionella moravica]	MFS transporter [Legionella longbeachae]	MFS transporter [Legionella sainthelensi]
WP_025384902.1	lpari_02339	WP_028385971.1	WP_035890525.1	WP_028388536.1	WP_028373306.1	WP_018577137.1	WP_031563338.1	YP_094402.1	WP_006872263.1	WP_019233392.1	WP_028381367.1	WP_028385516.1	WP_003633033.1	WP_027272090.1	enoyl-ACP reductase [Legionella oakridgensis]	Enoyl-[acyl-carrier-protein] reductase [NADPH] FabL	enoyl-ACP reductase [Legionella geestiana]	enoyl-ACP reductase [Legionella norrlandica]	enoyl-ACP reductase [Legionella fairfieldensis]	enoyl-ACP reductase [Legionella lansingensis]	enoyl-ACP reductase [Legionella shakespearei]	enoyl-ACP reductase [Legionella wadsworthii]	enoyl-ACP reductase [Legionella pneumophila subsp. pneumophila str. Philadelphia 1]	enoyl-ACP reductase [Legionella drancourtii]	enoyl-ACP reductase [Legionella anisa]	enoyl-ACP reductase [Legionella cherrii]	enoyl-ACP reductase [Legionella moravica]	enoyl-ACP reductase [Legionella longbeachae]	enoyl-ACP reductase [Legionella sainthelensi]
WP_025384904.1	lpari_02338	WP_028386835.1	WP_035890524.1	WP_028388541.1	WP_028373308.1	WP_018577138.1	WP_031563340.1	YP_094403.1	WP_006872264.1	WP_019233393.1	WP_028381366.1	WP_028385515.1	WP_003633031.1	WP_027272091.1	acyl carrier protein [Legionella oakridgensis]	Acyl carrier protein AcpXL	acyl carrier protein [Legionella geestiana]	acyl carrier protein [Legionella norrlandica]	acyl carrier protein [Legionella fairfieldensis]	acyl carrier protein [Legionella lansingensis]	acyl carrier protein [Legionella shakespearei]	acyl carrier protein [Legionella wadsworthii]	acyl carrier protein [Legionella pneumophila subsp. pneumophila str. Philadelphia 1]	acyl carrier protein [Legionella drancourtii]	acyl carrier protein [Legionella anisa]	acyl carrier protein [Legionella cherrii]	acyl carrier protein [Legionella moravica]	acyl carrier protein [Legionella longbeachae]	acyl carrier protein [Legionella sainthelensi]
WP_025384906.1	lpari_02335	WP_028386832.1	WP_035890522.1	WP_028388544.1	WP_028373311.1	WP_018577141.1	WP_031563346.1	YP_094406.1	WP_006872267.1	WP_019233396.1	WP_028381363.1	WP_028385512.1	WP_003633028.1	WP_027272094.1	3-oxoacyl-ACP synthase [Legionella oakridgensis]	3-oxoacyl-[acyl-carrier-protein] synthase 2	3-oxoacyl-ACP synthase [Legionella geestiana]	3-oxoacyl-ACP synthase [Legionella norrlandica]	3-oxoacyl-ACP synthase [Legionella fairfieldensis]	3-oxoacyl-ACP synthase [Legionella lansingensis]	3-oxoacyl-ACP synthase [Legionella shakespearei]	3-oxoacyl-ACP synthase [Legionella wadsworthii]	3-oxoacyl-ACP synthase [Legionella pneumophila subsp. pneumophila str. Philadelphia 1]	3-oxoacyl-ACP synthase [Legionella drancourtii]	3-oxoacyl-ACP synthase [Legionella anisa]	3-oxoacyl-ACP synthase [Legionella cherrii]	3-oxoacyl-ACP synthase [Legionella moravica]	3-oxoacyl-ACP synthase [Legionella longbeachae]	3-oxoacyl-ACP synthase [Legionella sainthelensi]
WP_025384911.1	lpari_02329	WP_028385937.1	WP_035890943.1	WP_028388552.1	WP_028373328.1	WP_018577152.1	WP_031563359.1	YP_094414.1	WP_006872277.1	WP_019233402.1	WP_028381357.1	WP_028385506.1	WP_003633018.1	WP_027272099.1	ribosome association toxin RatA [Legionella oakridgensis]	Ribosome association toxin RatA	ribosome association toxin RatA [Legionella geestiana]	ribosome association toxin RatA [Legionella norrlandica]	ribosome association toxin RatA [Legionella fairfieldensis]	ribosome association toxin RatA [Legionella lansingensis]	hypothetical protein [Legionella shakespearei]	ribosome association toxin RatA [Legionella wadsworthii]	oligoketide cyclase/lipid transporter protein [Legionella pneumophila subsp. pneumophila str. Philadelphia 1]	hypothetical protein [Legionella drancourtii]	hypothetical protein [Legionella anisa]	ribosome association toxin RatA [Legionella cherrii]	ribosome association toxin RatA [Legionella moravica]	hypothetical protein [Legionella longbeachae]	ribosome association toxin RatA [Legionella sainthelensi]
WP_025384912.1	lpari_02328	WP_035901873.1	WP_035890944.1	WP_028388553.1	WP_028373329.1	WP_018577153.1	WP_031563360.1	YP_094415.1	WP_040536166.1	WP_019233403.1	WP_028381356.1	WP_028385505.1	WP_003633016.1	WP_027272100.1	hypothetical protein [Legionella oakridgensis]	Persistence and stress-resistance antitoxin PasI	hypothetical protein [Legionella geestiana]	hypothetical protein [Legionella norrlandica]	hypothetical protein [Legionella fairfieldensis]	hypothetical protein [Legionella lansingensis]	hypothetical protein [Legionella shakespearei]	hypothetical protein [Legionella wadsworthii]	hypothetical protein lpg0371 [Legionella pneumophila subsp. pneumophila str. Philadelphia 1]	hypothetical protein [Legionella drancourtii]	hypothetical protein [Legionella anisa]	hypothetical protein [Legionella cherrii]	hypothetical protein [Legionella moravica]	hypothetical protein [Legionella longbeachae]	hypothetical protein [Legionella sainthelensi]
WP_025384913.1	lpari_02327	WP_028385936.1	WP_035890945.1	WP_028388554.1	WP_028373331.1	WP_018577154.1	WP_031563361.1	YP_094416.1	WP_006872279.1	WP_019233404.1	WP_028381355.1	WP_028385504.1	WP_012978810.1	WP_027272101.1	small protein A, tmRNA-binding [Legionella oakridgensis]	Outer membrane protein assembly factor BamE	small protein A, tmRNA-binding [Legionella geestiana]	small protein A, tmRNA-binding [Legionella norrlandica]	small protein A, tmRNA-binding [Legionella fairfieldensis]	small protein A, tmRNA-binding [Legionella lansingensis]	small protein A, tmRNA-binding [Legionella shakespearei]	small protein A, tmRNA-binding [Legionella wadsworthii]	small protein A, tmRNA-binding [Legionella pneumophila subsp. pneumophila str. Philadelphia 1]	hypothetical protein [Legionella drancourtii]	small protein A, tmRNA-binding [Legionella anisa]	small protein A, tmRNA-binding [Legionella cherrii]	small protein A, tmRNA-binding [Legionella moravica]	small protein A, tmRNA-binding [Legionella longbeachae]	small protein A, tmRNA-binding [Legionella sainthelensi]
WP_025384923.1	lpari_02825	WP_028386268.1	WP_035890101.1	WP_035918307.1	WP_028373348.1	WP_018577167.1	WP_031563386.1	YP_094429.1	WP_006872299.1	WP_019233427.1	WP_028381330.1	WP_028385484.1	WP_003632984.1	WP_027270745.1	LemA family protein [Legionella oakridgensis]	hypothetical protein	LemA family protein [Legionella geestiana]	LemA family protein [Legionella norrlandica]	LemA family protein [Legionella fairfieldensis]	LemA family protein [Legionella lansingensis]	LemA family protein [Legionella shakespearei]	LemA family protein [Legionella wadsworthii]	LemA protein [Legionella pneumophila subsp. pneumophila str. Philadelphia 1]	LemA protein [Legionella drancourtii]	LemA family protein [Legionella anisa]	LemA family protein [Legionella cherrii]	LemA family protein [Legionella moravica]	LemA protein [Legionella longbeachae]	LemA family protein [Legionella sainthelensi]
WP_025384924.1	lpari_02824	WP_028386269.1	WP_035890102.1	WP_028388571.1	WP_028373349.1	WP_018577168.1	WP_031563388.1	YP_094430.1	WP_006872300.1	WP_019233428.1	WP_028381329.1	WP_028385483.1	WP_003632983.1	WP_027270746.1	heat-shock protein HtpX [Legionella oakridgensis]	hypothetical protein	heat-shock protein HtpX [Legionella geestiana]	heat-shock protein HtpX [Legionella norrlandica]	heat-shock protein HtpX [Legionella fairfieldensis]	heat-shock protein HtpX [Legionella lansingensis]	heat-shock protein HtpX [Legionella shakespearei]	heat-shock protein HtpX [Legionella wadsworthii]	heat shock protein HtpX [Legionella pneumophila subsp. pneumophila str. Philadelphia 1]	heat-shock protein HtpX [Legionella drancourtii]	heat-shock protein HtpX [Legionella anisa]	heat-shock protein HtpX [Legionella cherrii]	heat-shock protein HtpX [Legionella moravica]	heat-shock protein HtpX [Legionella longbeachae]	heat-shock protein HtpX [Legionella sainthelensi]
WP_025384925.1	lpari_02819	WP_028386858.1	WP_035890103.1	WP_028388575.1	WP_028373790.1	WP_018577170.1	WP_031563400.1	YP_094432.1	WP_006872305.1	WP_019233434.1	WP_028381324.1	WP_028385480.1	WP_003635068.1	WP_027269559.1	ABC transporter [Legionella oakridgensis]	Daunorubicin/doxorubicin resistance ATP-binding protein DrrA	ABC transporter [Legionella geestiana]	ABC transporter [Legionella norrlandica]	ABC transporter [Legionella fairfieldensis]	ABC transporter [Legionella lansingensis]	ABC transporter [Legionella shakespearei]	ABC transporter [Legionella wadsworthii]	ABC transporter ATP-binding protein [Legionella pneumophila subsp. pneumophila str. Philadelphia 1]	ABC transporter [Legionella drancourtii]	ABC transporter [Legionella anisa]	ABC transporter [Legionella cherrii]	ABC transporter [Legionella moravica]	ABC transporter [Legionella longbeachae]	ABC transporter [Legionella sainthelensi]
WP_025384929.1	lpari_02818	WP_035903052.1	WP_035890106.1	WP_051555159.1	WP_028373787.1	WP_018577106.1	WP_031563402.1	YP_094435.1	WP_006872312.1	WP_019233435.1	WP_028381323.1	WP_051190757.1	WP_003635055.1	WP_027269554.1	hypothetical protein [Legionella oakridgensis]	hypothetical protein	hypothetical protein [Legionella geestiana]	SM-20-like protein [Legionella norrlandica]	SM-20-like protein [Legionella fairfieldensis]	hypothetical protein [Legionella lansingensis]	hypothetical protein [Legionella shakespearei]	hypothetical protein [Legionella wadsworthii]	SM20-like protein [Legionella pneumophila subsp. pneumophila str. Philadelphia 1]	hypothetical protein [Legionella drancourtii]	hypothetical protein [Legionella anisa]	hypothetical protein [Legionella cherrii]	SM-20-like protein [Legionella moravica]	hypothetical protein [Legionella longbeachae]	hypothetical protein [Legionella sainthelensi]
WP_025384930.1	lpari_01406	WP_028387511.1	WP_035890116.1	WP_028388582.1	WP_028373779.1	WP_018577100.1	WP_031563431.1	YP_094439.1	WP_006872317.1	WP_019233442.1	WP_028381313.1	WP_028383609.1	WP_003635029.1	WP_027269547.1	50S ribosomal protein L19 [Legionella oakridgensis]	50S ribosomal protein L19	50S ribosomal protein L19 [Legionella geestiana]	50S ribosomal protein L19 [Legionella norrlandica]	50S ribosomal protein L19 [Legionella fairfieldensis]	50S ribosomal protein L19 [Legionella lansingensis]	50S ribosomal protein L19 [Legionella shakespearei]	50S ribosomal protein L19 [Legionella wadsworthii]	50S ribosomal protein L19 [Legionella pneumophila subsp. pneumophila str. Philadelphia 1]	50S ribosomal protein L19 [Legionella drancourtii]	50S ribosomal protein L19 [Legionella anisa]	50S ribosomal protein L19 [Legionella cherrii]	50S ribosomal protein L19 [Legionella moravica]	50S ribosomal protein L19 [Legionella longbeachae]	50S ribosomal protein L19 [Legionella sainthelensi]
WP_025384935.1	lpari_03442	WP_028386272.1	WP_035886745.1	WP_028388588.1	WP_035915846.1	WP_018578636.1	WP_031567216.1	YP_096761.1	WP_006872675.1	WP_019232933.1	WP_028381761.1	WP_028382695.1	WP_003633332.1	WP_027272549.1	hypothetical protein [Legionella oakridgensis]	Hemolysin C	hypothetical protein [Legionella geestiana]	hypothetical protein [Legionella norrlandica]	hypothetical protein [Legionella fairfieldensis]	hypothetical protein [Legionella lansingensis]	membrane protein [Legionella shakespearei]	hypothetical protein [Legionella wadsworthii]	Mg2+ and Co2+ transporter CorB, hemolysin [Legionella pneumophila subsp. pneumophila str. Philadelphia 1]	membrane protein [Legionella drancourtii]	membrane protein [Legionella anisa]	hypothetical protein [Legionella cherrii]	hypothetical protein [Legionella moravica]	membrane protein [Legionella longbeachae]	hypothetical protein [Legionella sainthelensi]
WP_025384939.1	lpari_03448	WP_028386855.1	WP_035886760.1	WP_028388591.1	WP_028373767.1	WP_018578086.1	WP_031567223.1	YP_096755.1	WP_040536396.1	WP_019232939.1	WP_028381766.1	WP_035921093.1	WP_041819221.1	WP_035906707.1	serine/threonine protein kinase [Legionella oakridgensis]	hypothetical protein	serine/threonine protein kinase [Legionella geestiana]	serine/threonine protein kinase [Legionella norrlandica]	serine/threonine protein kinase [Legionella fairfieldensis]	serine/threonine protein kinase [Legionella lansingensis]	hypothetical protein [Legionella shakespearei]	serine/threonine protein kinase [Legionella wadsworthii]	hypothetical protein lpg2757 [Legionella pneumophila subsp. pneumophila str. Philadelphia 1]	serine/threonine protein kinase [Legionella drancourtii]	serine/threonine protein kinase [Legionella anisa]	serine/threonine protein kinase [Legionella cherrii]	serine/threonine protein kinase [Legionella moravica]	serine/threonine protein kinase [Legionella longbeachae]	serine/threonine protein kinase [Legionella sainthelensi]
WP_025384940.1	lpari_03449	WP_051550971.1	WP_035886764.1	WP_028388592.1	WP_028373766.1	WP_018578087.1	WP_031567225.1	YP_096754.1	WP_006872682.1	WP_019232940.1	WP_028381767.1	WP_028382687.1	WP_003633328.1	WP_027272553.1	recombination protein RecR [Legionella oakridgensis]	Recombination protein RecR	recombination protein RecR [Legionella geestiana]	recombination protein RecR [Legionella norrlandica]	recombination protein RecR [Legionella fairfieldensis]	recombination protein RecR [Legionella lansingensis]	recombinase RecR [Legionella shakespearei]	recombination protein RecR [Legionella wadsworthii]	recombination protein RecR [Legionella pneumophila subsp. pneumophila str. Philadelphia 1]	recombinase RecR [Legionella drancourtii]	recombinase RecR [Legionella anisa]	recombination protein RecR [Legionella cherrii]	recombination protein RecR [Legionella moravica]	recombinase RecR [Legionella longbeachae]	recombination protein RecR [Legionella sainthelensi]
WP_025384942.1	lpari_02901	WP_028386853.1	WP_035886776.1	WP_028388594.1	WP_028373764.1	WP_018578089.1	WP_031567229.1	YP_096752.1	WP_006872684.1	WP_040522194.1	WP_028381769.1	WP_028382685.1	WP_003633326.1	WP_027272554.1	DNA polymerase III subunit gamma/tau [Legionella oakridgensis]	DNA polymerase III subunit tau	DNA polymerase III subunit gamma/tau [Legionella geestiana]	DNA polymerase III subunit gamma/tau, partial [Legionella norrlandica]	DNA polymerase III subunit gamma/tau [Legionella fairfieldensis]	DNA polymerase III subunit gamma/tau [Legionella lansingensis]	DNA polymerase III subunit gamma/tau [Legionella shakespearei]	DNA polymerase III subunit gamma/tau [Legionella wadsworthii]	DNA polymerase III subunits gamma and tau [Legionella pneumophila subsp. pneumophila str. Philadelphia 1]	DNA polymerase III subunit gamma/tau [Legionella drancourtii]	DNA polymerase III subunit gamma/tau [Legionella anisa]	DNA polymerase III subunit gamma/tau [Legionella cherrii]	DNA polymerase III subunit gamma/tau [Legionella moravica]	DNA polymerase III subunit gamma/tau [Legionella longbeachae]	DNA polymerase III subunit gamma/tau [Legionella sainthelensi]
WP_025384946.1	lpari_01967	WP_028387325.1	WP_035891173.1	WP_028388666.1	WP_028373217.1	WP_018575941.1	WP_031563260.1	YP_096746.1	WP_006872150.1	WP_019234636.1	WP_028380686.1	WP_028383393.1	WP_003633322.1	WP_027270850.1	ribosome biogenesis GTPase RsgA [Legionella oakridgensis]	Putative ribosome biogenesis GTPase RsgA	hypothetical protein [Legionella geestiana]	ribosome biogenesis GTPase RsgA [Legionella norrlandica]	ribosome biogenesis GTPase RsgA [Legionella fairfieldensis]	ribosome biogenesis GTPase RsgA [Legionella lansingensis]	ribosome biogenesis GTPase RsgA [Legionella shakespearei]	ribosome biogenesis GTPase RsgA [Legionella wadsworthii]	EngC GTPase [Legionella pneumophila subsp. pneumophila str. Philadelphia 1]	ribosome biogenesis GTPase RsgA [Legionella drancourtii]	ribosome biogenesis GTPase RsgA [Legionella anisa]	ribosome biogenesis GTPase RsgA [Legionella cherrii]	ribosome biogenesis GTPase RsgA [Legionella moravica]	ribosome biogenesis GTPase RsgA [Legionella longbeachae]	ribosome biogenesis GTPase RsgA [Legionella sainthelensi]
WP_025384948.1	lpari_01965	WP_028387323.1	WP_035891175.1	WP_028388664.1	WP_028373215.1	WP_018575943.1	WP_031563256.1	YP_096744.1	WP_006872148.1	WP_019234634.1	WP_028380688.1	WP_028383391.1	WP_003633320.1	WP_027270852.1	oligoribonuclease [Legionella oakridgensis]	Oligoribonuclease	oligoribonuclease [Legionella geestiana]	oligoribonuclease [Legionella norrlandica]	oligoribonuclease [Legionella fairfieldensis]	oligoribonuclease [Legionella lansingensis]	oligoribonuclease [Legionella shakespearei]	oligoribonuclease [Legionella wadsworthii]	oligoribonuclease [Legionella pneumophila subsp. pneumophila str. Philadelphia 1]	oligoribonuclease [Legionella drancourtii]	oligoribonuclease [Legionella anisa]	oligoribonuclease [Legionella cherrii]	oligoribonuclease [Legionella moravica]	oligoribonuclease [Legionella longbeachae]	oligoribonuclease [Legionella sainthelensi]
WP_025384954.1	lpari_01961	WP_051551055.1	WP_035891182.1	WP_028388660.1	WP_028373211.1	WP_018575951.1	WP_031563241.1	YP_096740.1	WP_006872143.1	WP_019234630.1	WP_028380692.1	WP_028383387.1	WP_003633304.1	WP_027270859.1	hypothetical protein [Legionella oakridgensis]	Putative uroporphyrinogen-III C-methyltransferase	hypothetical protein [Legionella geestiana]	uroporphyrin-III methyltransferase [Legionella norrlandica]	hypothetical protein [Legionella fairfieldensis]	hypothetical protein [Legionella lansingensis]	hypothetical protein [Legionella shakespearei]	uroporphyrin-III methyltransferase [Legionella wadsworthii]	uroporphyrinogen III methylase [Legionella pneumophila subsp. pneumophila str. Philadelphia 1]	uroporphyrin-III methyltransferase [Legionella drancourtii]	hypothetical protein [Legionella anisa]	uroporphyrin-III methyltransferase [Legionella cherrii]	uroporphyrin-III methyltransferase [Legionella moravica]	uroporphyrin-III methyltransferase [Legionella longbeachae]	uroporphyrin-III methyltransferase [Legionella sainthelensi]
WP_025384955.1	lpari_01960	WP_028387319.1	WP_035891184.1	WP_028388659.1	WP_028373210.1	WP_018575952.1	WP_031563244.1	YP_096739.1	WP_006872142.1	WP_019234629.1	WP_028380693.1	WP_028383386.1	WP_003633303.1	WP_027270860.1	hypothetical protein [Legionella oakridgensis]	Uroporphyrinogen-III synthase	hypothetical protein [Legionella geestiana]	uroporphyrinogen III methyltransferase [Legionella norrlandica]	hypothetical protein [Legionella fairfieldensis]	hypothetical protein [Legionella lansingensis]	hypothetical protein [Legionella shakespearei]	uroporphyrinogen III methyltransferase [Legionella wadsworthii]	uroporphyrinogen III methylase [Legionella pneumophila subsp. pneumophila str. Philadelphia 1]	uroporphyrinogen III methyltransferase [Legionella drancourtii]	uroporphyrinogen III methyltransferase [Legionella anisa]	uroporphyrinogen III methyltransferase [Legionella cherrii]	uroporphyrinogen III methyltransferase [Legionella moravica]	uroporphyrinogen III methyltransferase [Legionella longbeachae]	uroporphyrinogen III methyltransferase [Legionella sainthelensi]
WP_025384956.1	lpari_01959	WP_028387318.1	WP_035891190.1	WP_028388658.1	WP_028373209.1	WP_018575953.1	WP_031563247.1	YP_096738.1	WP_006872141.1	WP_019234628.1	WP_028380694.1	WP_028383385.1	WP_003633302.1	WP_027270861.1	porphobilinogen deaminase [Legionella oakridgensis]	Porphobilinogen deaminase	porphobilinogen deaminase [Legionella geestiana]	porphobilinogen deaminase [Legionella norrlandica]	porphobilinogen deaminase [Legionella fairfieldensis]	porphobilinogen deaminase [Legionella lansingensis]	hypothetical protein [Legionella shakespearei]	porphobilinogen deaminase [Legionella wadsworthii]	porphobilinogen deaminase [Legionella pneumophila subsp. pneumophila str. Philadelphia 1]	porphobilinogen deaminase [Legionella drancourtii]	porphobilinogen deaminase [Legionella anisa]	porphobilinogen deaminase [Legionella cherrii]	porphobilinogen deaminase [Legionella moravica]	porphobilinogen deaminase [Legionella longbeachae]	porphobilinogen deaminase [Legionella sainthelensi]
WP_025384958.1	lpari_01956	WP_028385904.1	WP_035889247.1	WP_028388239.1	WP_028373206.1	WP_018575958.1	WP_031563231.1	YP_096733.1	WP_006872139.1	WP_019234624.1	WP_028380697.1	WP_028383380.1	WP_003633296.1	WP_027270864.1	cytochrome C [Legionella oakridgensis]	Cytochrome c5	cytochrome C [Legionella geestiana]	cytochrome C [Legionella norrlandica]	cytochrome C [Legionella fairfieldensis]	cytochrome C [Legionella lansingensis]	hypothetical protein [Legionella shakespearei]	cytochrome C [Legionella wadsworthii]	cytochrome c5 [Legionella pneumophila subsp. pneumophila str. Philadelphia 1]	cytochrome C [Legionella drancourtii]	cytochrome C [Legionella anisa]	cytochrome C [Legionella cherrii]	cytochrome C [Legionella moravica]	cytochrome C [Legionella longbeachae]	cytochrome C [Legionella sainthelensi]
WP_025384960.1	lpari_01953	WP_028385902.1	WP_035889250.1	WP_028388241.1	WP_028373204.1	WP_026253820.1	WP_031563224.1	YP_096731.1	WP_040536025.1	WP_019234621.1	WP_028380700.1	WP_028383378.1	WP_003633290.1	WP_027270867.1	queuine tRNA-ribosyltransferase [Legionella oakridgensis]	Queuine tRNA-ribosyltransferase	queuine tRNA-ribosyltransferase [Legionella geestiana]	queuine tRNA-ribosyltransferase [Legionella norrlandica]	queuine tRNA-ribosyltransferase [Legionella fairfieldensis]	queuine tRNA-ribosyltransferase [Legionella lansingensis]	queuine tRNA-ribosyltransferase [Legionella shakespearei]	queuine tRNA-ribosyltransferase [Legionella wadsworthii]	queuine/archaeosine tRNA-ribosyltransferase [Legionella pneumophila subsp. pneumophila str. Philadelphia 1]	queuine tRNA-ribosyltransferase [Legionella drancourtii]	queuine tRNA-ribosyltransferase [Legionella anisa]	queuine tRNA-ribosyltransferase [Legionella cherrii]	queuine tRNA-ribosyltransferase [Legionella moravica]	queuine tRNA-ribosyltransferase [Legionella longbeachae]	queuine tRNA-ribosyltransferase [Legionella sainthelensi]
WP_025384961.1	lpari_01952	WP_028385901.1	WP_035889251.1	WP_028388242.1	WP_028373203.1	WP_018575961.1	WP_031563221.1	YP_096730.1	WP_006872135.1	WP_019234620.1	WP_028380701.1	WP_028383377.1	WP_003633287.1	WP_027270868.1	peptidylprolyl isomerase [Legionella oakridgensis]	Peptidyl-prolyl cis-trans isomerase B	peptidylprolyl isomerase [Legionella geestiana]	peptidylprolyl isomerase [Legionella norrlandica]	peptidylprolyl isomerase [Legionella fairfieldensis]	peptidylprolyl isomerase [Legionella lansingensis]	peptidyl-prolyl cis-trans isomerase [Legionella shakespearei]	peptidylprolyl isomerase [Legionella wadsworthii]	peptidylprolyl cis-trans isomerase B (cyclophilin-type) Lcy [Legionella pneumophila subsp. pneumophila str. Philadelphia 1]	peptidyl-prolyl cis-trans isomerase [Legionella drancourtii]	peptidyl-prolyl cis-trans isomerase [Legionella anisa]	peptidylprolyl isomerase [Legionella cherrii]	peptidylprolyl isomerase [Legionella moravica]	peptidyl-prolyl cis-trans isomerase [Legionella longbeachae]	peptidylprolyl isomerase [Legionella sainthelensi]
WP_025384966.1	lpari_01401	WP_028386794.1	WP_035890124.1	WP_028388235.1	WP_028373223.1	WP_018577092.1	WP_031563442.1	YP_094448.1	WP_006872325.1	WP_019233447.1	WP_028381308.1	WP_028383615.1	WP_003635014.1	WP_027269542.1	transporter [Legionella oakridgensis]	Glutamate/gamma-aminobutyrate antiporter	transporter [Legionella geestiana]	transporter [Legionella norrlandica]	transporter [Legionella fairfieldensis]	transporter [Legionella lansingensis]	transporter [Legionella shakespearei]	transporter [Legionella wadsworthii]	amino acid antiporter [Legionella pneumophila subsp. pneumophila str. Philadelphia 1]	transporter [Legionella drancourtii]	transporter [Legionella anisa]	transporter [Legionella cherrii]	transporter [Legionella moravica]	transporter [Legionella longbeachae]	transporter [Legionella sainthelensi]
WP_025384973.1	lpari_01970	WP_035901822.1	WP_035890750.1	WP_028388232.1	WP_028372652.1	WP_018576020.1	WP_031563109.1	YP_096667.1	WP_006872057.1	WP_019234573.1	WP_028380746.1	WP_028383308.1	WP_012978782.1	WP_027270920.1	pantothenate synthetase [Legionella oakridgensis]	Pantothenate synthetase	pantothenate synthetase [Legionella geestiana]	pantothenate synthetase [Legionella norrlandica]	pantothenate synthetase [Legionella fairfieldensis]	pantothenate synthetase [Legionella lansingensis]	pantothenate synthetase [Legionella shakespearei]	pantothenate synthetase [Legionella wadsworthii]	pantoate-beta-alanine ligase [Legionella pneumophila subsp. pneumophila str. Philadelphia 1]	pantothenate synthetase [Legionella drancourtii]	pantothenate synthetase [Legionella anisa]	pantothenate synthetase [Legionella cherrii]	pantothenate synthetase [Legionella moravica]	pantothenate synthetase [Legionella longbeachae]	pantothenate synthetase [Legionella sainthelensi]
WP_025384974.1	lpari_02976	WP_028385890.1	WP_035890749.1	WP_028388231.1	WP_028372651.1	WP_018576021.1	WP_031563107.1	YP_096666.1	WP_006872056.1	WP_019234572.1	WP_028380747.1	WP_028383307.1	WP_003633220.1	WP_027270921.1	3-methyl-2-oxobutanoate hydroxymethyltransferase [Legionella oakridgensis]	3-methyl-2-oxobutanoate hydroxymethyltransferase	3-methyl-2-oxobutanoate hydroxymethyltransferase [Legionella geestiana]	3-methyl-2-oxobutanoate hydroxymethyltransferase [Legionella norrlandica]	3-methyl-2-oxobutanoate hydroxymethyltransferase [Legionella fairfieldensis]	3-methyl-2-oxobutanoate hydroxymethyltransferase [Legionella lansingensis]	3-methyl-2-oxobutanoate hydroxymethyltransferase [Legionella shakespearei]	3-methyl-2-oxobutanoate hydroxymethyltransferase [Legionella wadsworthii]	3-methyl-2-oxobutanoate hydroxymethyltransferase [Legionella pneumophila subsp. pneumophila str. Philadelphia 1]	3-methyl-2-oxobutanoate hydroxymethyltransferase [Legionella drancourtii]	3-methyl-2-oxobutanoate hydroxymethyltransferase [Legionella anisa]	3-methyl-2-oxobutanoate hydroxymethyltransferase [Legionella cherrii]	3-methyl-2-oxobutanoate hydroxymethyltransferase [Legionella moravica]	3-methyl-2-oxobutanoate hydroxymethyltransferase [Legionella longbeachae]	3-methyl-2-oxobutanoate hydroxymethyltransferase [Legionella sainthelensi]
WP_025384975.1	lpari_02974	WP_028385888.1	WP_035890748.1	WP_028388230.1	WP_028372650.1	WP_018576030.1	WP_031563105.1	YP_096665.1	WP_006872051.1	WP_019234570.1	WP_028380750.1	WP_028383303.1	WP_003633218.1	WP_027270922.1	membrane protein [Legionella oakridgensis]	hypothetical protein	membrane protein [Legionella geestiana]	membrane protein [Legionella norrlandica]	membrane protein [Legionella fairfieldensis]	membrane protein [Legionella lansingensis]	hypothetical protein [Legionella shakespearei]	membrane protein [Legionella wadsworthii]	transmembrane protein [Legionella pneumophila subsp. pneumophila str. Philadelphia 1]	membrane protein [Legionella drancourtii]	membrane protein [Legionella anisa]	membrane protein [Legionella cherrii]	membrane protein [Legionella moravica]	membrane protein [Legionella longbeachae]	membrane protein [Legionella sainthelensi]
WP_025384981.1	lpari_02964	WP_028385884.1	WP_035889623.1	WP_028388221.1	WP_028372639.1	WP_026253833.1	WP_031563086.1	YP_094571.1	WP_006872043.1	WP_019234562.1	WP_028380757.1	WP_028383295.1	WP_003633212.1	WP_027270928.1	succinate dehydrogenase [Legionella oakridgensis]	Succinate dehydrogenase cytochrome b556 subunit	succinate dehydrogenase [Legionella geestiana]	succinate dehydrogenase [Legionella norrlandica]	succinate dehydrogenase [Legionella fairfieldensis]	succinate dehydrogenase [Legionella lansingensis]	succinate dehydrogenase [Legionella shakespearei]	succinate dehydrogenase [Legionella wadsworthii]	succinate dehydrogenase cytochrome b556 subunit C [Legionella pneumophila subsp. pneumophila str. Philadelphia 1]	succinate dehydrogenase [Legionella drancourtii]	succinate dehydrogenase [Legionella anisa]	succinate dehydrogenase [Legionella cherrii]	succinate dehydrogenase [Legionella moravica]	succinate dehydrogenase [Legionella longbeachae]	succinate dehydrogenase [Legionella sainthelensi]
WP_025384982.1	lpari_02963	WP_028385883.1	WP_035889622.1	WP_028388220.1	WP_028372638.1	WP_018576057.1	WP_031563084.1	YP_094572.1	WP_006872042.1	WP_019234561.1	WP_028380758.1	WP_028383294.1	WP_003633211.1	WP_027270929.1	succinate dehydrogenase [Legionella oakridgensis]	Succinate dehydrogenase hydrophobic membrane anchor subunit	succinate dehydrogenase [Legionella geestiana]	succinate dehydrogenase [Legionella norrlandica]	succinate dehydrogenase [Legionella fairfieldensis]	succinate dehydrogenase [Legionella lansingensis]	succinate dehydrogenase [Legionella shakespearei]	succinate dehydrogenase [Legionella wadsworthii]	succinate dehydrogenase hydrophobic membrane anchor protein subunit D [Legionella pneumophila subsp. pneumophila str. Philadelphia 1]	succinate dehydrogenase [Legionella drancourtii]	succinate dehydrogenase [Legionella anisa]	succinate dehydrogenase [Legionella cherrii]	succinate dehydrogenase [Legionella moravica]	succinate dehydrogenase [Legionella longbeachae]	succinate dehydrogenase [Legionella sainthelensi]
WP_025384985.1	lpari_02959	WP_028385879.1	WP_035891233.1	WP_028388216.1	WP_028372634.1	WP_018576061.1	WP_031563075.1	YP_094576.1	WP_006872038.1	WP_019234558.1	WP_028380762.1	WP_028383290.1	WP_003633204.1	WP_027270933.1	dihydrolipoamide succinyltransferase [Legionella oakridgensis]	Dihydrolipoyllysine-residue succinyltransferase component of 2-oxoglutarate dehydrogenase complex	dihydrolipoamide succinyltransferase [Legionella geestiana]	dihydrolipoamide succinyltransferase [Legionella norrlandica]	dihydrolipoamide succinyltransferase [Legionella fairfieldensis]	dihydrolipoamide succinyltransferase [Legionella lansingensis]	dihydrolipoamide succinyltransferase [Legionella shakespearei]	dihydrolipoamide succinyltransferase [Legionella wadsworthii]	dihydrolipoamide succinyltransferase [Legionella pneumophila subsp. pneumophila str. Philadelphia 1]	dihydrolipoamide succinyltransferase [Legionella drancourtii]	dihydrolipoamide succinyltransferase [Legionella anisa]	dihydrolipoamide succinyltransferase [Legionella cherrii]	dihydrolipoamide succinyltransferase [Legionella moravica]	dihydrolipoamide succinyltransferase [Legionella longbeachae]	dihydrolipoamide succinyltransferase [Legionella sainthelensi]
WP_025384987.1	lpari_02957	WP_028385877.1	WP_035891231.1	WP_028388214.1	WP_028372632.1	WP_018576063.1	WP_031563071.1	YP_094578.1	WP_006872036.1	WP_019234556.1	WP_028380764.1	WP_028383288.1	WP_003633201.1	WP_027270935.1	succinyl-CoA synthetase subunit alpha [Legionella oakridgensis]	Succinyl-CoA ligase [ADP-forming] subunit alpha	succinyl-CoA synthetase subunit alpha [Legionella geestiana]	succinyl-CoA synthetase subunit alpha [Legionella norrlandica]	succinyl-CoA synthetase subunit alpha [Legionella fairfieldensis]	succinyl-CoA synthetase subunit alpha [Legionella lansingensis]	succinyl-CoA synthetase subunit alpha [Legionella shakespearei]	succinyl-CoA synthetase subunit alpha [Legionella wadsworthii]	succinyl CoA synthetase alpha chain [Legionella pneumophila subsp. pneumophila str. Philadelphia 1]	succinyl-CoA synthetase subunit alpha [Legionella drancourtii]	succinyl-CoA synthetase subunit alpha [Legionella anisa]	succinyl-CoA synthetase subunit alpha [Legionella cherrii]	succinyl-CoA synthetase subunit alpha [Legionella moravica]	succinyl-CoA synthetase subunit alpha [Legionella longbeachae]	succinyl-CoA synthetase subunit alpha [Legionella sainthelensi]
WP_025384988.1	lpari_02956	WP_028386663.1	WP_035891221.1	WP_028388206.1	WP_028372628.1	WP_018576064.1	WP_031563069.1	YP_094579.1	WP_006872035.1	WP_019234555.1	WP_028380765.1	WP_028383287.1	WP_003633199.1	WP_027270936.1	pyridoxine 5'-phosphate oxidase [Legionella oakridgensis]	Pyridoxine/pyridoxamine 5'-phosphate oxidase	pyridoxine 5'-phosphate oxidase [Legionella geestiana]	pyridoxine 5'-phosphate oxidase [Legionella norrlandica]	pyridoxine 5'-phosphate oxidase [Legionella fairfieldensis]	pyridoxine 5'-phosphate oxidase [Legionella lansingensis]	pyridoxamine 5'-phosphate oxidase [Legionella shakespearei]	pyridoxine 5'-phosphate oxidase [Legionella wadsworthii]	pyridoxamine 5'-phosphate oxidase [Legionella pneumophila subsp. pneumophila str. Philadelphia 1]	pyridoxamine 5'-phosphate oxidase [Legionella drancourtii]	pyridoxamine 5'-phosphate oxidase [Legionella anisa]	pyridoxine 5'-phosphate oxidase [Legionella cherrii]	pyridoxine 5'-phosphate oxidase [Legionella moravica]	pyridoxamine 5'-phosphate oxidase [Legionella longbeachae]	pyridoxine 5'-phosphate oxidase [Legionella sainthelensi]
WP_025384989.1	lpari_02955	WP_051550942.1	WP_035891218.1	WP_028388205.1	WP_028372627.1	WP_018576065.1	WP_031563066.1	YP_094580.1	WP_006872034.1	WP_019234554.1	WP_028380766.1	WP_028383286.1	WP_003633197.1	WP_027270937.1	transmission trait enhancer LetE [Legionella oakridgensis]	hypothetical protein	hypothetical protein [Legionella geestiana]	transmission trait enhancer LetE [Legionella norrlandica]	transmission trait enhancer LetE [Legionella fairfieldensis]	transmission trait enhancer LetE [Legionella lansingensis]	transmission trait enhancer LetE [Legionella shakespearei]	transmission trait enhancer LetE [Legionella wadsworthii]	transmission trait enhancer LetE [Legionella pneumophila subsp. pneumophila str. Philadelphia 1]	hypothetical protein [Legionella drancourtii]	transmission trait enhancer LetE [Legionella anisa]	transmission trait enhancer LetE [Legionella cherrii]	transmission trait enhancer LetE [Legionella moravica]	transmission trait enhancer LetE [Legionella longbeachae]	transmission trait enhancer LetE [Legionella sainthelensi]
WP_025384990.1	lpari_02954	WP_028386665.1	WP_035891217.1	WP_028388204.1	WP_028372626.1	WP_018576066.1	WP_031563064.1	YP_094582.1	WP_006872033.1	WP_019234553.1	WP_028380767.1	WP_028383285.1	WP_003633196.1	WP_027270938.1	Fe-S center protein [Legionella oakridgensis]	hypothetical protein	Fe-S center protein [Legionella geestiana]	Fe-S center protein [Legionella norrlandica]	Fe-S center protein [Legionella fairfieldensis]	Fe-S center protein [Legionella lansingensis]	Fe-S center protein [Legionella shakespearei]	Fe-S center protein [Legionella wadsworthii]	hypothetical protein lpg0539 [Legionella pneumophila subsp. pneumophila str. Philadelphia 1]	Fe-S center protein [Legionella drancourtii]	Fe-S center protein [Legionella anisa]	Fe-S center protein [Legionella cherrii]	Fe-S center protein [Legionella moravica]	Fe-S center protein [Legionella longbeachae]	Fe-S center protein [Legionella sainthelensi]
WP_025384992.1	lpari_02953	WP_028386094.1	WP_052117680.1	WP_035918101.1	WP_028372625.1	WP_018576067.1	WP_031563062.1	YP_094583.1	WP_006872032.1	WP_019234552.1	WP_028380768.1	WP_035921333.1	WP_003633195.1	WP_035906001.1	MFS transporter [Legionella oakridgensis]	putative sulfoacetate transporter SauU	MFS transporter [Legionella geestiana]	MFS transporter [Legionella norrlandica]	MFS transporter [Legionella fairfieldensis]	MFS transporter [Legionella lansingensis]	MFS transporter [Legionella shakespearei]	MFS transporter [Legionella wadsworthii]	major facilitator family transporter [Legionella pneumophila subsp. pneumophila str. Philadelphia 1]	MFS transporter [Legionella drancourtii]	MFS transporter [Legionella anisa]	MFS transporter [Legionella cherrii]	MFS transporter [Legionella moravica]	MFS transporter [Legionella longbeachae]	MFS transporter [Legionella sainthelensi]
WP_025384993.1	lpari_02952	WP_028386093.1	WP_035891214.1	WP_028388202.1	WP_028372624.1	WP_018576069.1	WP_031563061.1	YP_094584.1	WP_006872030.1	WP_019234551.1	WP_028380769.1	WP_028383283.1	WP_003633194.1	WP_027270940.1	hypothetical protein [Legionella oakridgensis]	hypothetical protein	hypothetical protein [Legionella geestiana]	hypothetical protein [Legionella norrlandica]	hypothetical protein [Legionella fairfieldensis]	hypothetical protein [Legionella lansingensis]	hypothetical protein [Legionella shakespearei]	hypothetical protein [Legionella wadsworthii]	hypothetical protein lpg0541 [Legionella pneumophila subsp. pneumophila str. Philadelphia 1]	hypothetical protein [Legionella drancourtii]	hypothetical protein [Legionella anisa]	hypothetical protein [Legionella cherrii]	hypothetical protein [Legionella moravica]	hypothetical protein [Legionella longbeachae]	hypothetical protein [Legionella sainthelensi]
WP_025384995.1	lpari_02950	WP_028386091.1	WP_035891479.1	WP_028388199.1	WP_028372622.1	WP_018576074.1	WP_031563057.1	YP_094586.1	WP_006872028.1	WP_019234550.1	WP_028380770.1	WP_028383281.1	WP_003633191.1	WP_027270941.1	ribose-phosphate pyrophosphokinase [Legionella oakridgensis]	Ribose-phosphate pyrophosphokinase	ribose-phosphate pyrophosphokinase [Legionella geestiana]	ribose-phosphate pyrophosphokinase [Legionella norrlandica]	ribose-phosphate pyrophosphokinase [Legionella fairfieldensis]	ribose-phosphate pyrophosphokinase [Legionella lansingensis]	ribose-phosphate pyrophosphokinase [Legionella shakespearei]	ribose-phosphate pyrophosphokinase [Legionella wadsworthii]	ribose-phosphate pyrophosphokinase [Legionella pneumophila subsp. pneumophila str. Philadelphia 1]	ribose-phosphate pyrophosphokinase [Legionella drancourtii]	ribose-phosphate pyrophosphokinase [Legionella anisa]	ribose-phosphate pyrophosphokinase [Legionella cherrii]	ribose-phosphate pyrophosphokinase [Legionella moravica]	ribose-phosphate pyrophosphokinase [Legionella longbeachae]	ribose-phosphate pyrophosphokinase [Legionella sainthelensi]
WP_025384997.1	lpari_02945	WP_028386082.1	WP_035891483.1	WP_028388194.1	WP_028372618.1	WP_018576089.1	WP_031563049.1	YP_094593.1	WP_006872021.1	WP_040523015.1	WP_028380774.1	WP_028383277.1	WP_003633182.1	WP_027270945.1	glycerol acyltransferase [Legionella oakridgensis]	1-acyl-sn-glycerol-3-phosphate acyltransferase	glycerol acyltransferase [Legionella geestiana]	glycerol acyltransferase [Legionella norrlandica]	glycerol acyltransferase [Legionella fairfieldensis]	glycerol acyltransferase [Legionella lansingensis]	glycerol acyltransferase [Legionella shakespearei]	glycerol acyltransferase [Legionella wadsworthii]	1-acyl-sn-glycerol-3-phosphate acyltransferase [Legionella pneumophila subsp. pneumophila str. Philadelphia 1]	glycerol acyltransferase [Legionella drancourtii]	glycerol acyltransferase [Legionella anisa]	glycerol acyltransferase [Legionella cherrii]	glycerol acyltransferase [Legionella moravica]	glycerol acyltransferase [Legionella longbeachae]	glycerol acyltransferase [Legionella sainthelensi]
WP_025384998.1	lpari_02943	WP_028385569.1	WP_035890906.1	WP_028388193.1	WP_028372617.1	WP_018576091.1	WP_031563044.1	YP_094598.1	WP_006872018.1	WP_019234543.1	WP_028380775.1	WP_028383276.1	WP_003633180.1	WP_027270946.1	hypothetical protein [Legionella oakridgensis]	Formamidopyrimidine-DNA glycosylase	hypothetical protein [Legionella geestiana]	5-hydroxymethyluracil DNA glycosylase [Legionella norrlandica]	5-hydroxymethyluracil DNA glycosylase [Legionella fairfieldensis]	5-hydroxymethyluracil DNA glycosylase [Legionella lansingensis]	hypothetical protein [Legionella shakespearei]	5-hydroxymethyluracil DNA glycosylase [Legionella wadsworthii]	formamidopyrimidine-DNA glycosylase [Legionella pneumophila subsp. pneumophila str. Philadelphia 1]	5-hydroxymethyluracil DNA glycosylase [Legionella drancourtii]	5-hydroxymethyluracil DNA glycosylase [Legionella anisa]	5-hydroxymethyluracil DNA glycosylase [Legionella cherrii]	5-hydroxymethyluracil DNA glycosylase [Legionella moravica]	5-hydroxymethyluracil DNA glycosylase [Legionella longbeachae]	5-hydroxymethyluracil DNA glycosylase [Legionella sainthelensi]
WP_025384999.1	lpari_02941	WP_028386084.1	WP_035890908.1	WP_028388191.1	WP_028372615.1	WP_018576093.1	WP_031563039.1	YP_094599.1	WP_006872016.1	WP_019234541.1	WP_028380777.1	WP_028383274.1	WP_003633176.1	WP_027270948.1	aminotransferase [Legionella oakridgensis]	hypothetical protein	aminotransferase [Legionella geestiana]	aminotransferase [Legionella norrlandica]	aminotransferase [Legionella fairfieldensis]	aminotransferase [Legionella lansingensis]	aminotransferase [Legionella shakespearei]	aminotransferase [Legionella wadsworthii]	stearoyl-CoA-9-desaturase [Legionella pneumophila subsp. pneumophila str. Philadelphia 1]	aminotransferase [Legionella drancourtii]	aminotransferase [Legionella anisa]	aminotransferase [Legionella cherrii]	aminotransferase [Legionella moravica]	aminotransferase [Legionella longbeachae]	aminotransferase [Legionella sainthelensi]
WP_025385001.1	lpari_02937	WP_028386086.1	WP_035890916.1	WP_028388188.1	WP_028372612.1	WP_026253837.1	WP_031563032.1	YP_094603.1	WP_006872011.1	WP_019234538.1	WP_028380780.1	WP_028383267.1	WP_003633169.1	WP_027270951.1	polyhydroxyalkanoate synthesis repressor PhaR [Legionella oakridgensis]	hypothetical protein	hypothetical protein [Legionella geestiana]	polyhydroxyalkanoate synthesis repressor PhaR [Legionella norrlandica]	polyhydroxyalkanoate synthesis repressor PhaR [Legionella fairfieldensis]	polyhydroxyalkanoate synthesis repressor PhaR [Legionella lansingensis]	polyhydroxyalkanoate synthesis repressor PhaR [Legionella shakespearei]	polyhydroxyalkanoate synthesis repressor PhaR [Legionella wadsworthii]	hypothetical protein lpg0562 [Legionella pneumophila subsp. pneumophila str. Philadelphia 1]	polyhydroxyalkanoate synthesis repressor PhaR [Legionella drancourtii]	polyhydroxyalkanoate synthesis repressor PhaR [Legionella anisa]	polyhydroxyalkanoate synthesis repressor PhaR [Legionella cherrii]	polyhydroxyalkanoate synthesis repressor PhaR [Legionella moravica]	polyhydroxyalkanoate synthesis repressor PhaR, partial [Legionella longbeachae]	polyhydroxyalkanoate synthesis repressor PhaR [Legionella sainthelensi]
WP_025385002.1	lpari_02936	WP_028386087.1	WP_035890918.1	WP_028388187.1	WP_028372611.1	WP_018576099.1	WP_031563030.1	YP_094604.1	WP_006872010.1	WP_019234537.1	WP_028380781.1	WP_028383266.1	WP_012978791.1	WP_027270952.1	hypothetical protein [Legionella oakridgensis]	hypothetical protein	hypothetical protein [Legionella geestiana]	hypothetical protein [Legionella norrlandica]	hypothetical protein [Legionella fairfieldensis]	hypothetical protein [Legionella lansingensis]	hypothetical protein [Legionella shakespearei]	hypothetical protein [Legionella wadsworthii]	hypothetical protein lpg0563 [Legionella pneumophila subsp. pneumophila str. Philadelphia 1]	hypothetical protein [Legionella drancourtii]	hypothetical protein [Legionella anisa]	hypothetical protein [Legionella cherrii]	hypothetical protein [Legionella moravica]	hypothetical protein [Legionella longbeachae]	hypothetical protein [Legionella sainthelensi]
WP_025385007.1	lpari_01588	WP_051550967.1	WP_035889276.1	WP_028389647.1	WP_051546091.1	WP_018576039.1	WP_031564093.1	YP_096720.1	WP_006870095.1	WP_019233830.1	WP_028382302.1	WP_028383372.1	WP_012978884.1	WP_027271056.1	hypothetical protein [Legionella oakridgensis]	hypothetical protein	hypothetical protein [Legionella geestiana]	hypothetical protein [Legionella norrlandica]	hypothetical protein [Legionella fairfieldensis]	hypothetical protein [Legionella lansingensis]	hypothetical protein [Legionella shakespearei]	hypothetical protein [Legionella wadsworthii]	hypothetical protein lpg2716 [Legionella pneumophila subsp. pneumophila str. Philadelphia 1]	hypothetical protein [Legionella drancourtii]	hypothetical protein [Legionella anisa]	hypothetical protein [Legionella cherrii]	hypothetical protein [Legionella moravica]	hypothetical protein [Legionella longbeachae]	hypothetical protein [Legionella sainthelensi]
WP_025385008.1	lpari_00176	WP_028386074.1	WP_035886874.1	WP_028388181.1	WP_028372606.1	WP_018578461.1	WP_031563566.1	YP_096623.1	WP_006872387.1	WP_019233510.1	WP_028380951.1	WP_028383174.1	WP_003635184.1	WP_027269614.1	UDP-N-acetylmuramoyl-tripeptide--D-alanyl-D-alanine ligase [Legionella oakridgensis]	UDP-N-acetylmuramoyl-tripeptide--D-alanyl-D-alanine ligase	UDP-N-acetylmuramoyl-tripeptide--D-alanyl-D-alanine ligase [Legionella geestiana]	UDP-N-acetylmuramoyl-tripeptide--D-alanyl-D-alanine ligase [Legionella norrlandica]	UDP-N-acetylmuramoyl-tripeptide--D-alanyl-D-alanine ligase [Legionella fairfieldensis]	UDP-N-acetylmuramoyl-tripeptide--D-alanyl-D-alanine ligase [Legionella lansingensis]	UDP-N-acetylmuramoyl-tripeptide--D-alanyl-D-alanine ligase [Legionella shakespearei]	UDP-N-acetylmuramoyl-tripeptide--D-alanyl-D-alanine ligase [Legionella wadsworthii]	UDP-N-acetylmuramoyl-tripeptide--D-alanyl-D-alanine ligase [Legionella pneumophila subsp. pneumophila str. Philadelphia 1]	UDP-N-acetylmuramoyl-tripeptide--D-alanyl-D-alanine ligase [Legionella drancourtii]	UDP-N-acetylmuramoyl-tripeptide--D-alanyl-D-alanine ligase [Legionella anisa]	UDP-N-acetylmuramoyl-tripeptide--D-alanyl-D-alanine ligase [Legionella cherrii]	UDP-N-acetylmuramoyl-tripeptide--D-alanyl-D-alanine ligase [Legionella moravica]	UDP-N-acetylmuramoyl-tripeptide--D-alanyl-D-alanine ligase [Legionella longbeachae]	UDP-N-acetylmuramoyl-tripeptide--D-alanyl-D-alanine ligase [Legionella sainthelensi]
WP_025385009.1	lpari_00177	WP_028386073.1	WP_035886875.1	WP_028388180.1	WP_028372605.1	WP_018578462.1	WP_031563568.1	YP_096622.1	WP_040536217.1	WP_019233511.1	WP_028380952.1	WP_028383175.1	WP_003635187.1	WP_027269615.1	phospho-N-acetylmuramoyl-pentapeptide transferase [Legionella oakridgensis]	Phospho-N-acetylmuramoyl-pentapeptide-transferase	phospho-N-acetylmuramoyl-pentapeptide transferase [Legionella geestiana]	phospho-N-acetylmuramoyl-pentapeptide transferase [Legionella norrlandica]	phospho-N-acetylmuramoyl-pentapeptide transferase [Legionella fairfieldensis]	phospho-N-acetylmuramoyl-pentapeptide transferase [Legionella lansingensis]	phospho-N-acetylmuramoyl-pentapeptide transferase [Legionella shakespearei]	phospho-N-acetylmuramoyl-pentapeptide transferase [Legionella wadsworthii]	phospho-N-acetylmuramoyl-pentapeptide-transferase [Legionella pneumophila subsp. pneumophila str. Philadelphia 1]	phospho-N-acetylmuramoyl-pentapeptide transferase [Legionella drancourtii]	phospho-N-acetylmuramoyl-pentapeptide transferase [Legionella anisa]	phospho-N-acetylmuramoyl-pentapeptide transferase [Legionella cherrii]	phospho-N-acetylmuramoyl-pentapeptide transferase [Legionella moravica]	phospho-N-acetylmuramoyl-pentapeptide transferase [Legionella longbeachae]	phospho-N-acetylmuramoyl-pentapeptide transferase [Legionella sainthelensi]
WP_025385010.1	lpari_00178	WP_028386072.1	WP_035886876.1	WP_028388179.1	WP_028372604.1	WP_018578463.1	WP_031563570.1	YP_096621.1	WP_006872390.1	WP_019233512.1	WP_028380953.1	WP_028383176.1	WP_003635189.1	WP_027269616.1	UDP-N-acetylmuramoylalanine--D-glutamate ligase [Legionella oakridgensis]	UDP-N-acetylmuramoylalanine--D-glutamate ligase	UDP-N-acetylmuramoylalanine--D-glutamate ligase [Legionella geestiana]	UDP-N-acetylmuramoylalanine--D-glutamate ligase [Legionella norrlandica]	UDP-N-acetylmuramoylalanine--D-glutamate ligase [Legionella fairfieldensis]	UDP-N-acetylmuramoylalanine--D-glutamate ligase [Legionella lansingensis]	UDP-N-acetylmuramoylalanine--D-glutamate ligase [Legionella shakespearei]	UDP-N-acetylmuramoylalanine--D-glutamate ligase [Legionella wadsworthii]	UDP-N-acetylmuramoyl-L-alanyl-D-glutamate synthetase [Legionella pneumophila subsp. pneumophila str. Philadelphia 1]	UDP-N-acetylmuramoylalanine--D-glutamate ligase [Legionella drancourtii]	UDP-N-acetylmuramoylalanine--D-glutamate ligase [Legionella anisa]	UDP-N-acetylmuramoylalanine--D-glutamate ligase [Legionella cherrii]	UDP-N-acetylmuramoylalanine--D-glutamate ligase [Legionella moravica]	UDP-N-acetylmuramoylalanine--D-glutamate ligase [Legionella longbeachae]	UDP-N-acetylmuramoylalanine--D-glutamate ligase [Legionella sainthelensi]
WP_025385011.1	lpari_00180	WP_028386070.1	WP_035886878.1	WP_028388177.1	WP_028372602.1	WP_018578465.1	WP_031563574.1	YP_096619.1	WP_040536223.1	WP_019233514.1	WP_028380955.1	WP_028383178.1	WP_012979360.1	WP_027269618.1	UDP-N-acetylmuramate--alanine ligase [Legionella oakridgensis]	UDP-N-acetylmuramate--L-alanine ligase	UDP-N-acetylmuramate--alanine ligase [Legionella geestiana]	UDP-N-acetylmuramate--alanine ligase [Legionella norrlandica]	UDP-N-acetylmuramate--alanine ligase [Legionella fairfieldensis]	UDP-N-acetylmuramate--alanine ligase [Legionella lansingensis]	UDP-N-acetylmuramate--alanine ligase [Legionella shakespearei]	UDP-N-acetylmuramate--alanine ligase [Legionella wadsworthii]	UDP-N-acetylmuramate--L-alanine ligase [Legionella pneumophila subsp. pneumophila str. Philadelphia 1]	UDP-N-acetylmuramate--alanine ligase [Legionella drancourtii]	UDP-N-acetylmuramate--alanine ligase [Legionella anisa]	UDP-N-acetylmuramate--alanine ligase [Legionella cherrii]	UDP-N-acetylmuramate--alanine ligase [Legionella moravica]	UDP-N-acetylmuramate--alanine ligase [Legionella longbeachae]	UDP-N-acetylmuramate--alanine ligase [Legionella sainthelensi]
WP_025385013.1	lpari_00184	WP_028386066.1	WP_035886881.1	WP_028388173.1	WP_028372598.1	WP_018578468.1	WP_031563583.1	YP_096615.1	WP_006872396.1	WP_019233518.1	WP_028380959.1	WP_028383181.1	WP_003635200.1	WP_027269622.1	cell division protein FtsA [Legionella oakridgensis]	Cell division protein FtsA	cell division protein FtsA [Legionella geestiana]	cell division protein FtsA [Legionella norrlandica]	cell division protein FtsA [Legionella fairfieldensis]	cell division protein FtsA [Legionella lansingensis]	cell division protein FtsA [Legionella shakespearei]	cell division protein FtsA [Legionella wadsworthii]	ATP-binding cell division protein FtsA [Legionella pneumophila subsp. pneumophila str. Philadelphia 1]	cell division protein FtsA [Legionella drancourtii]	cell division protein FtsA [Legionella anisa]	cell division protein FtsA [Legionella cherrii]	cell division protein FtsA [Legionella moravica]	cell division protein FtsA [Legionella longbeachae]	cell division protein FtsA [Legionella sainthelensi]
WP_025385014.1	lpari_00185	WP_028386065.1	WP_035886882.1	WP_028388172.1	WP_028372597.1	WP_018578469.1	WP_031563585.1	YP_096614.1	WP_006872397.1	WP_019233519.1	WP_028380960.1	WP_028383182.1	WP_003635202.1	WP_027269623.1	cell division protein FtsZ [Legionella oakridgensis]	Cell division protein FtsZ	cell division protein FtsZ [Legionella geestiana]	cell division protein FtsZ [Legionella norrlandica]	cell division protein FtsZ [Legionella fairfieldensis]	cell division protein FtsZ [Legionella lansingensis]	peptidase M23 [Legionella shakespearei]	cell division protein FtsZ [Legionella wadsworthii]	cell division protein FtsZ [Legionella pneumophila subsp. pneumophila str. Philadelphia 1]	peptidase M23 [Legionella drancourtii]	peptidase M23 [Legionella anisa]	cell division protein FtsZ [Legionella cherrii]	cell division protein FtsZ [Legionella moravica]	peptidase M23 [Legionella longbeachae]	cell division protein FtsZ [Legionella sainthelensi]
WP_025385016.1	lpari_00189	WP_028386863.1	WP_035886888.1	WP_028388170.1	WP_051546093.1	WP_018578497.1	WP_031563593.1	YP_096607.1	WP_040536234.1	WP_019233523.1	WP_028380964.1	WP_028383188.1	WP_003635214.1	WP_027269628.1	hypothetical protein [Legionella oakridgensis]	hypothetical protein	hypothetical protein [Legionella geestiana]	hypothetical protein [Legionella norrlandica]	hypothetical protein [Legionella fairfieldensis]	hypothetical protein [Legionella lansingensis]	hypothetical protein [Legionella shakespearei]	hypothetical protein [Legionella wadsworthii]	hypothetical protein lpg2602 [Legionella pneumophila subsp. pneumophila str. Philadelphia 1]	hypothetical protein [Legionella drancourtii]	hypothetical protein [Legionella anisa]	hypothetical protein [Legionella cherrii]	hypothetical protein [Legionella moravica]	hypothetical protein [Legionella longbeachae]	hypothetical protein [Legionella sainthelensi]
WP_025385017.1	lpari_00190	WP_028386862.1	WP_035886890.1	WP_028388169.1	WP_028372593.1	WP_018578498.1	WP_031563596.1	YP_096606.1	WP_006872402.1	WP_019233524.1	WP_028380965.1	WP_028383189.1	WP_003635217.1	WP_027269629.1	membrane protein [Legionella oakridgensis]	hypothetical protein	membrane protein [Legionella geestiana]	membrane protein [Legionella norrlandica]	membrane protein [Legionella fairfieldensis]	membrane protein [Legionella lansingensis]	membrane protein [Legionella shakespearei]	membrane protein [Legionella wadsworthii]	hypothetical protein lpg2601 [Legionella pneumophila subsp. pneumophila str. Philadelphia 1]	membrane protein [Legionella drancourtii]	membrane protein [Legionella anisa]	membrane protein [Legionella cherrii]	membrane protein [Legionella moravica]	membrane protein [Legionella longbeachae]	membrane protein [Legionella sainthelensi]
WP_025385021.1	lpari_01502	WP_028387457.1	WP_035891329.1	WP_028387937.1	WP_028373735.1	WP_018577837.1	WP_031564908.1	YP_096275.1	WP_006869235.1	WP_019235028.1	WP_028380071.1	WP_028383930.1	WP_003636629.1	WP_027271202.1	cytochrome C biogenesis protein [Legionella oakridgensis]	Curved DNA-binding protein	cytochrome C biogenesis protein [Legionella geestiana]	cytochrome C biogenesis protein, partial [Legionella norrlandica]	cytochrome C biogenesis protein [Legionella fairfieldensis]	cytochrome C biogenesis protein [Legionella lansingensis]	cytochrome C biogenesis protein [Legionella shakespearei]	cytochrome C biogenesis protein [Legionella wadsworthii]	curved DNA binding protein DnaJ [Legionella pneumophila subsp. pneumophila str. Philadelphia 1]	cytochrome C biogenesis protein [Legionella drancourtii]	cytochrome C biogenesis protein [Legionella anisa]	cytochrome C biogenesis protein [Legionella cherrii]	cytochrome C biogenesis protein [Legionella moravica]	cytochrome C biogenesis protein [Legionella longbeachae]	cytochrome C biogenesis protein [Legionella sainthelensi]
WP_025385022.1	lpari_01503	WP_035904157.1	WP_035891333.1	WP_028387938.1	WP_051546202.1	WP_018577838.1	WP_031564906.1	YP_096276.1	WP_006869234.1	WP_019235027.1	WP_028380070.1	WP_028383929.1	WP_003636627.1	WP_027271201.1	hypothetical protein [Legionella oakridgensis]	Chaperone modulatory protein CbpM	hypothetical protein [Legionella geestiana]	molecular chaperone [Legionella norrlandica]	hypothetical protein [Legionella fairfieldensis]	hypothetical protein [Legionella lansingensis]	molecular chaperone [Legionella shakespearei]	molecular chaperone [Legionella wadsworthii]	hypothetical protein lpg2264 [Legionella pneumophila subsp. pneumophila str. Philadelphia 1]	molecular chaperone [Legionella drancourtii]	molecular chaperone [Legionella anisa]	molecular chaperone [Legionella cherrii]	molecular chaperone [Legionella moravica]	molecular chaperone [Legionella longbeachae]	molecular chaperone [Legionella sainthelensi]
WP_025385024.1	lpari_01301	WP_028387462.1	WP_035886912.1	WP_028388161.1	WP_028372581.1	WP_018578511.1	WP_031564281.1	YP_096595.1	WP_006871317.1	WP_019232951.1	WP_028379751.1	WP_028383199.1	WP_003635526.1	WP_027272274.1	chromosome partitioning protein ParB [Legionella oakridgensis]	putative chromosome-partitioning protein ParB	chromosome partitioning protein ParB [Legionella geestiana]	chromosome partitioning protein ParB [Legionella norrlandica]	chromosome partitioning protein ParB [Legionella fairfieldensis]	chromosome partitioning protein ParB [Legionella lansingensis]	chromosome partitioning protein ParB [Legionella shakespearei]	chromosome partitioning protein ParB [Legionella wadsworthii]	chromosome partitioning protein ParB [Legionella pneumophila subsp. pneumophila str. Philadelphia 1]	chromosome partitioning protein ParB [Legionella drancourtii]	chromosome partitioning protein ParB [Legionella anisa]	chromosome partitioning protein ParB [Legionella cherrii]	chromosome partitioning protein ParB [Legionella moravica]	chromosome partitioning protein ParB [Legionella longbeachae]	chromosome partitioning protein ParB [Legionella sainthelensi]
WP_025385026.1	lpari_00819	WP_051551081.1	WP_035886909.1	WP_035918096.1	WP_028372584.1	WP_018578505.1	WP_031563830.1	YP_096598.1	WP_040534870.1	WP_019234823.1	WP_028381141.1	WP_028383197.1	WP_003632882.1	WP_035905967.1	16S rRNA methyltransferase [Legionella oakridgensis]	Ribosomal RNA small subunit methyltransferase B	hypothetical protein [Legionella geestiana]	16S rRNA methyltransferase [Legionella norrlandica]	16S rRNA methyltransferase [Legionella fairfieldensis]	16S rRNA methyltransferase [Legionella lansingensis]	hypothetical protein [Legionella shakespearei]	16S rRNA methyltransferase [Legionella wadsworthii]	rRNA methyltransferase (SUN protein) [Legionella pneumophila subsp. pneumophila str. Philadelphia 1]	16S rRNA methyltransferase [Legionella drancourtii]	16S rRNA methyltransferase [Legionella anisa]	16S rRNA methyltransferase [Legionella cherrii]	16S rRNA methyltransferase [Legionella moravica]	16S rRNA methyltransferase [Legionella longbeachae]	16S rRNA methyltransferase [Legionella sainthelensi]
WP_025385027.1	lpari_00820	WP_028387464.1	WP_035886907.1	WP_028388164.1	WP_028372585.1	WP_018578504.1	WP_031563831.1	YP_096599.1	WP_006870705.1	WP_019234824.1	WP_028381140.1	WP_028383196.1	WP_003632881.1	WP_027270819.1	methionyl-tRNA formyltransferase [Legionella oakridgensis]	Methionyl-tRNA formyltransferase	methionyl-tRNA formyltransferase [Legionella geestiana]	methionyl-tRNA formyltransferase [Legionella norrlandica]	methionyl-tRNA formyltransferase [Legionella fairfieldensis]	methionyl-tRNA formyltransferase [Legionella lansingensis]	methionyl-tRNA formyltransferase [Legionella shakespearei]	methionyl-tRNA formyltransferase [Legionella wadsworthii]	methionyl tRNA formyltransferase [Legionella pneumophila subsp. pneumophila str. Philadelphia 1]	methionyl-tRNA formyltransferase [Legionella drancourtii]	methionyl-tRNA formyltransferase [Legionella anisa]	methionyl-tRNA formyltransferase [Legionella cherrii]	methionyl-tRNA formyltransferase [Legionella moravica]	methionyl-tRNA formyltransferase [Legionella longbeachae]	methionyl-tRNA formyltransferase [Legionella sainthelensi]
WP_025385028.1	lpari_00821	WP_028387465.1	WP_035886905.1	WP_028388165.1	WP_028372586.1	WP_026254047.1	WP_031563832.1	YP_096600.1	WP_006870706.1	WP_019234825.1	WP_028381139.1	WP_028383195.1	WP_003632880.1	WP_027270820.1	peptide deformylase [Legionella oakridgensis]	Peptide deformylase	peptide deformylase [Legionella geestiana]	peptide deformylase [Legionella norrlandica]	peptide deformylase [Legionella fairfieldensis]	peptide deformylase [Legionella lansingensis]	peptide deformylase [Legionella shakespearei]	peptide deformylase [Legionella wadsworthii]	peptide deformylase [Legionella pneumophila subsp. pneumophila str. Philadelphia 1]	peptide deformylase [Legionella drancourtii]	peptide deformylase [Legionella anisa]	peptide deformylase [Legionella cherrii]	peptide deformylase [Legionella moravica]	peptide deformylase [Legionella longbeachae]	peptide deformylase [Legionella sainthelensi]
WP_025385030.1	lpari_00823	WP_028387466.1	WP_035886902.1	WP_028388166.1	WP_028372587.1	WP_018578501.1	WP_031563834.1	YP_096602.1	WP_006870708.1	WP_019234827.1	WP_028381137.1	WP_028383193.1	WP_003632878.1	WP_051544725.1	DNA-binding protein [Legionella oakridgensis]	hypothetical protein	DNA-binding protein [Legionella geestiana]	DNA-binding protein [Legionella norrlandica]	DNA-binding protein [Legionella fairfieldensis]	DNA-binding protein [Legionella lansingensis]	DNA processing protein DprA [Legionella shakespearei]	DNA-binding protein [Legionella wadsworthii]	DNA processing protein DprA [Legionella pneumophila subsp. pneumophila str. Philadelphia 1]	DNA processing protein DprA [Legionella drancourtii]	DNA processing protein DprA [Legionella anisa]	DNA-binding protein [Legionella cherrii]	DNA-binding protein [Legionella moravica]	DNA processing protein DprA [Legionella longbeachae]	DNA-binding protein [Legionella sainthelensi]
WP_025385031.1	lpari_00824	WP_028387467.1	WP_035886896.1	WP_028388167.1	WP_028372588.1	WP_018578500.1	WP_031563835.1	YP_096603.1	WP_006870709.1	WP_019234828.1	WP_028381136.1	WP_028383192.1	WP_003632877.1	WP_027270823.1	hypothetical protein [Legionella oakridgensis]	Protein Smg	hypothetical protein [Legionella geestiana]	hypothetical protein [Legionella norrlandica]	hypothetical protein [Legionella fairfieldensis]	hypothetical protein [Legionella lansingensis]	hypothetical protein [Legionella shakespearei]	hypothetical protein [Legionella wadsworthii]	hypothetical protein lpg2598 [Legionella pneumophila subsp. pneumophila str. Philadelphia 1]	hypothetical protein [Legionella drancourtii]	hypothetical protein [Legionella anisa]	hypothetical protein [Legionella cherrii]	hypothetical protein [Legionella moravica]	hypothetical protein [Legionella longbeachae]	hypothetical protein [Legionella sainthelensi]
WP_025385032.1	lpari_00825	WP_028387468.1	WP_035886894.1	WP_028388168.1	WP_028372589.1	WP_018578499.1	WP_031563836.1	YP_096604.1	WP_006870710.1	WP_019234829.1	WP_028381135.1	WP_028383191.1	WP_003632876.1	WP_027270824.1	DNA topoisomerase I [Legionella oakridgensis]	DNA topoisomerase 1	DNA topoisomerase I [Legionella geestiana]	DNA topoisomerase I [Legionella norrlandica]	DNA topoisomerase I [Legionella fairfieldensis]	DNA topoisomerase I [Legionella lansingensis]	DNA topoisomerase I [Legionella shakespearei]	DNA topoisomerase I [Legionella wadsworthii]	DNA topoisomerase I [Legionella pneumophila subsp. pneumophila str. Philadelphia 1]	DNA topoisomerase I [Legionella drancourtii]	DNA topoisomerase I [Legionella anisa]	DNA topoisomerase I [Legionella cherrii]	DNA topoisomerase I [Legionella moravica]	DNA topoisomerase I [Legionella longbeachae]	DNA topoisomerase I [Legionella sainthelensi]
WP_025385038.1	lpari_00827	WP_028387452.1	WP_035886932.1	WP_028388155.1	WP_028372575.1	WP_018578519.1	WP_031563838.1	YP_096586.1	WP_006870714.1	WP_019234832.1	WP_028381133.1	WP_028383205.1	WP_003632874.1	WP_027270828.1	MFS transporter [Legionella oakridgensis]	Pyruvate dehydrogenase E1 component subunit beta	MFS transporter [Legionella geestiana]	MFS transporter [Legionella norrlandica]	MFS transporter [Legionella fairfieldensis]	MFS transporter [Legionella lansingensis]	MFS transporter [Legionella shakespearei]	MFS transporter [Legionella wadsworthii]	2-oxoisovalerate dehydrogenase E1 [Legionella pneumophila subsp. pneumophila str. Philadelphia 1]	MFS transporter [Legionella drancourtii]	MFS transporter [Legionella anisa]	MFS transporter [Legionella cherrii]	MFS transporter [Legionella moravica]	MFS transporter [Legionella longbeachae]	MFS transporter [Legionella sainthelensi]
WP_025385039.1	lpari_00828	WP_028387451.1	WP_035886933.1	WP_028388154.1	WP_028372574.1	WP_026254048.1	WP_031563839.1	YP_096585.1	WP_006870715.1	WP_019234833.1	WP_028381132.1	WP_028383206.1	WP_003632872.1	WP_027270829.1	acyl-CoA dehydrogenase [Legionella oakridgensis]	Acyl-CoA dehydrogenase	acyl-CoA dehydrogenase [Legionella geestiana]	acyl-CoA dehydrogenase [Legionella norrlandica]	acyl-CoA dehydrogenase [Legionella fairfieldensis]	acyl-CoA dehydrogenase [Legionella lansingensis]	acyl-CoA dehydrogenase [Legionella shakespearei]	acyl-CoA dehydrogenase [Legionella wadsworthii]	glutaryl CoA dehydrogenase [Legionella pneumophila subsp. pneumophila str. Philadelphia 1]	acyl-CoA dehydrogenase [Legionella drancourtii]	acyl-CoA dehydrogenase [Legionella anisa]	acyl-CoA dehydrogenase [Legionella cherrii]	acyl-CoA dehydrogenase [Legionella moravica]	acyl-CoA dehydrogenase [Legionella longbeachae]	acyl-CoA dehydrogenase [Legionella sainthelensi]
WP_025385052.1	lpari_03014	WP_028385680.1	WP_035887926.1	WP_028389396.1	WP_035916243.1	WP_026253887.1	WP_031566714.1	YP_096971.1	WP_006870123.1	WP_019232647.1	WP_028381476.1	WP_028382908.1	WP_003633948.1	WP_027270454.1	hypothetical protein [Legionella oakridgensis]	Pyrroline-5-carboxylate reductase	hypothetical protein [Legionella geestiana]	hypothetical protein [Legionella norrlandica]	hypothetical protein [Legionella fairfieldensis]	hypothetical protein [Legionella lansingensis]	hypothetical protein [Legionella shakespearei]	hypothetical protein [Legionella wadsworthii]	hypothetical protein lpg2979 [Legionella pneumophila subsp. pneumophila str. Philadelphia 1]	hypothetical protein [Legionella drancourtii]	hypothetical protein [Legionella anisa]	hypothetical protein [Legionella cherrii]	hypothetical protein [Legionella moravica]	hypothetical protein [Legionella longbeachae]	hypothetical protein [Legionella sainthelensi]
WP_025385108.1	lpari_03142	WP_051550964.1	WP_035889073.1	WP_051555226.1	WP_035916247.1	WP_018577241.1	WP_035898913.1	YP_096492.1	WP_006871981.1	WP_019234497.1	WP_028380818.1	WP_028383758.1	WP_003634682.1	WP_027271303.1	methyltransferase [Legionella oakridgensis]	TPR repeat-containing protein YrrB	hypothetical protein [Legionella geestiana]	methyltransferase [Legionella norrlandica]	methyltransferase [Legionella fairfieldensis]	methyltransferase [Legionella lansingensis]	hypothetical protein [Legionella shakespearei]	methyltransferase [Legionella wadsworthii]	hypothetical protein lpg2485 [Legionella pneumophila subsp. pneumophila str. Philadelphia 1]	methyltransferase [Legionella drancourtii]	methyltransferase [Legionella anisa]	methyltransferase [Legionella cherrii]	methyltransferase [Legionella moravica]	methyltransferase [Legionella longbeachae]	methyltransferase [Legionella sainthelensi]
WP_025385149.1	lpari_00683	WP_035902195.1	WP_035889815.1	WP_028388629.1	WP_028372112.1	WP_018576463.1	WP_031562646.1	YP_096370.1	WP_006870542.1	WP_019234718.1	WP_028381234.1	WP_028384341.1	WP_003634983.1	WP_027269529.1	DNA-directed RNA polymerase sigma-70 factor [Legionella oakridgensis]	RNA polymerase sigma factor RpoD	DNA-directed RNA polymerase sigma-70 factor [Legionella geestiana]	DNA-directed RNA polymerase sigma-70 factor [Legionella norrlandica]	DNA-directed RNA polymerase sigma-70 factor [Legionella fairfieldensis]	DNA-directed RNA polymerase sigma-70 factor [Legionella lansingensis]	RNA polymerase sigma factor RpoD [Legionella shakespearei]	DNA-directed RNA polymerase sigma-70 factor [Legionella wadsworthii]	RNA polymerase sigma 70 factor (RpoD) [Legionella pneumophila subsp. pneumophila str. Philadelphia 1]	RNA polymerase sigma factor RpoD [Legionella drancourtii]	RNA polymerase sigma factor RpoD [Legionella anisa]	DNA-directed RNA polymerase sigma-70 factor [Legionella cherrii]	DNA-directed RNA polymerase sigma-70 factor [Legionella moravica]	RNA polymerase sigma factor RpoD [Legionella longbeachae]	DNA-directed RNA polymerase sigma-70 factor [Legionella sainthelensi]
WP_025385150.1	lpari_00686	WP_028386433.1	WP_035889814.1	WP_028388627.1	WP_028372114.1	WP_018576466.1	WP_031562640.1	YP_096368.1	WP_006870544.1	WP_019234721.1	WP_028381232.1	WP_028384339.1	WP_012979385.1	WP_027269531.1	glutamyl-tRNA amidotransferase [Legionella oakridgensis]	hypothetical protein	glutamyl-tRNA amidotransferase [Legionella geestiana]	glutamyl-tRNA amidotransferase [Legionella norrlandica]	glutamyl-tRNA amidotransferase [Legionella fairfieldensis]	glutamyl-tRNA amidotransferase [Legionella lansingensis]	aspartyl-tRNA amidotransferase subunit B [Legionella shakespearei]	glutamyl-tRNA amidotransferase [Legionella wadsworthii]	hypothetical protein lpg2359 [Legionella pneumophila subsp. pneumophila str. Philadelphia 1]	aspartyl-tRNA amidotransferase subunit B [Legionella drancourtii]	aspartyl-tRNA amidotransferase subunit B [Legionella anisa]	glutamyl-tRNA amidotransferase [Legionella cherrii]	glutamyl-tRNA amidotransferase [Legionella moravica]	aspartyl-tRNA amidotransferase subunit B [Legionella longbeachae]	glutamyl-tRNA amidotransferase [Legionella sainthelensi]
WP_025385152.1	lpari_00688	WP_028386435.1	WP_035889810.1	WP_028388625.1	WP_028372116.1	WP_018576468.1	WP_031562635.1	YP_096366.1	WP_006870546.1	WP_019234722.1	WP_028381231.1	WP_028384338.1	WP_003634992.1	WP_027269532.1	tRNA threonylcarbamoyladenosine modification protein TsaD [Legionella oakridgensis]	tRNA N6-adenosine threonylcarbamoyltransferase	tRNA threonylcarbamoyladenosine modification protein TsaD [Legionella geestiana]	tRNA threonylcarbamoyladenosine modification protein TsaD [Legionella norrlandica]	tRNA threonylcarbamoyladenosine modification protein TsaD [Legionella fairfieldensis]	tRNA threonylcarbamoyladenosine modification protein TsaD [Legionella lansingensis]	tRNA threonylcarbamoyladenosine modification protein TsaD [Legionella shakespearei]	tRNA threonylcarbamoyladenosine modification protein TsaD [Legionella wadsworthii]	DNA-binding/iron metalloprotein/AP endonuclease [Legionella pneumophila subsp. pneumophila str. Philadelphia 1]	tRNA threonylcarbamoyladenosine modification protein TsaD [Legionella drancourtii]	tRNA threonylcarbamoyladenosine modification protein TsaD [Legionella anisa]	tRNA threonylcarbamoyladenosine modification protein TsaD [Legionella cherrii]	tRNA threonylcarbamoyladenosine modification protein TsaD [Legionella moravica]	tRNA threonylcarbamoyladenosine modification protein TsaD [Legionella longbeachae]	tRNA threonylcarbamoyladenosine modification protein TsaD [Legionella sainthelensi]
WP_025385154.1	lpari_00690	WP_028386436.1	WP_035889807.1	WP_028388624.1	WP_028372117.1	WP_018576470.1	WP_031562631.1	YP_096363.1	WP_040534900.1	WP_019234724.1	WP_028381228.1	WP_028384336.1	WP_012979384.1	WP_027269534.1	radical SAM protein [Legionella oakridgensis]	Oxygen-independent coproporphyrinogen-III oxidase-like protein YqeR	radical SAM protein [Legionella geestiana]	radical SAM protein [Legionella norrlandica]	radical SAM protein [Legionella fairfieldensis]	radical SAM protein [Legionella lansingensis]	HemN family oxidoreductase [Legionella shakespearei]	radical SAM protein [Legionella wadsworthii]	(oxygen-independent) coproporphyrinogen III oxidase [Legionella pneumophila subsp. pneumophila str. Philadelphia 1]	radical SAM protein [Legionella drancourtii]	HemN family oxidoreductase [Legionella anisa]	radical SAM protein [Legionella cherrii]	radical SAM protein [Legionella moravica]	HemN family oxidoreductase [Legionella longbeachae]	radical SAM protein [Legionella sainthelensi]
WP_025385155.1	lpari_00691	WP_028386438.1	WP_035889800.1	WP_028388622.1	WP_028372119.1	WP_018576472.1	WP_031562628.1	YP_096361.1	WP_006870549.1	WP_019234725.1	WP_028381227.1	WP_028384334.1	WP_003634998.1	WP_027269535.1	malate dehydrogenase [Legionella oakridgensis]	Malate dehydrogenase	malate dehydrogenase [Legionella geestiana]	malate dehydrogenase [Legionella norrlandica]	malate dehydrogenase [Legionella fairfieldensis]	malate dehydrogenase [Legionella lansingensis]	malate dehydrogenase [Legionella shakespearei]	malate dehydrogenase [Legionella wadsworthii]	malate dehydrogenase [Legionella pneumophila subsp. pneumophila str. Philadelphia 1]	malate dehydrogenase [Legionella drancourtii]	malate dehydrogenase [Legionella anisa]	malate dehydrogenase [Legionella cherrii]	malate dehydrogenase [Legionella moravica]	malate dehydrogenase [Legionella longbeachae]	malate dehydrogenase [Legionella sainthelensi]
WP_025385157.1	lpari_00216	WP_028386845.1	WP_035890764.1	WP_028388614.1	WP_028372133.1	WP_018576797.1	WP_031563647.1	YP_094508.1	WP_006872425.1	WP_019233551.1	WP_028380991.1	WP_028383669.1	WP_003635263.1	WP_027269650.1	3-dehydroquinate dehydratase [Legionella oakridgensis]	3-dehydroquinate dehydratase 1	3-dehydroquinate dehydratase [Legionella geestiana]	3-dehydroquinate dehydratase [Legionella norrlandica]	3-dehydroquinate dehydratase [Legionella fairfieldensis]	3-dehydroquinate dehydratase [Legionella lansingensis]	3-dehydroquinate dehydratase [Legionella shakespearei]	3-dehydroquinate dehydratase [Legionella wadsworthii]	3-dehydroquinate dehydratase [Legionella pneumophila subsp. pneumophila str. Philadelphia 1]	3-dehydroquinate dehydratase [Legionella drancourtii]	3-dehydroquinate dehydratase [Legionella anisa]	3-dehydroquinate dehydratase [Legionella cherrii]	3-dehydroquinate dehydratase [Legionella moravica]	3-dehydroquinate dehydratase [Legionella longbeachae]	3-dehydroquinate dehydratase [Legionella sainthelensi]
WP_025385161.1	lpari_00221	WP_051550970.1	WP_035890760.1	WP_028388609.1	WP_028372141.1	WP_018576802.1	WP_031563655.1	YP_094513.1	WP_040536239.1	WP_019233555.1	WP_028380995.1	WP_028383673.1	WP_003635272.1	WP_027269654.1	hypothetical protein [Legionella oakridgensis]	hypothetical protein	hypothetical protein [Legionella geestiana]	hypothetical protein [Legionella norrlandica]	hypothetical protein [Legionella fairfieldensis]	hypothetical protein [Legionella lansingensis]	endonuclease/exonuclease/phosphatase [Legionella shakespearei]	hypothetical protein [Legionella wadsworthii]	hypothetical protein lpg0469 [Legionella pneumophila subsp. pneumophila str. Philadelphia 1]	hypothetical protein [Legionella drancourtii]	endonuclease/exonuclease/phosphatase [Legionella anisa]	hypothetical protein [Legionella cherrii]	hypothetical protein [Legionella moravica]	endonuclease/exonuclease/phosphatase [Legionella longbeachae]	hypothetical protein [Legionella sainthelensi]
WP_025385162.1	lpari_00222	WP_028386848.1	WP_035890759.1	WP_028388608.1	WP_028372142.1	WP_018576803.1	WP_031563658.1	YP_094514.1	WP_006872430.1	WP_019233556.1	WP_028380997.1	WP_028383674.1	WP_003635278.1	WP_027269655.1	fructose-bisphosphate aldolase [Legionella oakridgensis]	Fructose-bisphosphate aldolase class 1	fructose-bisphosphate aldolase [Legionella geestiana]	fructose-bisphosphate aldolase [Legionella norrlandica]	fructose-bisphosphate aldolase [Legionella fairfieldensis]	fructose-bisphosphate aldolase [Legionella lansingensis]	fructose-bisphosphate aldolase [Legionella shakespearei]	fructose-bisphosphate aldolase [Legionella wadsworthii]	fructose bisphosphate aldolase [Legionella pneumophila subsp. pneumophila str. Philadelphia 1]	fructose-bisphosphate aldolase [Legionella drancourtii]	fructose-bisphosphate aldolase [Legionella anisa]	fructose-bisphosphate aldolase [Legionella cherrii]	fructose-bisphosphate aldolase [Legionella moravica]	fructose-bisphosphate aldolase [Legionella longbeachae]	fructose-bisphosphate aldolase [Legionella sainthelensi]
WP_025385163.1	lpari_00223	WP_028386849.1	WP_035890771.1	WP_028388607.1	WP_028372143.1	WP_018576804.1	WP_031563660.1	YP_094515.1	WP_006872431.1	WP_040522506.1	WP_028380998.1	WP_028383675.1	WP_003635281.1	WP_027269656.1	phenol hydroxylase [Legionella oakridgensis]	Ferredoxin--NADP reductase	phenol hydroxylase [Legionella geestiana]	phenol hydroxylase [Legionella norrlandica]	phenol hydroxylase [Legionella fairfieldensis]	phenol hydroxylase [Legionella lansingensis]	phenol hydroxylase [Legionella shakespearei]	phenol hydroxylase [Legionella wadsworthii]	phenol hydroxylase [Legionella pneumophila subsp. pneumophila str. Philadelphia 1]	phenol hydroxylase [Legionella drancourtii]	phenol hydroxylase [Legionella anisa]	phenol hydroxylase [Legionella cherrii]	phenol hydroxylase [Legionella moravica]	phenol hydroxylase [Legionella longbeachae]	phenol hydroxylase [Legionella sainthelensi]
WP_025385167.1	lpari_00226	WP_028387488.1	WP_035890756.1	WP_028388604.1	WP_028372146.1	WP_026253899.1	WP_031563667.1	YP_094518.1	WP_006872435.1	WP_019233560.1	WP_028381001.1	WP_028383678.1	WP_003635288.1	WP_027269658.1	CDP-diacylglycerol--serine O-phosphatidyltransferase [Legionella oakridgensis]	hypothetical protein	CDP-diacylglycerol--serine O-phosphatidyltransferase [Legionella geestiana]	CDP-diacylglycerol--serine O-phosphatidyltransferase [Legionella norrlandica]	CDP-diacylglycerol--serine O-phosphatidyltransferase [Legionella fairfieldensis]	CDP-diacylglycerol--serine O-phosphatidyltransferase [Legionella lansingensis]	CDP-diacylglycerol--serine O-phosphatidyltransferase [Legionella shakespearei]	CDP-diacylglycerol--serine O-phosphatidyltransferase [Legionella wadsworthii]	CDP-diacylglycerol--serine O-phosphatidyltransferase [Legionella pneumophila subsp. pneumophila str. Philadelphia 1]	CDP-diacylglycerol--serine O-phosphatidyltransferase [Legionella drancourtii]	CDP-diacylglycerol--serine O-phosphatidyltransferase [Legionella anisa]	CDP-diacylglycerol--serine O-phosphatidyltransferase [Legionella cherrii]	CDP-diacylglycerol--serine O-phosphatidyltransferase [Legionella moravica]	CDP-diacylglycerol--serine O-phosphatidyltransferase [Legionella longbeachae]	CDP-diacylglycerol--serine O-phosphatidyltransferase [Legionella sainthelensi]
WP_025385170.1	lpari_00230	WP_028387479.1	WP_035889915.1	WP_028388602.1	WP_028372155.1	WP_018576809.1	WP_031563668.1	YP_094520.1	WP_006872448.1	WP_019233562.1	WP_028381003.1	WP_028383680.1	WP_003635292.1	WP_027269660.1	ribosome hibernation promoting factor HPF [Legionella oakridgensis]	Ribosome hibernation promoting factor	ribosome hibernation promoting factor HPF [Legionella geestiana]	ribosome hibernation promoting factor HPF [Legionella norrlandica]	ribosome hibernation promoting factor HPF [Legionella fairfieldensis]	ribosome hibernation promoting factor HPF [Legionella lansingensis]	ribosome hibernation promoting factor HPF [Legionella shakespearei]	ribosome hibernation promoting factor HPF [Legionella wadsworthii]	sigma-54 modulation protein [Legionella pneumophila subsp. pneumophila str. Philadelphia 1]	ribosome hibernation promoting factor HPF [Legionella drancourtii]	ribosome hibernation promoting factor HPF [Legionella anisa]	ribosome hibernation promoting factor HPF [Legionella cherrii]	ribosome hibernation promoting factor HPF [Legionella moravica]	ribosome hibernation promoting factor HPF [Legionella longbeachae]	ribosome hibernation promoting factor HPF [Legionella sainthelensi]
WP_025385174.1	lpari_00234	WP_028387474.1	WP_035889924.1	WP_028388598.1	WP_028372159.1	WP_018576812.1	WP_031563671.1	YP_094525.1	WP_040536255.1	WP_019233565.1	WP_028381006.1	WP_028383683.1	WP_003635331.1	WP_027269662.1	tRNA (guanine-N7)-methyltransferase [Legionella oakridgensis]	tRNA (guanine-N(7)-)-methyltransferase	tRNA (guanine-N7)-methyltransferase [Legionella geestiana]	tRNA (guanine-N7)-methyltransferase [Legionella norrlandica]	tRNA (guanine-N7)-methyltransferase [Legionella fairfieldensis]	tRNA (guanine-N7)-methyltransferase [Legionella lansingensis]	tRNA (guanine-N(7)-)-methyltransferase [Legionella shakespearei]	tRNA (guanine-N7)-methyltransferase [Legionella wadsworthii]	tRNA (guanine-N(7)-)-methyltransferase [Legionella pneumophila subsp. pneumophila str. Philadelphia 1]	tRNA (guanine-N7)-methyltransferase [Legionella drancourtii]	tRNA (guanine-N(7)-)-methyltransferase [Legionella anisa]	tRNA (guanine-N7)-methyltransferase [Legionella cherrii]	tRNA (guanine-N7)-methyltransferase [Legionella moravica]	tRNA (guanine-N(7)-)-methyltransferase [Legionella longbeachae]	tRNA (guanine-N7)-methyltransferase [Legionella sainthelensi]
WP_025385176.1	lpari_00239	WP_035904165.1	WP_035889928.1	WP_028388597.1	WP_028372161.1	WP_018576814.1	WP_031563678.1	YP_094528.1	WP_006872454.1	WP_019233569.1	WP_028381010.1	WP_028383686.1	WP_003635342.1	WP_027269666.1	protease [Legionella oakridgensis]	Modulator of FtsH protease HflK	protease [Legionella geestiana]	protease [Legionella norrlandica]	protease [Legionella fairfieldensis]	protease [Legionella lansingensis]	protease [Legionella shakespearei]	protease [Legionella wadsworthii]	protease subunit HflK [Legionella pneumophila subsp. pneumophila str. Philadelphia 1]	protease [Legionella drancourtii]	protease [Legionella anisa]	protease [Legionella cherrii]	protease [Legionella moravica]	protease [Legionella longbeachae]	protease [Legionella sainthelensi]
WP_025385177.1	lpari_00241	WP_028387473.1	WP_035889931.1	WP_028388596.1	WP_028372162.1	WP_018576815.1	WP_031563679.1	YP_094529.1	WP_006872455.1	WP_019233570.1	WP_028381011.1	WP_028383687.1	WP_003635344.1	WP_027269667.1	protein HflC [Legionella oakridgensis]	Modulator of FtsH protease HflC	protein HflC [Legionella geestiana]	protein HflC [Legionella norrlandica]	protein HflC [Legionella fairfieldensis]	protein HflC [Legionella lansingensis]	membrane protease HflC [Legionella shakespearei]	protein HflC [Legionella wadsworthii]	membrane protease subunit HflC [Legionella pneumophila subsp. pneumophila str. Philadelphia 1]	membrane protease HflC [Legionella drancourtii]	membrane protease HflC [Legionella anisa]	protein HflC [Legionella cherrii]	protein HflC [Legionella moravica]	membrane protease HflC [Legionella longbeachae]	protein HflC [Legionella sainthelensi]
WP_025385180.1	lpari_01202	WP_028385556.1	WP_035889778.1	WP_035918131.1	WP_028373862.1	WP_018576477.1	WP_031564530.1	YP_096357.1	WP_006871089.1	WP_019234347.1	WP_028379882.1	WP_028384330.1	WP_003635769.1	WP_027271605.1	superoxide dismutase [Legionella oakridgensis]	Superoxide dismutase [Cu-Zn] 1	superoxide dismutase [Legionella geestiana]	superoxide dismutase [Legionella norrlandica]	superoxide dismutase [Legionella fairfieldensis]	superoxide dismutase [Legionella lansingensis]	hypothetical protein [Legionella shakespearei]	superoxide dismutase [Legionella wadsworthii]	superoxide dismutase [Legionella pneumophila subsp. pneumophila str. Philadelphia 1]	superoxide dismutase [Legionella drancourtii]	superoxide dismutase [Legionella anisa]	superoxide dismutase [Legionella cherrii]	superoxide dismutase [Legionella moravica]	superoxide dismutase [Legionella longbeachae]	superoxide dismutase [Legionella sainthelensi]
WP_025385182.1	lpari_00695	WP_028386952.1	WP_035889774.1	WP_028388088.1	WP_028373865.1	WP_018576481.1	WP_031562620.1	YP_096354.1	WP_006870555.1	WP_019234730.1	WP_028381222.1	WP_028384310.1	WP_003635080.1	WP_027269563.1	RNA helicase [Legionella oakridgensis]	ATP-dependent RNA helicase DeaD	RNA helicase [Legionella geestiana]	RNA helicase [Legionella norrlandica]	RNA helicase [Legionella fairfieldensis]	RNA helicase [Legionella lansingensis]	RNA helicase [Legionella shakespearei]	RNA helicase [Legionella wadsworthii]	ATP-dependent RNA helicase [Legionella pneumophila subsp. pneumophila str. Philadelphia 1]	RNA helicase [Legionella drancourtii]	RNA helicase [Legionella anisa]	RNA helicase [Legionella cherrii]	RNA helicase [Legionella moravica]	RNA helicase [Legionella longbeachae]	RNA helicase [Legionella sainthelensi]
WP_025385183.1	lpari_00697	WP_028386953.1	WP_035889763.1	WP_028388087.1	WP_028373867.1	WP_018577174.1	WP_031562617.1	YP_096352.1	WP_006870557.1	WP_019234734.1	WP_028381220.1	WP_028384313.1	WP_003635076.1	WP_027269562.1	lysophospholipase [Legionella oakridgensis]	Phosphatidylcholine-sterol acyltransferase	hypothetical protein [Legionella geestiana]	lysophospholipase [Legionella norrlandica]	lysophospholipase [Legionella fairfieldensis]	lysophospholipase [Legionella lansingensis]	hypothetical protein [Legionella shakespearei]	lysophospholipase [Legionella wadsworthii]	lysophospholipase A [Legionella pneumophila subsp. pneumophila str. Philadelphia 1]	lysophospholipase [Legionella drancourtii]	lysophospholipase [Legionella anisa]	lysophospholipase [Legionella cherrii]	lysophospholipase [Legionella moravica]	lysophospholipase [Legionella longbeachae]	lysophospholipase [Legionella sainthelensi]
WP_025385184.1	lpari_00700	WP_028386591.1	WP_035889761.1	WP_028388085.1	WP_028373444.1	WP_018577177.1	WP_031562612.1	YP_096349.1	WP_040534796.1	WP_019234737.1	WP_028381217.1	WP_028384316.1	WP_003632979.1	WP_027270748.1	3-deoxy-D-manno-octulosonic acid transferase [Legionella oakridgensis]	3-deoxy-D-manno-octulosonic acid transferase	3-deoxy-D-manno-octulosonic acid transferase [Legionella geestiana]	3-deoxy-D-manno-octulosonic acid transferase [Legionella norrlandica]	3-deoxy-D-manno-octulosonic acid transferase [Legionella fairfieldensis]	3-deoxy-D-manno-octulosonic acid transferase [Legionella lansingensis]	hypothetical protein [Legionella shakespearei]	3-deoxy-D-manno-octulosonic acid transferase [Legionella wadsworthii]	3-deoxy-D-manno-oct-2-ulosonic acid transferase [Legionella pneumophila subsp. pneumophila str. Philadelphia 1]	3-deoxy-D-manno-octulosonic acid transferase [Legionella drancourtii]	3-deoxy-D-manno-oct-2-ulosonic acid transferase [Legionella anisa]	3-deoxy-D-manno-octulosonic acid transferase [Legionella cherrii]	3-deoxy-D-manno-octulosonic acid transferase [Legionella moravica]	3-deoxy-D-manno-oct-2-ulosonic acid transferase [Legionella longbeachae]	3-deoxy-D-manno-octulosonic acid transferase [Legionella sainthelensi]
WP_025385185.1	lpari_00701	WP_051550930.1	WP_035889757.1	WP_051555110.1	WP_028372655.1	WP_018577179.1	WP_031562609.1	YP_096347.1	WP_006870562.1	WP_019234738.1	WP_028381216.1	WP_028384317.1	WP_012978818.1	WP_027270749.1	molecular chaperone DnaK [Legionella oakridgensis]	RNA polymerase-binding transcription factor DksA	molecular chaperone DnaK [Legionella geestiana]	molecular chaperone DnaK [Legionella norrlandica]	molecular chaperone DnaK [Legionella fairfieldensis]	molecular chaperone DnaK [Legionella lansingensis]	molecular chaperone DnaK [Legionella shakespearei]	molecular chaperone DnaK [Legionella wadsworthii]	DnaK suppressor protein [Legionella pneumophila subsp. pneumophila str. Philadelphia 1]	molecular chaperone DnaK [Legionella drancourtii]	molecular chaperone DnaK [Legionella anisa]	molecular chaperone DnaK [Legionella cherrii]	molecular chaperone DnaK [Legionella moravica]	molecular chaperone DnaK [Legionella longbeachae]	molecular chaperone DnaK [Legionella sainthelensi]
WP_025385187.1	lpari_01684	WP_028386587.1	WP_035889750.1	WP_028388080.1	WP_028372658.1	WP_026253931.1	WP_031562604.1	YP_096344.1	WP_006870565.1	WP_019234741.1	WP_028381213.1	WP_028384320.1	WP_003632972.1	WP_027270752.1	glutamyl-tRNA reductase [Legionella oakridgensis]	Glutamyl-tRNA reductase	glutamyl-tRNA reductase [Legionella geestiana]	glutamyl-tRNA reductase [Legionella norrlandica]	glutamyl-tRNA reductase [Legionella fairfieldensis]	glutamyl-tRNA reductase [Legionella lansingensis]	glutamyl-tRNA reductase [Legionella shakespearei]	glutamyl-tRNA reductase [Legionella wadsworthii]	glutamyl-tRNA reductase [Legionella pneumophila subsp. pneumophila str. Philadelphia 1]	glutamyl-tRNA reductase [Legionella drancourtii]	glutamyl-tRNA reductase [Legionella anisa]	glutamyl-tRNA reductase [Legionella cherrii]	glutamyl-tRNA reductase [Legionella moravica]	glutamyl-tRNA reductase [Legionella longbeachae]	glutamyl-tRNA reductase [Legionella sainthelensi]
WP_025385188.1	lpari_01683	WP_028386586.1	WP_035889747.1	WP_028388079.1	WP_028372659.1	WP_018577183.1	WP_031562602.1	YP_096343.1	WP_006870566.1	WP_019234742.1	WP_028381212.1	WP_028384321.1	WP_003632971.1	WP_027270753.1	hypothetical protein [Legionella oakridgensis]	hypothetical protein	hypothetical protein [Legionella geestiana]	hypothetical protein [Legionella norrlandica]	hypothetical protein [Legionella fairfieldensis]	hypothetical protein [Legionella lansingensis]	hypothetical protein [Legionella shakespearei]	hypothetical protein [Legionella wadsworthii]	hypothetical protein lpg2334 [Legionella pneumophila subsp. pneumophila str. Philadelphia 1]	hypothetical protein [Legionella drancourtii]	hypothetical protein [Legionella anisa]	hypothetical protein [Legionella cherrii]	hypothetical protein [Legionella moravica]	hypothetical protein [Legionella longbeachae]	hypothetical protein [Legionella sainthelensi]
WP_025385192.1	lpari_01681	WP_035902448.1	WP_035889732.1	WP_035918074.1	WP_028372661.1	WP_018577185.1	WP_031563757.1	YP_096341.1	WP_040534906.1	WP_019234745.1	WP_028381209.1	WP_028384323.1	WP_003632969.1	WP_027270755.1	competence protein ComF [Legionella oakridgensis]	hypothetical protein	hypothetical protein [Legionella geestiana]	competence protein ComF [Legionella norrlandica]	competence protein ComF [Legionella fairfieldensis]	competence protein ComF [Legionella lansingensis]	hypothetical protein [Legionella shakespearei]	competence protein ComF [Legionella wadsworthii]	competence protein ComF [Legionella pneumophila subsp. pneumophila str. Philadelphia 1]	competence protein ComF [Legionella drancourtii]	hypothetical protein [Legionella anisa]	competence protein ComF [Legionella cherrii]	competence protein ComF [Legionella moravica]	competence protein ComF [Legionella longbeachae]	competence protein ComF [Legionella sainthelensi]
WP_025385194.1	lpari_00365	WP_028386583.1	WP_035890733.1	WP_028388074.1	WP_028372663.1	WP_018578078.1	WP_031563739.1	YP_096652.2	WP_006872488.1	WP_019233614.1	WP_028381051.1	WP_028383137.1	WP_003635447.1	WP_027272044.1	phenylalanine 4-monooxygenase [Legionella oakridgensis]	Phenylalanine-4-hydroxylase	phenylalanine 4-monooxygenase [Legionella geestiana]	phenylalanine 4-monooxygenase [Legionella norrlandica]	phenylalanine 4-monooxygenase [Legionella fairfieldensis]	phenylalanine 4-monooxygenase [Legionella lansingensis]	phenylalanine 4-monooxygenase [Legionella shakespearei]	phenylalanine 4-monooxygenase [Legionella wadsworthii]	phenylalanine 4-monooxygenase [Legionella pneumophila subsp. pneumophila str. Philadelphia 1]	phenylalanine 4-monooxygenase [Legionella drancourtii]	phenylalanine 4-monooxygenase [Legionella anisa]	phenylalanine 4-monooxygenase [Legionella cherrii]	phenylalanine 4-monooxygenase [Legionella moravica]	phenylalanine 4-monooxygenase [Legionella longbeachae]	phenylalanine 4-monooxygenase [Legionella sainthelensi]
WP_025385196.1	lpari_00363	WP_028386581.1	WP_035890730.1	WP_028388072.1	WP_028372665.1	WP_018578080.1	WP_031563741.1	YP_096650.1	WP_006872494.1	WP_019233616.1	WP_028381053.1	WP_028383139.1	WP_012979345.1	WP_027272043.1	excinuclease ABC subunit C [Legionella oakridgensis]	UvrABC system protein C	excinuclease ABC subunit C [Legionella geestiana]	excinuclease ABC subunit C [Legionella norrlandica]	excinuclease ABC subunit C [Legionella fairfieldensis]	excinuclease ABC subunit C [Legionella lansingensis]	excinuclease ABC subunit C [Legionella shakespearei]	excinuclease ABC subunit C [Legionella wadsworthii]	excinuclease ABC subunit C [Legionella pneumophila subsp. pneumophila str. Philadelphia 1]	excinuclease ABC subunit C [Legionella drancourtii]	excinuclease ABC subunit C [Legionella anisa]	excinuclease ABC subunit C [Legionella cherrii]	excinuclease ABC subunit C [Legionella moravica]	excinuclease ABC subunit C [Legionella longbeachae]	excinuclease ABC subunit C [Legionella sainthelensi]
WP_025385197.1	lpari_00362	WP_028386580.1	WP_035891431.1	WP_028388070.1	WP_028372666.1	WP_018578427.1	WP_031563742.1	YP_096646.1	WP_006872508.1	WP_019233617.1	WP_028381054.1	WP_028383143.1	WP_003635452.1	WP_027272042.1	endopeptidase IV [Legionella oakridgensis]	hypothetical protein	endopeptidase IV [Legionella geestiana]	endopeptidase IV [Legionella norrlandica]	endopeptidase IV [Legionella fairfieldensis]	endopeptidase IV [Legionella lansingensis]	enhanced entry protein [Legionella shakespearei]	endopeptidase IV [Legionella wadsworthii]	enhanced entry protein EnhA [Legionella pneumophila subsp. pneumophila str. Philadelphia 1]	enhanced entry protein EnhA [Legionella drancourtii]	enhanced entry protein [Legionella anisa]	endopeptidase IV [Legionella cherrii]	endopeptidase IV [Legionella moravica]	enhanced entry protein EnhA [Legionella longbeachae]	endopeptidase IV [Legionella sainthelensi]
WP_025385199.1	lpari_00360	WP_028386578.1	WP_035891427.1	WP_028388068.1	WP_028372668.1	WP_018578429.1	WP_031563744.1	YP_096644.1	WP_006872510.1	WP_019233619.1	WP_028381056.1	WP_028383145.1	WP_003635457.1	WP_027272040.1	endopeptidase IV [Legionella oakridgensis]	Putative beta-lactamase HcpC	hypothetical protein [Legionella geestiana]	endopeptidase IV [Legionella norrlandica]	endopeptidase IV [Legionella fairfieldensis]	endopeptidase IV [Legionella lansingensis]	hypothetical protein [Legionella shakespearei]	endopeptidase IV [Legionella wadsworthii]	enhanced entry protein EnhC [Legionella pneumophila subsp. pneumophila str. Philadelphia 1]	endopeptidase IV [Legionella drancourtii]	endopeptidase IV [Legionella anisa]	endopeptidase IV [Legionella cherrii]	endopeptidase IV [Legionella moravica]	endopeptidase IV [Legionella longbeachae]	endopeptidase IV [Legionella sainthelensi]
WP_025385202.1	lpari_00355	WP_028386958.1	WP_035891642.1	WP_028387701.1	WP_028372669.1	WP_018578431.1	WP_031563746.1	YP_096641.1	WP_006872512.1	WP_019233624.1	WP_028381062.1	WP_028383148.1	WP_003635474.1	WP_027272032.1	30S ribosomal protein S20 [Legionella oakridgensis]	30S ribosomal protein S20	30S ribosomal protein S20 [Legionella geestiana]	30S ribosomal protein S20 [Legionella norrlandica]	30S ribosomal protein S20 [Legionella fairfieldensis]	30S ribosomal protein S20 [Legionella lansingensis]	30S ribosomal protein S20 [Legionella shakespearei]	30S ribosomal protein S20 [Legionella wadsworthii]	30S ribosomal protein S20 [Legionella pneumophila subsp. pneumophila str. Philadelphia 1]	30S ribosomal protein S20 [Legionella drancourtii]	30S ribosomal protein S20 [Legionella anisa]	30S ribosomal protein S20 [Legionella cherrii]	30S ribosomal protein S20 [Legionella moravica]	30S ribosomal protein S20 [Legionella longbeachae]	30S ribosomal protein S20 [Legionella sainthelensi]
WP_025385207.1	lpari_00354	WP_028386959.1	WP_035891644.1	WP_028387702.1	WP_028372671.1	WP_018578432.1	WP_031563747.1	YP_096640.1	WP_040536274.1	WP_019233625.1	WP_028381063.1	WP_028383149.1	WP_003635481.1	WP_027272030.1	membrane protein [Legionella oakridgensis]	Putative lipid II flippase MurJ	membrane protein [Legionella geestiana]	membrane protein [Legionella norrlandica]	membrane protein [Legionella fairfieldensis]	membrane protein [Legionella lansingensis]	membrane protein [Legionella shakespearei]	membrane protein [Legionella wadsworthii]	virulence factor MviN [Legionella pneumophila subsp. pneumophila str. Philadelphia 1]	membrane protein [Legionella drancourtii]	membrane protein [Legionella anisa]	membrane protein [Legionella cherrii]	membrane protein [Legionella moravica]	membrane protein [Legionella longbeachae]	membrane protein [Legionella sainthelensi]
WP_025385211.1	lpari_00351	WP_028387390.1	WP_035886846.1	WP_028387705.1	WP_028372673.1	WP_018578435.1	WP_031563750.1	YP_096637.1	WP_006872517.1	WP_019233628.1	WP_028381066.1	WP_028383153.1	WP_003635490.1	WP_027272345.1	DNA polymerase III subunit chi [Legionella oakridgensis]	DNA polymerase III subunit chi	DNA polymerase III subunit chi [Legionella geestiana]	DNA polymerase III subunit chi [Legionella norrlandica]	DNA polymerase III subunit chi [Legionella fairfieldensis]	DNA polymerase III subunit chi [Legionella lansingensis]	DNA polymerase III subunit chi [Legionella shakespearei]	DNA polymerase III subunit chi [Legionella wadsworthii]	DNA polymerase III subunit chi [Legionella pneumophila subsp. pneumophila str. Philadelphia 1]	DNA polymerase III subunit chi [Legionella drancourtii]	DNA polymerase III subunit chi [Legionella anisa]	DNA polymerase III subunit chi [Legionella cherrii]	DNA polymerase III subunit chi [Legionella moravica]	DNA polymerase III subunit chi [Legionella longbeachae]	DNA polymerase III subunit chi [Legionella sainthelensi]
WP_025385212.1	lpari_00350	WP_028387389.1	WP_035886848.1	WP_028387706.1	WP_028372674.1	WP_018578436.1	WP_031563751.1	YP_096636.1	WP_006872518.1	WP_019233629.1	WP_028381067.1	WP_028383154.1	WP_003635493.1	WP_027272346.1	aminopeptidase A [Legionella oakridgensis]	Cytosol aminopeptidase	aminopeptidase A [Legionella geestiana]	aminopeptidase A [Legionella norrlandica]	aminopeptidase A [Legionella fairfieldensis]	aminopeptidase A [Legionella lansingensis]	aminopeptidase A [Legionella shakespearei]	aminopeptidase A [Legionella wadsworthii]	aminopeptidase [Legionella pneumophila subsp. pneumophila str. Philadelphia 1]	aminopeptidase A [Legionella drancourtii]	aminopeptidase A [Legionella anisa]	aminopeptidase A [Legionella cherrii]	aminopeptidase A [Legionella moravica]	aminopeptidase A [Legionella longbeachae]	aminopeptidase A [Legionella sainthelensi]
WP_025385213.1	lpari_02933	WP_028387388.1	WP_035886849.1	WP_028387982.1	WP_028372675.1	WP_018578437.1	WP_031563026.1	YP_096635.1	WP_006872008.1	WP_040523014.1	WP_028380782.1	WP_028383155.1	WP_003633167.1	WP_027270953.1	LPS export ABC transporter permease LptF [Legionella oakridgensis]	Lipopolysaccharide export system permease protein LptF	LPS export ABC transporter permease LptF [Legionella geestiana]	LPS export ABC transporter permease LptF [Legionella norrlandica]	LPS export ABC transporter permease LptF [Legionella fairfieldensis]	LPS export ABC transporter permease LptF [Legionella lansingensis]	LPS export ABC transporter permease LptF [Legionella shakespearei]	LPS export ABC transporter permease LptF [Legionella wadsworthii]	permease [Legionella pneumophila subsp. pneumophila str. Philadelphia 1]	LPS export ABC transporter permease LptF [Legionella drancourtii]	LPS export ABC transporter permease LptF [Legionella anisa]	LPS export ABC transporter permease LptF [Legionella cherrii]	LPS export ABC transporter permease LptF [Legionella moravica]	LPS export ABC transporter permease LptF [Legionella longbeachae]	LPS export ABC transporter permease LptF [Legionella sainthelensi]
WP_025385215.1	lpari_02700	WP_028386128.1	WP_035888961.1	WP_028388265.1	WP_028372257.1	WP_018576251.1	WP_031567771.1	YP_096034.1	WP_006870360.1	WP_019233676.1	WP_028382157.1	WP_028385282.1	WP_012978921.1	WP_027270616.1	hypothetical protein [Legionella oakridgensis]	hypothetical protein	hypothetical protein [Legionella geestiana]	hypothetical protein [Legionella norrlandica]	hypothetical protein [Legionella fairfieldensis]	hypothetical protein [Legionella lansingensis]	hypothetical protein [Legionella shakespearei]	hypothetical protein [Legionella wadsworthii]	hypothetical protein lpg2018 [Legionella pneumophila subsp. pneumophila str. Philadelphia 1]	hypothetical protein [Legionella drancourtii]	hypothetical protein [Legionella anisa]	hypothetical protein [Legionella cherrii]	hypothetical protein [Legionella moravica]	hypothetical protein [Legionella longbeachae]	hypothetical protein [Legionella sainthelensi]
WP_025385216.1	lpari_02699	WP_051550843.1	WP_035888960.1	WP_028388266.1	WP_051546043.1	WP_018576252.1	WP_031567768.1	YP_096033.1	WP_006870359.1	WP_019233675.1	WP_028382156.1	WP_028385283.1	WP_003632451.1	WP_027270617.1	hypothetical protein [Legionella oakridgensis]	hypothetical protein	hypothetical protein [Legionella geestiana]	hypothetical protein [Legionella norrlandica]	hypothetical protein [Legionella fairfieldensis]	hypothetical protein [Legionella lansingensis]	hypothetical protein [Legionella shakespearei]	hypothetical protein [Legionella wadsworthii]	hypothetical protein lpg2017 [Legionella pneumophila subsp. pneumophila str. Philadelphia 1]	hypothetical protein [Legionella drancourtii]	hypothetical protein [Legionella anisa]	hypothetical protein [Legionella cherrii]	hypothetical protein [Legionella moravica]	hypothetical protein [Legionella longbeachae]	hypothetical protein [Legionella sainthelensi]
WP_025385217.1	lpari_02698	WP_028386126.1	WP_035888956.1	WP_028388267.1	WP_028372259.1	WP_018576253.1	WP_031567766.1	YP_096032.1	WP_006870358.1	WP_019233674.1	WP_028382155.1	WP_028385284.1	WP_003632450.1	WP_027270618.1	hypothetical protein [Legionella oakridgensis]	hypothetical protein	hypothetical protein [Legionella geestiana]	hypothetical protein [Legionella norrlandica]	hypothetical protein [Legionella fairfieldensis]	hypothetical protein [Legionella lansingensis]	hypothetical protein [Legionella shakespearei]	hypothetical protein [Legionella wadsworthii]	hypothetical protein lpg2016 [Legionella pneumophila subsp. pneumophila str. Philadelphia 1]	hypothetical protein [Legionella drancourtii]	hypothetical protein [Legionella anisa]	hypothetical protein [Legionella cherrii]	hypothetical protein [Legionella moravica]	hypothetical protein [Legionella longbeachae]	hypothetical protein [Legionella sainthelensi]
WP_025385218.1	lpari_02697	WP_035901970.1	WP_035888952.1	WP_028388269.1	WP_028372261.1	WP_018576255.1	WP_031567765.1	YP_096030.1	WP_006870357.1	WP_019233673.1	WP_028382154.1	WP_028385286.1	WP_003632449.1	WP_027270619.1	YggS family pyridoxal phosphate enzyme [Legionella oakridgensis]	hypothetical protein	YggS family pyridoxal phosphate enzyme [Legionella geestiana]	YggS family pyridoxal phosphate enzyme [Legionella norrlandica]	YggS family pyridoxal phosphate enzyme [Legionella fairfieldensis]	YggS family pyridoxal phosphate enzyme [Legionella lansingensis]	YggS family pyridoxal phosphate enzyme [Legionella shakespearei]	YggS family pyridoxal phosphate enzyme [Legionella wadsworthii]	pyridoxal-5'-phosphate dependent enzyme family protein [Legionella pneumophila subsp. pneumophila str. Philadelphia 1]	YggS family pyridoxal phosphate enzyme [Legionella drancourtii]	YggS family pyridoxal phosphate enzyme [Legionella anisa]	YggS family pyridoxal phosphate enzyme [Legionella cherrii]	YggS family pyridoxal phosphate enzyme [Legionella moravica]	YggS family pyridoxal phosphate enzyme [Legionella longbeachae]	YggS family pyridoxal phosphate enzyme [Legionella sainthelensi]
WP_025385223.1	lpari_02692	WP_028386121.1	WP_035889042.1	WP_028388273.1	WP_028374240.1	WP_018576259.1	WP_035899184.1	YP_096026.1	WP_040534679.1	WP_019233669.1	WP_035901204.1	WP_028385293.1	WP_012978925.1	WP_035905914.1	guanylate kinase [Legionella oakridgensis]	Guanylate kinase	guanylate kinase [Legionella geestiana]	guanylate kinase [Legionella norrlandica]	guanylate kinase [Legionella fairfieldensis]	guanylate kinase [Legionella lansingensis]	guanylate kinase [Legionella shakespearei]	guanylate kinase [Legionella wadsworthii]	guanylate kinase [Legionella pneumophila subsp. pneumophila str. Philadelphia 1]	guanylate kinase [Legionella drancourtii]	guanylate kinase [Legionella anisa]	guanylate kinase [Legionella cherrii]	guanylate kinase [Legionella moravica]	guanylate kinase [Legionella longbeachae]	guanylate kinase [Legionella sainthelensi]
WP_025385225.1	lpari_02690	WP_028386119.1	WP_035888945.1	WP_028388275.1	WP_028374238.1	WP_018576261.1	WP_031567754.1	YP_096025.1	WP_006870333.1	WP_019233668.1	WP_028382148.1	WP_028385295.1	WP_003632438.1	WP_027270626.1	(p)ppGpp synthetase [Legionella oakridgensis]	Bifunctional (p)ppGpp synthase/hydrolase SpoT	(p)ppGpp synthetase [Legionella geestiana]	(p)ppGpp synthetase [Legionella norrlandica]	(p)ppGpp synthetase [Legionella fairfieldensis]	(p)ppGpp synthetase [Legionella lansingensis]	bifunctional (p)ppGpp synthetase II/ guanosine-3',5'-bis pyrophosphate 3'-pyrophosphohydrolase [Legionella shakespearei]	(p)ppGpp synthetase [Legionella wadsworthii]	guanosine-3',5'-bis(diphosphate) 3'-pyrophosphohydrolase [Legionella pneumophila subsp. pneumophila str. Philadelphia 1]	bifunctional (p)ppGpp synthetase II/ guanosine-3',5'-bis pyrophosphate 3'-pyrophosphohydrolase [Legionella drancourtii]	bifunctional (p)ppGpp synthetase II/ guanosine-3',5'-bis pyrophosphate 3'-pyrophosphohydrolase [Legionella anisa]	(p)ppGpp synthetase [Legionella cherrii]	(p)ppGpp synthetase [Legionella moravica]	bifunctional (p)ppGpp synthetase II/ guanosine-3',5'-bis pyrophosphate 3'-pyrophosphohydrolase [Legionella longbeachae]	(p)ppGpp synthetase [Legionella sainthelensi]
WP_025385226.1	lpari_02689	WP_028386118.1	WP_035888943.1	WP_028388276.1	WP_028374237.1	WP_018576262.1	WP_031567753.1	YP_096024.1	WP_006870332.1	WP_019233667.1	WP_028382147.1	WP_028385296.1	WP_012978927.1	WP_027270627.1	endoribonuclease [Legionella oakridgensis]	2-iminobutanoate/2-iminopropanoate deaminase	endoribonuclease [Legionella geestiana]	endoribonuclease [Legionella norrlandica]	endoribonuclease [Legionella fairfieldensis]	endoribonuclease [Legionella lansingensis]	reactive intermediate/imine deaminase [Legionella shakespearei]	endoribonuclease [Legionella wadsworthii]	endoribonuclease L-PSP [Legionella pneumophila subsp. pneumophila str. Philadelphia 1]	reactive intermediate/imine deaminase [Legionella drancourtii]	reactive intermediate/imine deaminase [Legionella anisa]	endoribonuclease [Legionella cherrii]	endoribonuclease [Legionella moravica]	reactive intermediate/imine deaminase [Legionella longbeachae]	endoribonuclease [Legionella sainthelensi]
WP_025385229.1	lpari_01712	WP_028386115.1	WP_035890086.1	WP_035918130.1	WP_028373592.1	WP_018575876.1	WP_031565302.1	YP_095887.1	WP_040535623.1	WP_019232027.1	WP_028380261.1	WP_028383109.1	WP_003631990.1	WP_027270209.1	integrase [Legionella oakridgensis]	Tyrosine recombinase XerC	integrase [Legionella geestiana]	integrase [Legionella norrlandica]	integrase [Legionella fairfieldensis]	integrase [Legionella lansingensis]	integrase [Legionella shakespearei]	integrase [Legionella wadsworthii]	site specific recombinase, phage integrase [Legionella pneumophila subsp. pneumophila str. Philadelphia 1]	integrase [Legionella drancourtii]	integrase [Legionella anisa]	integrase [Legionella cherrii]	integrase [Legionella moravica]	integrase [Legionella longbeachae]	integrase [Legionella sainthelensi]
WP_025385230.1	lpari_01717	WP_028386111.1	WP_035890087.1	WP_028388285.1	WP_028373591.1	WP_018575878.1	WP_031565304.1	YP_095886.1	WP_006871617.1	WP_040521874.1	WP_028380262.1	WP_028383108.1	WP_003631989.1	WP_027270208.1	trigger factor [Legionella oakridgensis]	Trigger factor	trigger factor [Legionella geestiana]	trigger factor [Legionella norrlandica]	trigger factor [Legionella fairfieldensis]	trigger factor [Legionella lansingensis]	trigger factor [Legionella shakespearei]	trigger factor [Legionella wadsworthii]	trigger factor [Legionella pneumophila subsp. pneumophila str. Philadelphia 1]	trigger factor [Legionella drancourtii]	trigger factor [Legionella anisa]	trigger factor [Legionella cherrii]	trigger factor [Legionella moravica]	trigger factor [Legionella longbeachae]	trigger factor [Legionella sainthelensi]
WP_025385235.1	lpari_03265	WP_028386104.1	WP_035888492.1	WP_028388295.1	WP_028373581.1	WP_018575886.1	WP_031567530.1	YP_095879.1	WP_006870284.1	WP_019235435.1	WP_028382019.1	WP_028383099.1	WP_003632286.1	WP_027271567.1	uridine kinase [Legionella oakridgensis]	Uridine kinase	uridine kinase [Legionella geestiana]	uridine kinase [Legionella norrlandica]	uridine kinase [Legionella fairfieldensis]	uridine kinase [Legionella lansingensis]	uridine/cytidine kinase [Legionella shakespearei]	uridine kinase [Legionella wadsworthii]	uridine kinase [Legionella pneumophila subsp. pneumophila str. Philadelphia 1]	uridine/cytidine kinase [Legionella drancourtii]	uridine/cytidine kinase [Legionella anisa]	uridine kinase [Legionella cherrii]	uridine kinase [Legionella moravica]	uridine/cytidine kinase [Legionella longbeachae]	uridine kinase [Legionella sainthelensi]
WP_025385236.1	lpari_01664	WP_028386103.1	WP_035888897.1	WP_028388296.1	WP_028373580.1	WP_018577215.1	WP_031563771.1	YP_096314.1	WP_040534823.1	WP_040523095.1	WP_028381194.1	WP_028384826.1	WP_003632947.1	WP_027270771.1	hypothetical protein [Legionella oakridgensis]	putative DNA endonuclease SmrA	hypothetical protein [Legionella geestiana]	DNA mismatch repair protein MutS [Legionella norrlandica]	DNA mismatch repair protein MutS [Legionella fairfieldensis]	hypothetical protein [Legionella lansingensis]	hypothetical protein [Legionella shakespearei]	DNA mismatch repair protein MutS [Legionella wadsworthii]	Smr domain-containing protein [Legionella pneumophila subsp. pneumophila str. Philadelphia 1]	DNA mismatch repair protein MutS [Legionella drancourtii]	DNA mismatch repair protein MutS [Legionella anisa]	DNA mismatch repair protein MutS [Legionella cherrii]	DNA mismatch repair protein MutS [Legionella moravica]	DNA mismatch repair protein MutS [Legionella longbeachae]	DNA mismatch repair protein MutS [Legionella sainthelensi]
WP_025385243.1	lpari_01662	WP_028386102.1	WP_035888898.1	WP_028388297.1	WP_028373579.1	WP_018577216.1	WP_031563772.1	YP_096313.1	WP_006870599.1	WP_019234761.1	WP_028381193.1	WP_035922233.1	WP_003632945.1	WP_027270772.1	SAM-dependent methyltransferase [Legionella oakridgensis]	50S ribosomal protein L3 glutamine methyltransferase	SAM-dependent methyltransferase [Legionella geestiana]	SAM-dependent methyltransferase [Legionella norrlandica]	SAM-dependent methyltransferase [Legionella fairfieldensis]	SAM-dependent methyltransferase [Legionella lansingensis]	N5-glutamine S-adenosyl-L-methionine-dependent methyltransferase [Legionella shakespearei]	SAM-dependent methyltransferase [Legionella wadsworthii]	N5-glutamine S-adenosyl-L-methionine-dependent methyltransferase [Legionella pneumophila subsp. pneumophila str. Philadelphia 1]	N5-glutamine S-adenosyl-L-methionine-dependent methyltransferase [Legionella drancourtii]	N5-glutamine S-adenosyl-L-methionine-dependent methyltransferase [Legionella anisa]	SAM-dependent methyltransferase [Legionella cherrii]	SAM-dependent methyltransferase [Legionella moravica]	N5-glutamine S-adenosyl-L-methionine-dependent methyltransferase [Legionella longbeachae]	SAM-dependent methyltransferase [Legionella sainthelensi]
WP_025385244.1	lpari_01660	WP_028386100.1	WP_035888899.1	WP_028388299.1	WP_028373577.1	WP_018577218.1	WP_031563774.1	YP_096311.1	WP_040534825.1	WP_019234763.1	WP_028381191.1	WP_028384823.1	WP_003632942.1	WP_027270774.1	aspartate-semialdehyde dehydrogenase [Legionella oakridgensis]	Aspartate-semialdehyde dehydrogenase 2	aspartate-semialdehyde dehydrogenase [Legionella geestiana]	aspartate-semialdehyde dehydrogenase [Legionella norrlandica]	aspartate-semialdehyde dehydrogenase [Legionella fairfieldensis]	aspartate-semialdehyde dehydrogenase [Legionella lansingensis]	semialdehyde dehydrogenase [Legionella shakespearei]	aspartate-semialdehyde dehydrogenase [Legionella wadsworthii]	aspartate semialdehyde dehydrogenase [Legionella pneumophila subsp. pneumophila str. Philadelphia 1]	aspartate-semialdehyde dehydrogenase [Legionella drancourtii]	semialdehyde dehydrogenase [Legionella anisa]	aspartate-semialdehyde dehydrogenase [Legionella cherrii]	aspartate-semialdehyde dehydrogenase [Legionella moravica]	semialdehyde dehydrogenase [Legionella longbeachae]	aspartate-semialdehyde dehydrogenase [Legionella sainthelensi]
WP_025385246.1	lpari_01658	WP_028386099.1	WP_035888901.1	WP_028388300.1	WP_028373576.1	WP_018577323.1	WP_031563776.1	YP_096309.1	WP_006870604.1	WP_019234765.1	WP_028381189.1	WP_028384821.1	WP_003632937.1	WP_027270776.1	hypothetical protein [Legionella oakridgensis]	hypothetical protein	hypothetical protein [Legionella geestiana]	hypothetical protein [Legionella norrlandica]	hypothetical protein [Legionella fairfieldensis]	hypothetical protein [Legionella lansingensis]	hypothetical protein [Legionella shakespearei]	hypothetical protein [Legionella wadsworthii]	ankyrin repeat-containing protein [Legionella pneumophila subsp. pneumophila str. Philadelphia 1]	hypothetical protein [Legionella drancourtii]	hypothetical protein [Legionella anisa]	hypothetical protein [Legionella cherrii]	hypothetical protein [Legionella moravica]	hypothetical protein [Legionella longbeachae]	hypothetical protein [Legionella sainthelensi]
WP_025385247.1	lpari_01655	WP_051550841.1	WP_052117592.1	WP_051555136.1	WP_051546180.1	WP_018577315.1	WP_051635450.1	YP_096306.1	WP_006870608.1	WP_019234768.1	WP_051544455.1	WP_051190695.1	WP_003632932.1	WP_035905973.1	hypothetical protein [Legionella oakridgensis]	Ribonuclease E	hypothetical protein [Legionella geestiana]	hypothetical protein [Legionella norrlandica]	hypothetical protein [Legionella fairfieldensis]	hypothetical protein [Legionella lansingensis]	ribonuclease E [Legionella shakespearei]	hypothetical protein [Legionella wadsworthii]	ribonuclease E [Legionella pneumophila subsp. pneumophila str. Philadelphia 1]	ribonuclease E [Legionella drancourtii]	ribonuclease E [Legionella anisa]	hypothetical protein [Legionella cherrii]	hypothetical protein [Legionella moravica]	ribonuclease E [Legionella longbeachae]	hypothetical protein, partial [Legionella sainthelensi]
WP_025385249.1	lpari_01652	WP_028386096.1	WP_035888911.1	WP_028388309.1	WP_028373574.1	WP_018577313.1	WP_031563782.1	YP_096303.1	WP_006870610.1	WP_019234771.1	WP_028381184.1	WP_028384814.1	WP_003632927.1	WP_027270781.1	haloacid dehalogenase [Legionella oakridgensis]	Phosphoglycolate phosphatase	haloacid dehalogenase [Legionella geestiana]	haloacid dehalogenase [Legionella norrlandica]	haloacid dehalogenase [Legionella fairfieldensis]	haloacid dehalogenase [Legionella lansingensis]	haloacid dehalogenase [Legionella shakespearei]	haloacid dehalogenase [Legionella wadsworthii]	HAD superfamily hydrolase [Legionella pneumophila subsp. pneumophila str. Philadelphia 1]	haloacid dehalogenase [Legionella drancourtii]	haloacid dehalogenase [Legionella anisa]	haloacid dehalogenase [Legionella cherrii]	haloacid dehalogenase [Legionella moravica]	haloacid dehalogenase [Legionella longbeachae]	haloacid dehalogenase [Legionella sainthelensi]
WP_025385250.1	lpari_01651	WP_028386095.1	WP_035888914.1	WP_028388310.1	WP_028373573.1	WP_018577312.1	WP_031563783.1	YP_096302.1	WP_006870611.1	WP_040523126.1	WP_028381183.1	WP_028384813.1	WP_003632926.1	WP_027270782.1	CDP-diacylglycerol--glycerol-3-phosphate 3-phosphatidyltransferase [Legionella oakridgensis]	CDP-diacylglycerol--glycerol-3-phosphate 3-phosphatidyltransferase	CDP-diacylglycerol--glycerol-3-phosphate 3-phosphatidyltransferase [Legionella geestiana]	CDP-diacylglycerol--glycerol-3-phosphate 3-phosphatidyltransferase [Legionella norrlandica]	CDP-diacylglycerol--glycerol-3-phosphate 3-phosphatidyltransferase [Legionella fairfieldensis]	CDP-diacylglycerol--glycerol-3-phosphate 3-phosphatidyltransferase [Legionella lansingensis]	CDP-diacylglycerol--glycerol-3-phosphate 3-phosphatidyltransferase [Legionella shakespearei]	CDP-diacylglycerol--glycerol-3-phosphate 3-phosphatidyltransferase [Legionella wadsworthii]	CDP-diacylglycerol--glycerol-3-phosphate 3-phosphatidyltransferase [Legionella pneumophila subsp. pneumophila str. Philadelphia 1]	CDP-diacylglycerol--glycerol-3-phosphate 3-phosphatidyltransferase [Legionella drancourtii]	CDP-diacylglycerol--glycerol-3-phosphate 3-phosphatidyltransferase [Legionella anisa]	CDP-diacylglycerol--glycerol-3-phosphate 3-phosphatidyltransferase [Legionella cherrii]	CDP-diacylglycerol--glycerol-3-phosphate 3-phosphatidyltransferase [Legionella moravica]	CDP-diacylglycerol--glycerol-3-phosphate 3-phosphatidyltransferase [Legionella longbeachae]	CDP-diacylglycerol--glycerol-3-phosphate 3-phosphatidyltransferase [Legionella sainthelensi]
WP_025385251.1	lpari_02526	WP_028386666.1	WP_035890643.1	WP_028387745.1	WP_028372710.1	WP_018575797.1	WP_031565221.1	YP_095940.1	WP_006871536.1	WP_019231976.1	WP_028380209.1	WP_028385347.1	WP_003632060.1	WP_027270262.1	ferredoxin [Legionella oakridgensis]	Ferredoxin 1	ferredoxin [Legionella geestiana]	ferredoxin [Legionella norrlandica]	ferredoxin [Legionella fairfieldensis]	ferredoxin [Legionella lansingensis]	ferredoxin [Legionella shakespearei]	ferredoxin [Legionella wadsworthii]	ferredoxin II (4Fe-4S) [Legionella pneumophila subsp. pneumophila str. Philadelphia 1]	ferredoxin [Legionella drancourtii]	ferredoxin [Legionella anisa]	ferredoxin [Legionella cherrii]	ferredoxin [Legionella moravica]	ferredoxin [Legionella longbeachae]	ferredoxin [Legionella sainthelensi]
WP_025385252.1	lpari_02525	WP_028386667.1	WP_035890644.1	WP_028387746.1	WP_028372711.1	WP_026253799.1	WP_051635521.1	YP_095939.1	WP_040535591.1	WP_019231977.1	WP_028380210.1	WP_028385348.1	WP_003632059.1	WP_027270261.1	ATP-dependent DNA helicase DinG [Legionella oakridgensis]	hypothetical protein	ATP-dependent DNA helicase DinG [Legionella geestiana]	ATP-dependent DNA helicase DinG [Legionella norrlandica]	ATP-dependent DNA helicase DinG [Legionella fairfieldensis]	ATP-dependent DNA helicase DinG [Legionella lansingensis]	ATP-dependent DNA helicase DinG [Legionella shakespearei]	ATP-dependent DNA helicase DinG [Legionella wadsworthii]	DEAD/DEAH box helicase [Legionella pneumophila subsp. pneumophila str. Philadelphia 1]	ATP-dependent DNA helicase DinG [Legionella drancourtii]	ATP-dependent DNA helicase DinG [Legionella anisa]	ATP-dependent DNA helicase DinG [Legionella cherrii]	ATP-dependent DNA helicase DinG [Legionella moravica]	ATP-dependent DNA helicase DinG [Legionella longbeachae]	ATP-dependent DNA helicase DinG [Legionella sainthelensi]
WP_025385253.1	lpari_02524	WP_028386668.1	WP_035890645.1	WP_028387747.1	WP_028372712.1	WP_018575799.1	WP_031565226.1	YP_095938.1	WP_006871538.1	WP_019231978.1	WP_035900420.1	WP_035922543.1	WP_003632058.1	WP_027270260.1	tRNA threonylcarbamoyladenosine biosynthesis protein TsaB [Legionella oakridgensis]	tRNA threonylcarbamoyladenosine biosynthesis protein TsaB	tRNA threonylcarbamoyladenosine biosynthesis protein TsaB [Legionella geestiana]	tRNA threonylcarbamoyladenosine biosynthesis protein TsaB [Legionella norrlandica]	tRNA threonylcarbamoyladenosine biosynthesis protein TsaB [Legionella fairfieldensis]	tRNA threonylcarbamoyladenosine biosynthesis protein TsaB [Legionella lansingensis]	tRNA threonylcarbamoyladenosine biosynthesis protein TsaB [Legionella shakespearei]	tRNA threonylcarbamoyladenosine biosynthesis protein TsaB [Legionella wadsworthii]	glycoprotease [Legionella pneumophila subsp. pneumophila str. Philadelphia 1]	tRNA threonylcarbamoyladenosine biosynthesis protein TsaB [Legionella drancourtii]	tRNA threonylcarbamoyladenosine biosynthesis protein TsaB [Legionella anisa]	tRNA threonylcarbamoyladenosine biosynthesis protein TsaB [Legionella cherrii]	tRNA threonylcarbamoyladenosine biosynthesis protein TsaB [Legionella moravica]	tRNA threonylcarbamoyladenosine biosynthesis protein TsaB [Legionella longbeachae]	tRNA threonylcarbamoyladenosine biosynthesis protein TsaB [Legionella sainthelensi]
WP_025385255.1	lpari_02378	WP_028386757.1	WP_035890646.1	WP_028387749.1	WP_028372714.1	WP_018575801.1	WP_031566589.1	YP_095936.1	WP_006870018.1	WP_019232551.1	WP_028381557.1	WP_028385351.1	WP_003634155.1	WP_027270527.1	3-deoxy-manno-octulosonate cytidylyltransferase [Legionella oakridgensis]	3-deoxy-manno-octulosonate cytidylyltransferase	3-deoxy-manno-octulosonate cytidylyltransferase [Legionella geestiana]	3-deoxy-manno-octulosonate cytidylyltransferase [Legionella norrlandica]	3-deoxy-manno-octulosonate cytidylyltransferase [Legionella fairfieldensis]	3-deoxy-manno-octulosonate cytidylyltransferase [Legionella lansingensis]	hypothetical protein [Legionella shakespearei]	3-deoxy-manno-octulosonate cytidylyltransferase [Legionella wadsworthii]	3-deoxy-manno-octulosonate cytidylyltransferase [Legionella pneumophila subsp. pneumophila str. Philadelphia 1]	3-deoxy-manno-octulosonate cytidylyltransferase [Legionella drancourtii]	3-deoxy-manno-octulosonate cytidylyltransferase [Legionella anisa]	3-deoxy-manno-octulosonate cytidylyltransferase [Legionella cherrii]	3-deoxy-manno-octulosonate cytidylyltransferase [Legionella moravica]	3-deoxy-manno-octulosonate cytidylyltransferase [Legionella longbeachae]	3-deoxy-manno-octulosonate cytidylyltransferase [Legionella sainthelensi]
WP_025385259.1	lpari_02521	WP_028385928.1	WP_035890649.1	WP_028388011.1	WP_028372719.1	WP_018575807.1	WP_031565233.1	YP_095933.1	WP_006871542.1	WP_019231981.1	WP_028380215.1	WP_028384230.1	WP_003632054.1	WP_027270257.1	hypothetical protein [Legionella oakridgensis]	hypothetical protein	hypothetical protein [Legionella geestiana]	regulator of murein genes BolA [Legionella norrlandica]	hypothetical protein [Legionella fairfieldensis]	hypothetical protein [Legionella lansingensis]	hypothetical protein [Legionella shakespearei]	BolA family transcriptional regulator [Legionella wadsworthii]	regulator of murein genes BolA [Legionella pneumophila subsp. pneumophila str. Philadelphia 1]	BolA family transcriptional regulator [Legionella drancourtii]	BolA family transcriptional regulator [Legionella anisa]	BolA family transcriptional regulator [Legionella cherrii]	hypothetical protein [Legionella moravica]	BolA family transcriptional regulator [Legionella longbeachae]	BolA family transcriptional regulator [Legionella sainthelensi]
WP_025385261.1	lpari_02520	WP_028385927.1	WP_035890651.1,WP_035890650.1	WP_028388018.1	WP_028372720.1	WP_018575809.1,WP_018575808.1	WP_031565235.1	YP_095932.1,YP_095931.1	WP_006871544.1	WP_019231982.1	WP_028380216.1	WP_028384232.1,WP_028384231.1	WP_003632053.1	WP_027270256.1	pilus assembly protein [Legionella oakridgensis]	Fimbrial protein	hypothetical protein [Legionella geestiana]	NA	pilus assembly protein [Legionella fairfieldensis]	pilus assembly protein [Legionella lansingensis]	NA	pilus assembly protein [Legionella wadsworthii]	NA	pilus assembly protein [Legionella drancourtii]	pilus assembly protein [Legionella anisa]	pilus assembly protein [Legionella cherrii]	NA	pilus assembly protein [Legionella longbeachae]	pilus assembly protein [Legionella sainthelensi]
WP_025385262.1	lpari_02519	WP_028385926.1	WP_035890656.1	WP_028388020.1	WP_028372721.1	WP_018575811.1	WP_031565237.1	YP_095930.1	WP_006871545.1	WP_019231983.1	WP_028380217.1	WP_028384234.1	WP_003632052.1	WP_027270255.1	6-phosphofructokinase [Legionella oakridgensis]	Pyrophosphate--fructose 6-phosphate 1-phosphotransferase	6-phosphofructokinase [Legionella geestiana]	6-phosphofructokinase [Legionella norrlandica]	6-phosphofructokinase [Legionella fairfieldensis]	6-phosphofructokinase [Legionella lansingensis]	6-phosphofructokinase [Legionella shakespearei]	6-phosphofructokinase [Legionella wadsworthii]	6-phosphofructokinase [Legionella pneumophila subsp. pneumophila str. Philadelphia 1]	6-phosphofructokinase [Legionella drancourtii]	6-phosphofructokinase [Legionella anisa]	6-phosphofructokinase [Legionella cherrii]	6-phosphofructokinase [Legionella moravica]	6-phosphofructokinase [Legionella longbeachae]	6-phosphofructokinase [Legionella sainthelensi]
WP_025385264.1	lpari_02516	WP_028385925.1	WP_035890657.1	WP_028388022.1	WP_028372723.1	WP_018575813.1	WP_031565239.1	YP_095928.1	WP_040535596.1	WP_019231985.1	WP_028380219.1	WP_028384236.1	WP_003632050.1	WP_027270253.1	glutamyl-tRNA synthetase [Legionella oakridgensis]	Glutamate--tRNA ligase	glutamyl-tRNA synthetase [Legionella geestiana]	glutamyl-tRNA synthetase [Legionella norrlandica]	glutamyl-tRNA synthetase [Legionella fairfieldensis]	glutamyl-tRNA synthetase [Legionella lansingensis]	glutaminyl-tRNA synthetase [Legionella shakespearei]	glutamyl-tRNA synthetase [Legionella wadsworthii]	glutamyl-tRNA synthetase [Legionella pneumophila subsp. pneumophila str. Philadelphia 1]	glutamyl-tRNA synthetase [Legionella drancourtii]	glutaminyl-tRNA synthetase [Legionella anisa]	glutamyl-tRNA synthetase [Legionella cherrii]	glutamyl-tRNA synthetase [Legionella moravica]	glutaminyl-tRNA synthetase [Legionella longbeachae]	glutamyl-tRNA synthetase [Legionella sainthelensi]
WP_025385270.1	lpari_01711	WP_028386903.1	WP_035890084.1	WP_028388710.1	WP_028372751.1	WP_018575875.1	WP_031565300.1	YP_095888.1	WP_006871614.1	WP_019232026.1	WP_028380260.1	WP_028383110.1	WP_003631991.1	WP_027270210.1	ABC transporter ATP-binding protein [Legionella oakridgensis]	putative ABC transporter ATP-binding protein YheS	ABC transporter ATP-binding protein [Legionella geestiana]	ABC transporter ATP-binding protein [Legionella norrlandica]	ABC transporter ATP-binding protein [Legionella fairfieldensis]	ABC transporter ATP-binding protein [Legionella lansingensis]	ABC transporter ATP-binding protein [Legionella shakespearei]	ABC transporter ATP-binding protein [Legionella wadsworthii]	ABC transporter ATP-binding protein [Legionella pneumophila subsp. pneumophila str. Philadelphia 1]	ABC transporter ATP-binding protein [Legionella drancourtii]	ABC transporter ATP-binding protein [Legionella anisa]	ABC transporter ATP-binding protein [Legionella cherrii]	ABC transporter ATP-binding protein [Legionella moravica]	ABC transporter ATP-binding protein [Legionella longbeachae]	ABC transporter ATP-binding protein [Legionella sainthelensi]
WP_025385275.1	lpari_01708	WP_028386902.1	WP_035890071.1	WP_028388712.1	WP_035915119.1	WP_026253806.1	WP_031565298.1	YP_095889.1	WP_006871608.1	WP_019232023.1	WP_028380259.1	WP_028383111.1	WP_003631992.1	WP_027270213.1	ribonuclease III [Legionella oakridgensis]	Ribonuclease 3	ribonuclease III [Legionella geestiana]	ribonuclease III [Legionella norrlandica]	ribonuclease III [Legionella fairfieldensis]	ribonuclease III [Legionella lansingensis]	ribonuclease III [Legionella shakespearei]	ribonuclease III [Legionella wadsworthii]	ribonuclease III [Legionella pneumophila subsp. pneumophila str. Philadelphia 1]	ribonuclease III [Legionella drancourtii]	ribonuclease III [Legionella anisa]	ribonuclease III [Legionella cherrii]	ribonuclease III [Legionella moravica]	ribonuclease III [Legionella longbeachae]	ribonuclease III [Legionella sainthelensi]
WP_025385276.1	lpari_01704	WP_028387379.1	WP_035890049.1	WP_028388714.1	WP_028372740.1	WP_026253805.1	WP_051635523.1	YP_095892.1	WP_006871605.1	WP_019232020.1	WP_028380256.1	WP_028383114.1	WP_003631995.1	WP_027270216.1	elongation factor 4 [Legionella oakridgensis]	Elongation factor 4	elongation factor 4 [Legionella geestiana]	elongation factor 4 [Legionella norrlandica]	elongation factor 4 [Legionella fairfieldensis]	elongation factor 4 [Legionella lansingensis]	elongation factor 4 [Legionella shakespearei]	elongation factor 4 [Legionella wadsworthii]	GTP-binding protein LepA [Legionella pneumophila subsp. pneumophila str. Philadelphia 1]	elongation factor 4 [Legionella drancourtii]	elongation factor 4 [Legionella anisa]	elongation factor 4 [Legionella cherrii]	elongation factor 4 [Legionella moravica]	elongation factor 4 [Legionella longbeachae]	elongation factor 4 [Legionella sainthelensi]
WP_025385278.1	lpari_01703	WP_028387380.1	WP_035890023.1	WP_028388715.1	WP_028372739.1	WP_018575870.1	WP_031565292.1	YP_095893.1	WP_006871604.1	WP_019232019.1	WP_028380255.1	WP_028383115.1	WP_003631996.1	WP_027270217.1	lytic transglycosylase [Legionella oakridgensis]	Membrane-bound lytic murein transglycosylase B	lytic transglycosylase [Legionella geestiana]	lytic transglycosylase [Legionella norrlandica]	lytic transglycosylase [Legionella fairfieldensis]	lytic transglycosylase [Legionella lansingensis]	lytic transglycosylase [Legionella shakespearei]	lytic transglycosylase [Legionella wadsworthii]	membrane bound lytic murein transglycosylase [Legionella pneumophila subsp. pneumophila str. Philadelphia 1]	lytic transglycosylase [Legionella drancourtii]	lytic transglycosylase [Legionella anisa]	lytic transglycosylase [Legionella cherrii]	lytic transglycosylase [Legionella moravica]	lytic transglycosylase [Legionella longbeachae]	lytic transglycosylase [Legionella sainthelensi]
WP_025385279.1	lpari_01701	WP_028387382.1	WP_035890009.1	WP_028388717.1	WP_028372737.1	WP_018575868.1	WP_031565288.1	YP_095895.1	WP_006871602.1	WP_019232017.1	WP_028380253.1	WP_028383117.1	WP_003631998.1	WP_027270219.1	general secretion pathway protein GspM [Legionella oakridgensis]	hypothetical protein	hypothetical protein [Legionella geestiana]	general secretion pathway protein GspM [Legionella norrlandica]	general secretion pathway protein GspM [Legionella fairfieldensis]	general secretion pathway protein GspM [Legionella lansingensis]	hypothetical protein [Legionella shakespearei]	general secretion pathway protein GspM [Legionella wadsworthii]	general secretion pathway protein M-type YghD [Legionella pneumophila subsp. pneumophila str. Philadelphia 1]	general secretion pathway protein GspM [Legionella drancourtii]	general secretion pathway protein GspM [Legionella anisa]	general secretion pathway protein GspM [Legionella cherrii]	general secretion pathway protein GspM [Legionella moravica]	general secretion pathway protein GspM [Legionella longbeachae]	general secretion pathway protein GspM [Legionella sainthelensi]
WP_025385280.1	lpari_01700	WP_051551065.1	WP_035890002.1	WP_028388718.1	WP_028372736.1	WP_018575867.1	WP_031565287.1	YP_095896.1	WP_040535620.1	WP_019232015.1	WP_028380251.1	WP_028383118.1	WP_003632000.1	WP_027270220.1	hypothetical protein [Legionella oakridgensis]	hypothetical protein	hypothetical protein [Legionella geestiana]	hypothetical protein [Legionella norrlandica]	hypothetical protein [Legionella fairfieldensis]	hypothetical protein [Legionella lansingensis]	hypothetical protein [Legionella shakespearei]	hypothetical protein [Legionella wadsworthii]	hypothetical protein lpg1876 [Legionella pneumophila subsp. pneumophila str. Philadelphia 1]	hypothetical protein [Legionella drancourtii]	hypothetical protein [Legionella anisa]	hypothetical protein [Legionella cherrii]	hypothetical protein [Legionella moravica]	hypothetical protein [Legionella longbeachae]	hypothetical protein [Legionella sainthelensi]
WP_025385283.1	lpari_01699	WP_028387386.1	WP_035889998.1	WP_028388719.1	WP_028372735.1	WP_018575866.1	WP_031565285.1	YP_095897.1	WP_006871599.1	WP_040521878.1	WP_028380250.1	WP_028383119.1	WP_003632002.1	WP_027270221.1	deoxyguanosinetriphosphate triphosphohydrolase [Legionella oakridgensis]	Deoxyguanosinetriphosphate triphosphohydrolase-like protein	deoxyguanosinetriphosphate triphosphohydrolase [Legionella geestiana]	deoxyguanosinetriphosphate triphosphohydrolase [Legionella norrlandica]	deoxyguanosinetriphosphate triphosphohydrolase [Legionella fairfieldensis]	deoxyguanosinetriphosphate triphosphohydrolase [Legionella lansingensis]	deoxyguanosinetriphosphate triphosphohydrolase [Legionella shakespearei]	deoxyguanosinetriphosphate triphosphohydrolase [Legionella wadsworthii]	deoxyguanosinetriphosphate triphosphohydrolase-like protein [Legionella pneumophila subsp. pneumophila str. Philadelphia 1]	deoxyguanosinetriphosphate triphosphohydrolase [Legionella drancourtii]	deoxyguanosinetriphosphate triphosphohydrolase [Legionella anisa]	deoxyguanosinetriphosphate triphosphohydrolase [Legionella cherrii]	deoxyguanosinetriphosphate triphosphohydrolase [Legionella moravica]	deoxyguanosinetriphosphate triphosphohydrolase [Legionella longbeachae]	deoxyguanosinetriphosphate triphosphohydrolase [Legionella sainthelensi]
WP_025385288.1	lpari_01677	WP_028386815.1	WP_035889816.1	WP_028388340.1	WP_028372207.1	WP_018577190.1	WP_031563761.1	YP_096338.1	WP_006870581.1	WP_019234748.1	WP_028381206.1	WP_028384326.1	WP_003632964.1	WP_027270759.1	exodeoxyribonuclease VII small subunit [Legionella oakridgensis]	Exodeoxyribonuclease 7 small subunit	exodeoxyribonuclease VII small subunit [Legionella geestiana]	exodeoxyribonuclease VII small subunit [Legionella norrlandica]	exodeoxyribonuclease VII small subunit [Legionella fairfieldensis]	exodeoxyribonuclease VII small subunit [Legionella lansingensis]	exodeoxyribonuclease VII small subunit [Legionella shakespearei]	exodeoxyribonuclease VII small subunit [Legionella wadsworthii]	exodeoxyribonuclease VII small subunit [Legionella pneumophila subsp. pneumophila str. Philadelphia 1]	exodeoxyribonuclease VII small subunit [Legionella drancourtii]	exodeoxyribonuclease VII small subunit [Legionella anisa]	exodeoxyribonuclease VII small subunit [Legionella cherrii]	exodeoxyribonuclease VII small subunit [Legionella moravica]	exodeoxyribonuclease VII small subunit [Legionella longbeachae]	exodeoxyribonuclease VII small subunit [Legionella sainthelensi]
WP_025385290.1	lpari_01676	WP_028386817.1	WP_052117618.1	WP_028388341.1	WP_028372209.1	WP_026253933.1	WP_031563762.1	YP_096335.1	WP_006870582.1	WP_019234749.1	WP_028381205.1	WP_028384328.1	WP_003632963.1	WP_027270760.1	DNA repair protein RadA [Legionella oakridgensis]	hypothetical protein	DNA repair protein RadA [Legionella geestiana]	DNA repair protein RadA [Legionella norrlandica]	DNA repair protein RadA [Legionella fairfieldensis]	DNA repair protein RadA [Legionella lansingensis]	DNA repair protein RadA [Legionella shakespearei]	DNA repair protein RadA [Legionella wadsworthii]	DNA repair protein RadA [Legionella pneumophila subsp. pneumophila str. Philadelphia 1]	DNA repair protein RadA [Legionella drancourtii]	DNA repair protein RadA [Legionella anisa]	DNA repair protein RadA [Legionella cherrii]	DNA repair protein RadA [Legionella moravica]	DNA repair protein RadA [Legionella longbeachae]	DNA repair protein RadA [Legionella sainthelensi]
WP_025385291.1	lpari_03724	WP_028386925.1	WP_035888040.1	WP_028387799.1	WP_028373942.1	WP_026253814.1	WP_031567374.1	YP_095834.1	WP_006870227.1	WP_019233230.1	WP_028381972.1	WP_028383032.1	WP_003632212.1	WP_027271404.1	delta-aminolevulinic acid dehydratase [Legionella oakridgensis]	Delta-aminolevulinic acid dehydratase	delta-aminolevulinic acid dehydratase [Legionella geestiana]	delta-aminolevulinic acid dehydratase [Legionella norrlandica]	delta-aminolevulinic acid dehydratase [Legionella fairfieldensis]	delta-aminolevulinic acid dehydratase [Legionella lansingensis]	delta-aminolevulinic acid dehydratase [Legionella shakespearei]	delta-aminolevulinic acid dehydratase [Legionella wadsworthii]	delta-aminolevulinic acid dehydratase [Legionella pneumophila subsp. pneumophila str. Philadelphia 1]	delta-aminolevulinic acid dehydratase [Legionella drancourtii]	delta-aminolevulinic acid dehydratase [Legionella anisa]	delta-aminolevulinic acid dehydratase [Legionella cherrii]	delta-aminolevulinic acid dehydratase [Legionella moravica]	delta-aminolevulinic acid dehydratase [Legionella longbeachae]	delta-aminolevulinic acid dehydratase [Legionella sainthelensi]
WP_025385299.1	lpari_00368	WP_028386813.1	WP_035890736.1	WP_028388334.1	WP_028372196.1	WP_018578076.1	WP_031563737.1	YP_096654.2	WP_006872486.1	WP_040522560.1	WP_028381049.1	WP_028383135.1	WP_003635431.1	WP_027272051.1	GTPase CgtA [Legionella oakridgensis]	GTPase Obg	GTPase CgtA [Legionella geestiana]	GTPase CgtA [Legionella norrlandica]	GTPase CgtA [Legionella fairfieldensis]	GTPase CgtA [Legionella lansingensis]	GTPase CgtA [Legionella shakespearei]	GTPase CgtA [Legionella wadsworthii]	GTPase ObgE [Legionella pneumophila subsp. pneumophila str. Philadelphia 1]	GTPase CgtA [Legionella drancourtii]	GTPase CgtA [Legionella anisa]	GTPase CgtA [Legionella cherrii]	GTPase CgtA [Legionella moravica]	GTPase CgtA [Legionella longbeachae]	GTPase CgtA [Legionella sainthelensi]
WP_025385300.1	lpari_00369	WP_028386812.1	WP_035890738.1	WP_028388333.1	WP_028372195.1	WP_018578075.1	WP_031563735.1	YP_096655.1	WP_006872485.1	WP_019233611.1	WP_028381048.1	WP_028383134.1	WP_003635429.1	WP_027272052.1	50S ribosomal protein L27 [Legionella oakridgensis]	50S ribosomal protein L27	50S ribosomal protein L27 [Legionella geestiana]	50S ribosomal protein L27 [Legionella norrlandica]	50S ribosomal protein L27 [Legionella fairfieldensis]	50S ribosomal protein L27 [Legionella lansingensis]	50S ribosomal protein L27 [Legionella shakespearei]	50S ribosomal protein L27 [Legionella wadsworthii]	50S ribosomal protein L27 [Legionella pneumophila subsp. pneumophila str. Philadelphia 1]	50S ribosomal protein L27 [Legionella drancourtii]	50S ribosomal protein L27 [Legionella anisa]	50S ribosomal protein L27 [Legionella cherrii]	50S ribosomal protein L27 [Legionella moravica]	50S ribosomal protein L27 [Legionella longbeachae]	50S ribosomal protein L27 [Legionella sainthelensi]
WP_025385302.1	lpari_00371	WP_028386810.1	WP_035890741.1	WP_028388331.1	WP_028372193.1	WP_018578073.1	WP_031563733.1	YP_096657.1	WP_006872482.1	WP_019233609.1	WP_028381046.1	WP_028383132.1	WP_003635425.1	WP_027272053.1	50S ribosomal protein L25 [Legionella oakridgensis]	50S ribosomal protein L25	50S ribosomal protein L25 [Legionella geestiana]	50S ribosomal protein L25 [Legionella norrlandica]	50S ribosomal protein L25 [Legionella fairfieldensis]	50S ribosomal protein L25 [Legionella lansingensis]	50S ribosomal protein L25 [Legionella shakespearei]	50S ribosomal protein L25 [Legionella wadsworthii]	50S ribosomal protein L25 [Legionella pneumophila subsp. pneumophila str. Philadelphia 1]	50S ribosomal protein L25 [Legionella drancourtii]	50S ribosomal protein L25 [Legionella anisa]	50S ribosomal protein L25 [Legionella cherrii]	50S ribosomal protein L25 [Legionella moravica]	50S ribosomal protein L25 [Legionella longbeachae]	50S ribosomal protein L25 [Legionella sainthelensi]
WP_025385303.1	lpari_00374	WP_028386808.1	WP_035890743.1	WP_028388329.1	WP_028372191.1	WP_018578071.1	WP_031563731.1	YP_096659.1	WP_040536260.1	WP_019233607.1	WP_028381044.1	WP_028383130.1	WP_003635422.1	WP_027272055.1	GTP-binding protein [Legionella oakridgensis]	Ribosome-binding ATPase YchF	GTP-binding protein [Legionella geestiana]	GTP-binding protein, partial [Legionella norrlandica]	GTP-binding protein [Legionella fairfieldensis]	GTP-binding protein [Legionella lansingensis]	GTP-binding protein [Legionella shakespearei]	GTP-binding protein [Legionella wadsworthii]	GTP-dependent nucleic acid-binding protein EngD [Legionella pneumophila subsp. pneumophila str. Philadelphia 1]	GTP-binding protein [Legionella drancourtii]	GTP-binding protein [Legionella anisa]	GTP-binding protein [Legionella cherrii]	GTP-binding protein [Legionella moravica]	GTP-binding protein [Legionella longbeachae]	GTP-binding protein [Legionella sainthelensi]
WP_025385306.1	lpari_00722	WP_028386326.1	WP_035890604.1	WP_028387713.1	WP_028373430.1	WP_018577715.1	WP_031567983.1	YP_094730.2	WP_006869338.1	WP_019233787.1	WP_028382265.1	WP_028384769.1	WP_003632560.1	WP_027271025.1	prolyl-tRNA synthetase [Legionella oakridgensis]	Proline--tRNA ligase	prolyl-tRNA synthetase [Legionella geestiana]	prolyl-tRNA synthetase [Legionella norrlandica]	prolyl-tRNA synthetase [Legionella fairfieldensis]	prolyl-tRNA synthetase [Legionella lansingensis]	prolyl-tRNA synthetase [Legionella shakespearei]	prolyl-tRNA synthetase [Legionella wadsworthii]	prolyl-tRNA synthetase [Legionella pneumophila subsp. pneumophila str. Philadelphia 1]	prolyl-tRNA synthetase [Legionella drancourtii]	prolyl-tRNA synthetase [Legionella anisa]	prolyl-tRNA synthetase [Legionella cherrii]	prolyl-tRNA synthetase [Legionella moravica]	prolyl-tRNA synthetase [Legionella longbeachae]	prolyl-tRNA synthetase [Legionella sainthelensi]
WP_025385308.1	lpari_00719	WP_035902135.1	WP_035890608.1	WP_028387716.1	WP_051546166.1	WP_018577719.1	WP_031567976.1	YP_094735.1	WP_040535036.1	WP_019233784.1	WP_028382262.1	WP_028384763.1	WP_012978890.1	WP_027271022.1	membrane protein [Legionella oakridgensis]	Outer membrane protein TolC	membrane protein [Legionella geestiana]	membrane protein [Legionella norrlandica]	membrane protein [Legionella fairfieldensis]	hypothetical protein [Legionella lansingensis]	membrane protein [Legionella shakespearei]	membrane protein [Legionella wadsworthii]	outer membrane protein TolC [Legionella pneumophila subsp. pneumophila str. Philadelphia 1]	membrane protein [Legionella drancourtii]	membrane protein [Legionella anisa]	membrane protein [Legionella cherrii]	membrane protein [Legionella moravica]	membrane protein [Legionella longbeachae]	membrane protein [Legionella sainthelensi]
WP_025385309.1	lpari_00718	WP_035902108.1	WP_035890609.1	WP_028387717.1	WP_028373434.1	WP_018577720.1	WP_031567974.1	YP_094736.1	WP_006870850.1	WP_040522604.1	WP_028382261.1	WP_028384762.1	WP_003632556.1	WP_027271021.1	protein-L-isoaspartate O-methyltransferase [Legionella oakridgensis]	Protein-L-isoaspartate O-methyltransferase	protein-L-isoaspartate O-methyltransferase [Legionella geestiana]	protein-L-isoaspartate O-methyltransferase [Legionella norrlandica]	protein-L-isoaspartate O-methyltransferase [Legionella fairfieldensis]	protein-L-isoaspartate O-methyltransferase [Legionella lansingensis]	protein-L-isoaspartate O-methyltransferase [Legionella shakespearei]	protein-L-isoaspartate O-methyltransferase [Legionella wadsworthii]	protein-L-isoaspartate-O-methyltransferase [Legionella pneumophila subsp. pneumophila str. Philadelphia 1]	protein-L-isoaspartate O-methyltransferase [Legionella drancourtii]	protein-L-isoaspartate O-methyltransferase [Legionella anisa]	protein-L-isoaspartate O-methyltransferase [Legionella cherrii]	protein-L-isoaspartate O-methyltransferase [Legionella moravica]	protein-L-isoaspartate O-methyltransferase [Legionella longbeachae]	protein-L-isoaspartate O-methyltransferase [Legionella sainthelensi]
WP_025385310.1	lpari_00715	WP_028386320.1	WP_035890611.1	WP_028387720.1	WP_028373437.1	WP_018577723.1	WP_031567969.1	YP_094739.1	WP_006870853.1	WP_019233780.1	WP_028382257.1	WP_028384759.1	WP_012978891.1	WP_027271018.1	ABC transporter ATP-binding protein [Legionella oakridgensis]	Energy-dependent translational throttle protein EttA	ABC transporter ATP-binding protein [Legionella geestiana]	ABC transporter ATP-binding protein [Legionella norrlandica]	ABC transporter ATP-binding protein [Legionella fairfieldensis]	ABC transporter ATP-binding protein [Legionella lansingensis]	heme ABC transporter ATP-binding protein [Legionella shakespearei]	ABC transporter ATP-binding protein [Legionella wadsworthii]	ABC transporter ATP-binding protein [Legionella pneumophila subsp. pneumophila str. Philadelphia 1]	heme ABC transporter ATP-binding protein [Legionella drancourtii]	heme ABC transporter ATP-binding protein [Legionella anisa]	ABC transporter ATP-binding protein [Legionella cherrii]	ABC transporter ATP-binding protein [Legionella moravica]	heme ABC transporter ATP-binding protein [Legionella longbeachae]	ABC transporter ATP-binding protein [Legionella sainthelensi]
WP_025385311.1	lpari_00714	WP_028386319.1	WP_035890612.1	WP_028387721.1	WP_028373438.1	WP_018577724.1	WP_031567967.1	YP_094740.1	WP_006870854.1	WP_019233779.1	WP_028382256.1	WP_028384758.1	WP_003632550.1	WP_027271017.1	enhanced entry protein EnhA [Legionella oakridgensis]	hypothetical protein	enhanced entry protein EnhA [Legionella geestiana]	enhanced entry protein EnhA [Legionella norrlandica]	enhanced entry protein EnhA [Legionella fairfieldensis]	enhanced entry protein EnhA [Legionella lansingensis]	enhanced entry protein EnhA [Legionella shakespearei]	enhanced entry protein EnhA [Legionella wadsworthii]	enhanced entry protein EnhA [Legionella pneumophila subsp. pneumophila str. Philadelphia 1]	hypothetical protein [Legionella drancourtii]	enhanced entry protein EnhA [Legionella anisa]	enhanced entry protein EnhA [Legionella cherrii]	enhanced entry protein EnhA [Legionella moravica]	enhanced entry protein EnhA [Legionella longbeachae]	enhanced entry protein EnhA [Legionella sainthelensi]
WP_025385313.1	lpari_00712	WP_028386317.1	WP_035890616.1	WP_028387725.1	WP_028373869.1	WP_018577728.1	WP_031567964.1	YP_094745.1	WP_006870865.1	WP_019233777.1	WP_028382254.1	WP_028384756.1	WP_003632548.1	WP_027271015.1	formimidoylglutamase [Legionella oakridgensis]	Formimidoylglutamase	formimidoylglutamase [Legionella geestiana]	formimidoylglutamase [Legionella norrlandica]	formimidoylglutamase [Legionella fairfieldensis]	formimidoylglutamase [Legionella lansingensis]	formimidoylglutamase [Legionella shakespearei]	formimidoylglutamase [Legionella wadsworthii]	formimidoylglutamase [Legionella pneumophila subsp. pneumophila str. Philadelphia 1]	formimidoylglutamase [Legionella drancourtii]	formimidoylglutamase [Legionella anisa]	formimidoylglutamase [Legionella cherrii]	formimidoylglutamase [Legionella moravica]	formimidoylglutamase [Legionella longbeachae]	formimidoylglutamase [Legionella sainthelensi]
WP_025385320.1	lpari_00709	WP_051550887.1	WP_035890617.1	WP_028387726.1	WP_028373870.1	WP_018577662.1	WP_031567962.1	YP_094746.1	WP_006870866.1	WP_019233774.1	WP_028382250.1	WP_028384755.1	WP_012978893.1	WP_027271014.1	sepiapterin reductase [Legionella oakridgensis]	Benzil reductase ((S)-benzoin forming)	sepiapterin reductase [Legionella geestiana]	sepiapterin reductase [Legionella norrlandica]	sepiapterin reductase [Legionella fairfieldensis]	sepiapterin reductase [Legionella lansingensis]	hypothetical protein [Legionella shakespearei]	sepiapterin reductase [Legionella wadsworthii]	sepiapterin reductase [Legionella pneumophila subsp. pneumophila str. Philadelphia 1]	hypothetical protein [Legionella drancourtii]	sepiapterin reductase [Legionella anisa]	sepiapterin reductase [Legionella cherrii]	sepiapterin reductase [Legionella moravica]	sepiapterin reductase [Legionella longbeachae]	sepiapterin reductase [Legionella sainthelensi]
WP_025385321.1	lpari_00708	WP_028386315.1	WP_035890618.1	WP_028387727.1	WP_028373871.1	WP_018577661.1	WP_031567960.1	YP_094747.1	WP_006870867.1	WP_019233773.1	WP_028382249.1	WP_028384754.1	WP_003632546.1	WP_027271013.1	imidazolonepropionase [Legionella oakridgensis]	Imidazolonepropionase	imidazolonepropionase [Legionella geestiana]	imidazolonepropionase [Legionella norrlandica]	imidazolonepropionase [Legionella fairfieldensis]	imidazolonepropionase [Legionella lansingensis]	imidazolonepropionase [Legionella shakespearei]	imidazolonepropionase [Legionella wadsworthii]	imidazolonepropionase [Legionella pneumophila subsp. pneumophila str. Philadelphia 1]	imidazolonepropionase [Legionella drancourtii]	imidazolonepropionase [Legionella anisa]	imidazolonepropionase [Legionella cherrii]	imidazolonepropionase [Legionella moravica]	imidazolonepropionase [Legionella longbeachae]	imidazolonepropionase [Legionella sainthelensi]
WP_025385324.1	lpari_02799	WP_051550883.1	WP_035888859.1	WP_028387754.1	WP_028373880.1	WP_018577651.1	WP_031567946.1	YP_094758.1	WP_040535054.1	WP_019233765.1	WP_028382243.1	WP_028384742.1	WP_003632539.1	WP_027271006.1	hypothetical protein [Legionella oakridgensis]	hypothetical protein	hypothetical protein [Legionella geestiana]	hypothetical protein [Legionella norrlandica]	hypothetical protein [Legionella fairfieldensis]	hypothetical protein [Legionella lansingensis]	hypothetical protein [Legionella shakespearei]	hypothetical protein [Legionella wadsworthii]	hypothetical protein lpg0722 [Legionella pneumophila subsp. pneumophila str. Philadelphia 1]	hypothetical protein [Legionella drancourtii]	hypothetical protein [Legionella anisa]	hypothetical protein [Legionella cherrii]	hypothetical protein [Legionella moravica]	hypothetical protein [Legionella longbeachae]	hypothetical protein [Legionella sainthelensi]
WP_025385326.1	lpari_02796	WP_028386306.1	WP_035888863.1	WP_028387756.1	WP_028373883.1	WP_018577648.1	WP_031567940.1	YP_094761.1	WP_006870880.1	WP_019233762.1	WP_028382240.1	WP_028384740.1	WP_012978896.1	WP_027271003.1	serine hydroxymethyltransferase [Legionella oakridgensis]	Serine hydroxymethyltransferase 2	serine hydroxymethyltransferase [Legionella geestiana]	serine hydroxymethyltransferase [Legionella norrlandica]	serine hydroxymethyltransferase [Legionella fairfieldensis]	serine hydroxymethyltransferase [Legionella lansingensis]	serine hydroxymethyltransferase [Legionella shakespearei]	serine hydroxymethyltransferase [Legionella wadsworthii]	serine hydroxymethyltransferase [Legionella pneumophila subsp. pneumophila str. Philadelphia 1]	serine hydroxymethyltransferase [Legionella drancourtii]	serine hydroxymethyltransferase [Legionella anisa]	serine hydroxymethyltransferase [Legionella cherrii]	serine hydroxymethyltransferase [Legionella moravica]	serine hydroxymethyltransferase [Legionella longbeachae]	serine hydroxymethyltransferase [Legionella sainthelensi]
WP_025385327.1	lpari_02795	WP_028386305.1	WP_035888865.1	WP_028387757.1	WP_028373884.1	WP_018577647.1	WP_031567939.1	YP_094762.1	WP_006870881.1	WP_019233761.1	WP_028382239.1	WP_028384739.1	WP_003632535.1	WP_027271002.1	NrdR family transcriptional regulator [Legionella oakridgensis]	Transcriptional repressor NrdR	NrdR family transcriptional regulator [Legionella geestiana]	NrdR family transcriptional regulator [Legionella norrlandica]	NrdR family transcriptional regulator [Legionella fairfieldensis]	NrdR family transcriptional regulator [Legionella lansingensis]	NrdR family transcriptional regulator [Legionella shakespearei]	NrdR family transcriptional regulator [Legionella wadsworthii]	transcriptional regulator NrdR [Legionella pneumophila subsp. pneumophila str. Philadelphia 1]	NrdR family transcriptional regulator [Legionella drancourtii]	NrdR family transcriptional regulator [Legionella anisa]	NrdR family transcriptional regulator [Legionella cherrii]	NrdR family transcriptional regulator [Legionella moravica]	NrdR family transcriptional regulator [Legionella longbeachae]	NrdR family transcriptional regulator [Legionella sainthelensi]
WP_025385328.1	lpari_02794	WP_028386304.1	WP_035888867.1	WP_028387758.1	WP_028373885.1	WP_018577646.1	WP_031567937.1	YP_094763.1	WP_006870882.1	WP_019233760.1	WP_028382237.1	WP_028384738.1	WP_003632534.1	WP_027271001.1	antitermination protein NusB [Legionella oakridgensis]	hypothetical protein	antitermination protein NusB [Legionella geestiana]	antitermination protein NusB [Legionella norrlandica]	antitermination protein NusB [Legionella fairfieldensis]	antitermination protein NusB [Legionella lansingensis]	transcription antitermination protein NusB [Legionella shakespearei]	antitermination protein NusB [Legionella wadsworthii]	transcription termination factor NusB [Legionella pneumophila subsp. pneumophila str. Philadelphia 1]	transcription antitermination protein NusB [Legionella drancourtii]	transcription antitermination protein NusB [Legionella anisa]	antitermination protein NusB [Legionella cherrii]	antitermination protein NusB [Legionella moravica]	transcription antitermination protein NusB [Legionella longbeachae]	antitermination protein NusB [Legionella sainthelensi]
WP_025385329.1	lpari_02793	WP_028386303.1	WP_035888869.1	WP_035917913.1	WP_028373886.1	WP_018575756.1	WP_031567935.1	YP_094764.1	WP_040535063.1	WP_019233759.1	WP_028382236.1	WP_028384737.1	WP_003632533.1	WP_027271000.1	thiamine monophosphate kinase [Legionella oakridgensis]	Thiamine-monophosphate kinase	hypothetical protein [Legionella geestiana]	thiamine monophosphate kinase [Legionella norrlandica]	thiamine monophosphate kinase [Legionella fairfieldensis]	thiamine monophosphate kinase [Legionella lansingensis]	hypothetical protein [Legionella shakespearei]	thiamine monophosphate kinase [Legionella wadsworthii]	thiamine monophosphate kinase [Legionella pneumophila subsp. pneumophila str. Philadelphia 1]	thiamine monophosphate kinase [Legionella drancourtii]	thiamine monophosphate kinase [Legionella anisa]	thiamine monophosphate kinase [Legionella cherrii]	thiamine monophosphate kinase [Legionella moravica]	thiamine monophosphate kinase [Legionella longbeachae]	thiamine monophosphate kinase [Legionella sainthelensi]
WP_025385332.1	lpari_02792	WP_028386302.1	WP_035888871.1	WP_028387760.1	WP_028373887.1	WP_018577645.1	WP_031567934.1	YP_094765.1	WP_040535066.1	WP_019233758.1	WP_028382235.1	WP_028384736.1	WP_003632531.1	WP_027270999.1	phosphatidylglycerophosphatase [Legionella oakridgensis]	Phosphatidylglycerophosphatase A	phosphatidylglycerophosphatase [Legionella geestiana]	phosphatidylglycerophosphatase [Legionella norrlandica]	phosphatidylglycerophosphatase [Legionella fairfieldensis]	phosphatidylglycerophosphatase [Legionella lansingensis]	phosphatidylglycerophosphatase [Legionella shakespearei]	phosphatidylglycerophosphatase [Legionella wadsworthii]	phosphatidylglycerophosphatase A [Legionella pneumophila subsp. pneumophila str. Philadelphia 1]	phosphatidylglycerophosphatase, partial [Legionella drancourtii]	phosphatidylglycerophosphatase [Legionella anisa]	phosphatidylglycerophosphatase [Legionella cherrii]	phosphatidylglycerophosphatase [Legionella moravica]	phosphatidylglycerophosphatase A [Legionella longbeachae]	phosphatidylglycerophosphatase [Legionella sainthelensi]
WP_025385337.1	lpari_00802	WP_028386295.1	WP_035890698.1	WP_028387770.1	WP_028374075.1	WP_018578032.1	WP_031563818.1	YP_094722.1	WP_006870684.1	WP_019234808.1	WP_028381155.1	WP_028384779.1	WP_003632900.1	WP_027270804.1	thiol:disulfide interchange protein [Legionella oakridgensis]	Thiol:disulfide interchange protein DsbD	thiol:disulfide interchange protein [Legionella geestiana]	thiol:disulfide interchange protein [Legionella norrlandica]	thiol:disulfide interchange protein [Legionella fairfieldensis]	thiol:disulfide interchange protein [Legionella lansingensis]	hypothetical protein [Legionella shakespearei]	thiol:disulfide interchange protein [Legionella wadsworthii]	hypothetical protein lpg0686 [Legionella pneumophila subsp. pneumophila str. Philadelphia 1]	thiol:disulfide interchange protein [Legionella drancourtii]	thiol:disulfide interchange protein [Legionella anisa]	thiol:disulfide interchange protein [Legionella cherrii]	thiol:disulfide interchange protein [Legionella moravica]	thiol:disulfide interchange protein [Legionella longbeachae]	thiol:disulfide interchange protein [Legionella sainthelensi]
WP_025385338.1	lpari_00803	WP_028386294.1	WP_035890699.1	WP_028387771.1	WP_028374074.1	WP_018578031.1	WP_031563819.1	YP_094723.1	WP_006870686.1	WP_019234809.1	WP_028381154.1	WP_028384778.1	WP_003632899.1	WP_027270805.1	molecular chaperone GroES [Legionella oakridgensis]	10 kDa chaperonin	molecular chaperone GroES [Legionella geestiana]	molecular chaperone GroES [Legionella norrlandica]	molecular chaperone GroES [Legionella fairfieldensis]	molecular chaperone GroES [Legionella lansingensis]	molecular chaperone GroES [Legionella shakespearei]	molecular chaperone GroES [Legionella wadsworthii]	co-chaperonin GroES [Legionella pneumophila subsp. pneumophila str. Philadelphia 1]	molecular chaperone GroES [Legionella drancourtii]	molecular chaperone GroES [Legionella anisa]	molecular chaperone GroES [Legionella cherrii]	molecular chaperone GroES [Legionella moravica]	MULTISPECIES: molecular chaperone GroES [Legionellaceae]	molecular chaperone GroES [Legionella sainthelensi]
WP_025385339.1	lpari_00804	WP_028386293.1	WP_035890700.1	WP_028387772.1	WP_028374073.1	WP_018578030.1	WP_031563820.1	YP_094724.1	WP_006870687.1	WP_019234810.1	WP_028381153.1	WP_028384777.1	WP_003632898.1	WP_027270806.1	molecular chaperone GroEL [Legionella oakridgensis]	60 kDa chaperonin	molecular chaperone GroEL [Legionella geestiana]	molecular chaperone GroEL [Legionella norrlandica]	molecular chaperone GroEL [Legionella fairfieldensis]	molecular chaperone GroEL [Legionella lansingensis]	molecular chaperone GroEL [Legionella shakespearei]	molecular chaperone GroEL [Legionella wadsworthii]	molecular chaperone GroEL [Legionella pneumophila subsp. pneumophila str. Philadelphia 1]	molecular chaperone GroEL [Legionella drancourtii]	hypothetical protein [Legionella anisa]	molecular chaperone GroEL [Legionella cherrii]	molecular chaperone GroEL [Legionella moravica]	molecular chaperone GroEL [Legionella longbeachae]	molecular chaperone GroEL [Legionella sainthelensi]
WP_025385347.1	lpari_01595	WP_028385770.1	WP_035891365.1	WP_028387790.1	WP_028374064.1	WP_018578045.1	WP_031564099.1	YP_094727.1	WP_006870527.1	WP_019233840.1	WP_028382307.1	WP_028384774.1	WP_003632612.1	WP_027271060.1	DNA topoisomerase IV subunit B [Legionella oakridgensis]	DNA topoisomerase 4 subunit B	DNA topoisomerase IV subunit B [Legionella geestiana]	DNA topoisomerase IV subunit B [Legionella norrlandica]	DNA topoisomerase IV subunit B [Legionella fairfieldensis]	DNA topoisomerase IV subunit B [Legionella lansingensis]	DNA topoisomerase IV subunit B [Legionella shakespearei]	DNA topoisomerase IV subunit B [Legionella wadsworthii]	DNA topoisomerase IV subunit B [Legionella pneumophila subsp. pneumophila str. Philadelphia 1]	DNA topoisomerase IV subunit B [Legionella drancourtii]	DNA topoisomerase IV subunit B [Legionella anisa]	DNA topoisomerase IV subunit B [Legionella cherrii]	DNA topoisomerase IV subunit B [Legionella moravica]	DNA topoisomerase IV subunit B [Legionella longbeachae]	DNA topoisomerase IV subunit B [Legionella sainthelensi]
WP_025385348.1	lpari_03730	WP_028386921.1	WP_035888587.1	WP_028387792.1	WP_028374063.1	WP_018575930.1	WP_031567384.1	YP_095839.1	WP_006870236.1	WP_019233235.1	WP_028381977.1	WP_028383058.1	WP_003632218.1	WP_027271399.1	ATPase [Legionella oakridgensis]	Flagellum site-determining protein YlxH	ATPase [Legionella geestiana]	ATPase [Legionella norrlandica]	ATPase [Legionella fairfieldensis]	ATPase [Legionella lansingensis]	ATPase [Legionella shakespearei]	ATPase [Legionella wadsworthii]	ATPase (Mrp) [Legionella pneumophila subsp. pneumophila str. Philadelphia 1]	ATPase [Legionella drancourtii]	ATPase [Legionella anisa]	ATPase [Legionella cherrii]	ATPase [Legionella moravica]	ATPase [Legionella longbeachae]	ATPase [Legionella sainthelensi]
WP_025385353.1	lpari_03726	WP_028386924.1	WP_035888042.1	WP_028387796.1	WP_028373940.1	WP_018575933.1	WP_031567378.1	YP_095836.1	WP_006870232.1	WP_040522344.1	WP_028381974.1	WP_035921222.1	WP_012978985.1	WP_027271402.1	long-chain fatty acid transporter [Legionella oakridgensis]	47 kDa outer membrane protein	long-chain fatty acid transporter [Legionella geestiana]	long-chain fatty acid transporter [Legionella norrlandica]	long-chain fatty acid transporter [Legionella fairfieldensis]	long-chain fatty acid transporter [Legionella lansingensis]	hypothetical protein [Legionella shakespearei]	long-chain fatty acid transporter [Legionella wadsworthii]	hypothetical protein lpg1810 [Legionella pneumophila subsp. pneumophila str. Philadelphia 1]	long-chain fatty acid transporter [Legionella drancourtii]	long-chain fatty acid transporter [Legionella anisa]	long-chain fatty acid transporter [Legionella cherrii]	long-chain fatty acid transporter [Legionella moravica]	long-chain fatty acid transporter [Legionella longbeachae]	long-chain fatty acid transporter [Legionella sainthelensi]
WP_025385355.1	lpari_02684	WP_028386904.1	WP_035888938.1	WP_028388708.1	WP_028372754.1	WP_018576266.1	WP_031567744.1	YP_096020.1	WP_006870328.1	WP_019233662.1	WP_028382142.1	WP_028385300.1	WP_003632431.1	WP_027270631.1	S-adenosylmethionine:tRNA ribosyltransferase-isomerase [Legionella oakridgensis]	S-adenosylmethionine:tRNA ribosyltransferase-isomerase	S-adenosylmethionine:tRNA ribosyltransferase-isomerase [Legionella geestiana]	S-adenosylmethionine:tRNA ribosyltransferase-isomerase [Legionella norrlandica]	S-adenosylmethionine:tRNA ribosyltransferase-isomerase [Legionella fairfieldensis]	S-adenosylmethionine:tRNA ribosyltransferase-isomerase [Legionella lansingensis]	S-adenosylmethionine:tRNA ribosyltransferase-isomerase [Legionella shakespearei]	S-adenosylmethionine:tRNA ribosyltransferase-isomerase [Legionella wadsworthii]	S-adenosylmethionine--tRNA ribosyltransferase-isomerase [Legionella pneumophila subsp. pneumophila str. Philadelphia 1]	S-adenosylmethionine:tRNA ribosyltransferase-isomerase [Legionella drancourtii]	S-adenosylmethionine:tRNA ribosyltransferase-isomerase [Legionella anisa]	S-adenosylmethionine:tRNA ribosyltransferase-isomerase [Legionella cherrii]	S-adenosylmethionine:tRNA ribosyltransferase-isomerase [Legionella moravica]	S-adenosylmethionine:tRNA ribosyltransferase-isomerase [Legionella longbeachae]	S-adenosylmethionine:tRNA ribosyltransferase-isomerase [Legionella sainthelensi]
WP_025385358.1	lpari_02674	WP_028386700.1	WP_035888932.1	WP_028388705.1	WP_028374088.1	WP_018576271.1	WP_031567725.1	YP_096017.1	WP_006870318.1	WP_019233651.1	WP_028382121.1	WP_028385303.1	WP_003632409.1	WP_027270647.1	preprotein translocase subunit SecD [Legionella oakridgensis]	hypothetical protein	preprotein translocase subunit SecD [Legionella geestiana]	preprotein translocase subunit SecD [Legionella norrlandica]	preprotein translocase subunit SecD [Legionella fairfieldensis]	preprotein translocase subunit SecD [Legionella lansingensis]	preprotein translocase subunit SecD [Legionella shakespearei]	preprotein translocase subunit SecD [Legionella wadsworthii]	preprotein translocase subunit SecD [Legionella pneumophila subsp. pneumophila str. Philadelphia 1]	preprotein translocase subunit SecD [Legionella drancourtii]	preprotein translocase subunit SecD [Legionella anisa]	preprotein translocase subunit SecD [Legionella cherrii]	preprotein translocase subunit SecD [Legionella moravica]	preprotein translocase subunit SecD [Legionella longbeachae]	preprotein translocase subunit SecD [Legionella sainthelensi]
WP_025385360.1	lpari_01099	WP_028386698.1	WP_035891122.1	WP_028388703.1	WP_028374086.1	WP_018576273.1	WP_031565117.1	YP_096015.1	WP_006871515.1	WP_019233302.1	WP_028380179.1	WP_028385305.1	WP_003631920.1	WP_027271691.1	pterin-4-alpha-carbinolamine dehydratase [Legionella oakridgensis]	Putative pterin-4-alpha-carbinolamine dehydratase	pterin-4-alpha-carbinolamine dehydratase [Legionella geestiana]	pterin-4-alpha-carbinolamine dehydratase [Legionella norrlandica]	pterin-4-alpha-carbinolamine dehydratase [Legionella fairfieldensis]	pterin-4-alpha-carbinolamine dehydratase [Legionella lansingensis]	pterin-4-alpha-carbinolamine dehydratase [Legionella shakespearei]	pterin-4-alpha-carbinolamine dehydratase [Legionella wadsworthii]	pterin 4 alpha carbinolamine dehydratase [Legionella pneumophila subsp. pneumophila str. Philadelphia 1]	pterin-4-alpha-carbinolamine dehydratase [Legionella drancourtii]	pterin-4-alpha-carbinolamine dehydratase [Legionella anisa]	pterin-4-alpha-carbinolamine dehydratase [Legionella cherrii]	pterin-4-alpha-carbinolamine dehydratase [Legionella moravica]	pterin-4-alpha-carbinolamine dehydratase [Legionella longbeachae]	pterin-4-alpha-carbinolamine dehydratase [Legionella sainthelensi]
WP_025385363.1	lpari_01102	WP_028386697.1	WP_052117679.1	WP_051555176.1	WP_028374083.1	WP_018576277.1	WP_031565122.1	YP_096012.1	WP_006871519.1	WP_019233305.1	WP_028380183.1	WP_028385308.1	WP_003631916.1	WP_027271694.1	hypothetical protein [Legionella oakridgensis]	hypothetical protein	hypothetical protein [Legionella geestiana]	hypothetical protein [Legionella norrlandica]	hypothetical protein [Legionella fairfieldensis]	hypothetical protein [Legionella lansingensis]	hypothetical protein [Legionella shakespearei]	prepilin cleavage protein [Legionella wadsworthii]	hypothetical protein lpg1996 [Legionella pneumophila subsp. pneumophila str. Philadelphia 1]	prepilin cleavage protein [Legionella drancourtii]	hypothetical protein [Legionella anisa]	prepilin cleavage protein [Legionella cherrii]	prepilin cleavage protein [Legionella moravica]	prepilin cleavage protein [Legionella longbeachae]	prepilin cleavage protein [Legionella sainthelensi]
WP_025385364.1	lpari_01103	WP_028386696.1	WP_035891130.1	WP_028388700.1	WP_028374082.1	WP_018576278.1	WP_031565124.1	YP_096011.1	WP_006871520.1	WP_019233306.1	WP_028380184.1	WP_028385309.1	WP_003631915.1	WP_027271695.1	hypothetical protein [Legionella oakridgensis]	hypothetical protein	hypothetical protein [Legionella geestiana]	hypothetical protein [Legionella norrlandica]	hypothetical protein [Legionella fairfieldensis]	hypothetical protein [Legionella lansingensis]	hypothetical protein [Legionella shakespearei]	hypothetical protein [Legionella wadsworthii]	hypothetical protein lpg1995 [Legionella pneumophila subsp. pneumophila str. Philadelphia 1]	hypothetical protein [Legionella drancourtii]	hypothetical protein [Legionella anisa]	hypothetical protein [Legionella cherrii]	hypothetical protein [Legionella moravica]	hypothetical protein [Legionella longbeachae]	hypothetical protein [Legionella sainthelensi]
WP_025385391.1	lpari_01491	WP_028387000.1	WP_035888186.1	WP_028387532.1	WP_028373068.1	WP_018577581.1	WP_031564925.1	YP_094821.1	WP_006869251.1	WP_019235038.1	WP_028380080.1	WP_028385085.1	WP_003636653.1	WP_027271214.1	acetyl-CoA carboxylase subunit alpha [Legionella oakridgensis]	Acetyl-coenzyme A carboxylase carboxyl transferase subunit alpha	acetyl-CoA carboxylase subunit alpha [Legionella geestiana]	acetyl-CoA carboxylase subunit alpha [Legionella norrlandica]	acetyl-CoA carboxylase subunit alpha [Legionella fairfieldensis]	acetyl-CoA carboxylase subunit alpha [Legionella lansingensis]	acetyl-CoA carboxylase subunit alpha [Legionella shakespearei]	acetyl-CoA carboxylase subunit alpha [Legionella wadsworthii]	acetyl-CoA carboxylase carboxyltransferase subunit alpha [Legionella pneumophila subsp. pneumophila str. Philadelphia 1]	acetyl-CoA carboxylase subunit alpha [Legionella drancourtii]	acetyl-CoA carboxylase subunit alpha [Legionella anisa]	acetyl-CoA carboxylase subunit alpha [Legionella cherrii]	acetyl-CoA carboxylase subunit alpha [Legionella moravica]	acetyl-CoA carboxylase subunit alpha [Legionella longbeachae]	acetyl-CoA carboxylase subunit alpha [Legionella sainthelensi]
WP_025385393.1	lpari_02780	WP_028385679.1	WP_035890864.1	WP_035918972.1	WP_028372527.1	WP_018577832.1	WP_031567911.1	YP_096270.1	WP_006869813.1	WP_019233746.1	WP_028382225.1	WP_028383936.1	WP_003632520.1	WP_027270989.1	hypothetical protein [Legionella oakridgensis]	hypothetical protein	hypothetical protein [Legionella geestiana]	hypothetical protein [Legionella norrlandica]	hypothetical protein [Legionella fairfieldensis]	hypothetical protein [Legionella lansingensis]	hypothetical protein [Legionella shakespearei]	hypothetical protein [Legionella wadsworthii]	hypothetical protein lpg2258 [Legionella pneumophila subsp. pneumophila str. Philadelphia 1]	hypothetical protein [Legionella drancourtii]	hypothetical protein [Legionella anisa]	hypothetical protein [Legionella cherrii]	hypothetical protein [Legionella moravica]	hypothetical protein [Legionella longbeachae]	hypothetical protein [Legionella sainthelensi]
WP_025385394.1	lpari_00597	WP_028386365.1	WP_035888732.1	WP_028387663.1	WP_028373681.1	WP_040524056.1	WP_035899090.1	YP_095402.1	WP_006871675.1	WP_019232140.1	WP_028380366.1	WP_028384481.1	WP_003631773.1	WP_035905602.1	ribonuclease HII [Legionella oakridgensis]	Ribonuclease HII	ribonuclease HII [Legionella geestiana]	ribonuclease HII [Legionella norrlandica]	ribonuclease HII [Legionella fairfieldensis]	ribonuclease HII [Legionella lansingensis]	ribonuclease HII [Legionella shakespearei]	ribonuclease HII [Legionella wadsworthii]	ribonuclease HII [Legionella pneumophila subsp. pneumophila str. Philadelphia 1]	ribonuclease HII [Legionella drancourtii]	ribonuclease HII [Legionella anisa]	ribonuclease HII [Legionella cherrii]	ribonuclease HII [Legionella moravica]	ribonuclease HII [Legionella longbeachae]	ribonuclease HII [Legionella sainthelensi]
WP_025385399.1	lpari_00601	WP_028386361.1	WP_035887733.1	WP_028387833.1	WP_028373676.1	WP_018576851.1	WP_031565496.1	YP_095406.1	WP_006871668.1	WP_040521892.1	WP_028380370.1	WP_028384485.1	WP_003631770.1	WP_027269730.1	ribosome silencing factor RsfS [Legionella oakridgensis]	Ribosomal silencing factor RsfS	ribosome silencing factor RsfS [Legionella geestiana]	ribosome silencing factor RsfS [Legionella norrlandica]	ribosome silencing factor RsfS [Legionella fairfieldensis]	ribosome silencing factor RsfS [Legionella lansingensis]	ribosome silencing factor RsfS [Legionella shakespearei]	ribosome silencing factor RsfS [Legionella wadsworthii]	hypothetical protein lpg1377 [Legionella pneumophila subsp. pneumophila str. Philadelphia 1]	ribosome silencing factor RsfS [Legionella drancourtii]	ribosome silencing factor RsfS [Legionella anisa]	ribosome silencing factor RsfS [Legionella cherrii]	ribosome silencing factor RsfS [Legionella moravica]	ribosome silencing factor RsfS [Legionella longbeachae]	ribosome silencing factor RsfS [Legionella sainthelensi]
WP_025385400.1	lpari_00602	WP_051550894.1	WP_035887690.1	WP_028387834.1	WP_051546194.1	WP_018576850.1	WP_051635527.1	YP_095407.1	WP_050805563.1	WP_019232145.1	WP_051544429.1	WP_051190689.1	WP_049775013.1	WP_051544694.1	symporter [Legionella oakridgensis]	Dipeptide and tripeptide permease A	symporter [Legionella geestiana]	symporter [Legionella norrlandica]	symporter [Legionella fairfieldensis]	symporter [Legionella lansingensis]	symporter [Legionella shakespearei]	symporter [Legionella wadsworthii]	proton/peptide symporter, POT family protein [Legionella pneumophila subsp. pneumophila str. Philadelphia 1]	symporter [Legionella drancourtii]	symporter [Legionella anisa]	symporter [Legionella cherrii]	symporter [Legionella moravica]	symporter [Legionella longbeachae]	symporter [Legionella sainthelensi]
WP_025385401.1	lpari_00604	WP_028386359.1	WP_035887692.1	WP_028387835.1	WP_028373673.1	WP_018576848.1	WP_031565499.1	YP_095408.1	WP_006871664.1	WP_019232148.1	WP_028380372.1	WP_028384487.1	WP_003631768.1	WP_027269732.1	urocanate hydratase [Legionella oakridgensis]	Urocanate hydratase	urocanate hydratase [Legionella geestiana]	urocanate hydratase [Legionella norrlandica]	urocanate hydratase [Legionella fairfieldensis]	urocanate hydratase [Legionella lansingensis]	urocanate hydratase [Legionella shakespearei]	urocanate hydratase [Legionella wadsworthii]	urocanate hydratase [Legionella pneumophila subsp. pneumophila str. Philadelphia 1]	urocanate hydratase [Legionella drancourtii]	urocanate hydratase [Legionella anisa]	urocanate hydratase [Legionella cherrii]	urocanate hydratase [Legionella moravica]	urocanate hydratase [Legionella longbeachae]	urocanate hydratase [Legionella sainthelensi]
WP_025385402.1	lpari_00607	WP_028386357.1	WP_035887740.1	WP_028387838.1	WP_028373619.1	WP_018576843.1	WP_031565503.1	YP_095413.1	WP_006871661.1	WP_019232151.1	WP_028380375.1	WP_028384492.1	WP_003631764.1	WP_027269735.1	DNA polymerase III subunit epsilon [Legionella oakridgensis]	DNA polymerase III subunit epsilon	DNA polymerase III subunit epsilon [Legionella geestiana]	DNA polymerase III subunit epsilon [Legionella norrlandica]	DNA polymerase III subunit epsilon [Legionella fairfieldensis]	DNA polymerase III subunit epsilon [Legionella lansingensis]	DNA polymerase III subunit epsilon [Legionella shakespearei]	DNA polymerase III subunit epsilon [Legionella wadsworthii]	DNA polymerase III subunit epsilon [Legionella pneumophila subsp. pneumophila str. Philadelphia 1]	DNA polymerase III subunit epsilon [Legionella drancourtii]	DNA polymerase III subunit epsilon [Legionella anisa]	DNA polymerase III subunit epsilon [Legionella cherrii]	DNA polymerase III subunit epsilon [Legionella moravica]	DNA polymerase III subunit epsilon [Legionella longbeachae]	DNA polymerase III subunit epsilon [Legionella sainthelensi]
WP_025385405.1	lpari_00611	WP_028386356.1	WP_035887702.1	WP_028387840.1	WP_028373617.1	WP_018576840.1	WP_031565508.1	YP_095417.1	WP_006871656.1	WP_019232154.1	WP_028380378.1	WP_028384495.1	WP_003631760.1	WP_027269738.1	hypothetical protein [Legionella oakridgensis]	Iron-sulfur cluster insertion protein ErpA	hypothetical protein [Legionella geestiana]	iron-sulfur cluster insertion protein ErpA [Legionella norrlandica]	hypothetical protein [Legionella fairfieldensis]	hypothetical protein [Legionella lansingensis]	iron--sulfur cluster insertion protein ErpA [Legionella shakespearei]	hypothetical protein [Legionella wadsworthii]	iron-sulfur cluster insertion protein ErpA [Legionella pneumophila subsp. pneumophila str. Philadelphia 1]	iron--sulfur cluster insertion protein ErpA [Legionella drancourtii]	iron--sulfur cluster insertion protein ErpA [Legionella anisa]	hypothetical protein [Legionella cherrii]	hypothetical protein [Legionella moravica]	iron--sulfur cluster insertion protein ErpA [Legionella longbeachae]	hypothetical protein [Legionella sainthelensi]
WP_025385407.1	lpari_00613	WP_051550907.1	WP_035887704.1	WP_028387842.1	WP_028373615.1	WP_018576550.1	WP_031565513.1	YP_095419.1	WP_006871654.1	WP_019232156.1	WP_028380380.1	WP_028384497.1	WP_012979068.1	WP_027269740.1	hypothetical protein [Legionella oakridgensis]	hypothetical protein	hypothetical protein [Legionella geestiana]	metal-binding protein [Legionella norrlandica]	hypothetical protein [Legionella fairfieldensis]	metal-binding protein [Legionella lansingensis]	hypothetical protein [Legionella shakespearei]	metal-binding protein [Legionella wadsworthii]	hypothetical protein lpg1390 [Legionella pneumophila subsp. pneumophila str. Philadelphia 1]	metal-binding protein [Legionella drancourtii]	metal-binding protein [Legionella anisa]	metal-binding protein [Legionella cherrii]	metal-binding protein [Legionella moravica]	metal-binding protein [Legionella longbeachae]	metal-binding protein [Legionella sainthelensi]
WP_025385408.1	lpari_00614	WP_028386473.1	WP_035887706.1	WP_028387843.1	WP_028373614.1	WP_018576551.1	WP_031565514.1	YP_095420.1	WP_006871653.1	WP_019232157.1	WP_028380381.1	WP_028384498.1	WP_003631757.1	WP_027269741.1	50S ribosomal protein L32 [Legionella oakridgensis]	50S ribosomal protein L32	50S ribosomal protein L32 [Legionella geestiana]	50S ribosomal protein L32 [Legionella norrlandica]	50S ribosomal protein L32 [Legionella fairfieldensis]	50S ribosomal protein L32 [Legionella lansingensis]	50S ribosomal protein L32 [Legionella shakespearei]	50S ribosomal protein L32 [Legionella wadsworthii]	50S ribosomal protein L32 [Legionella pneumophila subsp. pneumophila str. Philadelphia 1]	50S ribosomal protein L32 [Legionella drancourtii]	50S ribosomal protein L32 [Legionella anisa]	50S ribosomal protein L32 [Legionella cherrii]	50S ribosomal protein L32 [Legionella moravica]	50S ribosomal protein L32 [Legionella longbeachae]	50S ribosomal protein L32 [Legionella sainthelensi]
WP_025385411.1	lpari_00618	WP_028386476.1	WP_035887715.1	WP_028387847.1	WP_028373610.1	WP_018576555.1	WP_031565521.1	YP_095424.1	WP_006871649.1	WP_019232161.1	WP_028380385.1	WP_028384502.1	WP_003631753.1	WP_027269745.1	3-ketoacyl-ACP reductase [Legionella oakridgensis]	3-oxoacyl-[acyl-carrier-protein] reductase FabG	3-ketoacyl-ACP reductase [Legionella geestiana]	3-ketoacyl-ACP reductase [Legionella norrlandica]	3-ketoacyl-ACP reductase [Legionella fairfieldensis]	3-ketoacyl-ACP reductase [Legionella lansingensis]	3-ketoacyl-ACP reductase [Legionella shakespearei]	3-ketoacyl-ACP reductase [Legionella wadsworthii]	3-oxoacyl-ACP reductase [Legionella pneumophila subsp. pneumophila str. Philadelphia 1]	3-ketoacyl-ACP reductase [Legionella drancourtii]	3-ketoacyl-ACP reductase [Legionella anisa]	3-ketoacyl-ACP reductase [Legionella cherrii]	3-ketoacyl-ACP reductase [Legionella moravica]	3-ketoacyl-ACP reductase [Legionella longbeachae]	3-ketoacyl-ACP reductase [Legionella sainthelensi]
WP_025385417.1	lpari_00622	WP_028386479.1	WP_035887720.1	WP_028387851.1	WP_035915730.1	WP_018576559.1	WP_051635528.1	YP_095428.1	WP_006871644.1	WP_019232164.1	WP_028380388.1	WP_028384505.1	WP_003631741.1	WP_027269748.1	thymidylate kinase [Legionella oakridgensis]	Thymidylate kinase	thymidylate kinase [Legionella geestiana]	thymidylate kinase [Legionella norrlandica]	thymidylate kinase [Legionella fairfieldensis]	thymidylate kinase [Legionella lansingensis]	hypothetical protein [Legionella shakespearei]	thymidylate kinase [Legionella wadsworthii]	thymidylate kinase [Legionella pneumophila subsp. pneumophila str. Philadelphia 1]	thymidylate kinase [Legionella drancourtii]	thymidylate kinase [Legionella anisa]	thymidylate kinase [Legionella cherrii]	thymidylate kinase [Legionella moravica]	thymidylate kinase [Legionella longbeachae]	thymidylate kinase [Legionella sainthelensi]
WP_025385420.1	lpari_00625	WP_028387121.1	WP_035886377.1	WP_028387852.1	WP_028373605.1	WP_018576562.1	WP_031565532.1	YP_095431.1	WP_006871641.1	WP_019232167.1	WP_028380391.1	WP_028384508.1	WP_003631738.1	WP_027269751.1	deoxyribonuclease [Legionella oakridgensis]	putative deoxyribonuclease YcfH	deoxyribonuclease [Legionella geestiana]	deoxyribonuclease [Legionella norrlandica]	deoxyribonuclease [Legionella fairfieldensis]	deoxyribonuclease [Legionella lansingensis]	DNAase [Legionella shakespearei]	deoxyribonuclease [Legionella wadsworthii]	deoxyribonuclease TatD [Legionella pneumophila subsp. pneumophila str. Philadelphia 1]	DNAase [Legionella drancourtii]	DNAase [Legionella anisa]	deoxyribonuclease [Legionella cherrii]	deoxyribonuclease [Legionella moravica]	DNAase [Legionella longbeachae]	deoxyribonuclease [Legionella sainthelensi]
WP_025385421.1	lpari_00626	WP_028387122.1	WP_035886375.1	WP_035917972.1	WP_051546189.1	WP_026253872.1	WP_031565534.1	YP_095432.1	WP_006871640.1	WP_019232168.1	WP_028380392.1	WP_028384511.1	WP_012979074.1	WP_027269752.1	anhydro-N-acetylmuramic acid kinase [Legionella oakridgensis]	Anhydro-N-acetylmuramic acid kinase	hypothetical protein [Legionella geestiana]	anhydro-N-acetylmuramic acid kinase [Legionella norrlandica]	anhydro-N-acetylmuramic acid kinase [Legionella fairfieldensis]	anhydro-N-acetylmuramic acid kinase [Legionella lansingensis]	anhydro-N-acetylmuramic acid kinase [Legionella shakespearei]	anhydro-N-acetylmuramic acid kinase [Legionella wadsworthii]	anhydro-N-acetylmuramic acid kinase [Legionella pneumophila subsp. pneumophila str. Philadelphia 1]	anhydro-N-acetylmuramic acid kinase [Legionella drancourtii]	anhydro-N-acetylmuramic acid kinase [Legionella anisa]	anhydro-N-acetylmuramic acid kinase [Legionella cherrii]	anhydro-N-acetylmuramic acid kinase [Legionella moravica]	anhydro-N-acetylmuramic acid kinase [Legionella longbeachae]	anhydro-N-acetylmuramic acid kinase [Legionella sainthelensi]
WP_025385425.1	lpari_01414	WP_028385722.1	WP_035890794.1	WP_028387525.1	WP_028373070.1	WP_018577574.1	WP_031564928.1	YP_094826.1	WP_006869255.1	WP_019235040.1	WP_028380083.1	WP_028385089.1	WP_003636658.1	WP_027271217.1	serine dehydratase [Legionella oakridgensis]	L-serine dehydratase TdcG	serine dehydratase [Legionella geestiana]	serine dehydratase [Legionella norrlandica]	serine dehydratase [Legionella fairfieldensis]	serine dehydratase [Legionella lansingensis]	serine dehydratase [Legionella shakespearei]	serine dehydratase [Legionella wadsworthii]	L-serine dehydratase [Legionella pneumophila subsp. pneumophila str. Philadelphia 1]	serine dehydratase [Legionella drancourtii]	serine dehydratase [Legionella anisa]	serine dehydratase [Legionella cherrii]	serine dehydratase [Legionella moravica]	serine dehydratase [Legionella longbeachae]	serine dehydratase [Legionella sainthelensi]
WP_025385428.1	lpari_02736	WP_028387022.1	WP_035887097.1	WP_028388679.1	WP_028372876.1	WP_018576152.1	WP_031567847.1	YP_094956.1	WP_040534725.1	WP_019233710.1	WP_028382189.1	WP_028384209.1	WP_003632483.1	WP_027270589.1	electron transfer flavoprotein subunit beta [Legionella oakridgensis]	Electron transfer flavoprotein subunit beta	hypothetical protein [Legionella geestiana]	electron transfer flavoprotein subunit beta [Legionella norrlandica]	electron transfer flavoprotein subunit beta [Legionella fairfieldensis]	electron transfer flavoprotein subunit beta [Legionella lansingensis]	EtfB protein [Legionella shakespearei]	electron transfer flavoprotein subunit beta [Legionella wadsworthii]	electron transfer flavoprotein subunit beta [Legionella pneumophila subsp. pneumophila str. Philadelphia 1]	electron transfer flavoprotein subunit beta [Legionella drancourtii]	EtfB protein [Legionella anisa]	electron transfer flavoprotein subunit beta [Legionella cherrii]	electron transfer flavoprotein subunit beta [Legionella moravica]	electron transfer flavoprotein subunit beta [Legionella longbeachae]	electron transfer flavoprotein subunit beta [Legionella sainthelensi]
WP_025385429.1	lpari_02735	WP_028387023.1	WP_035887099.1	WP_028388678.1	WP_028372875.1	WP_018576153.1	WP_031567844.1	YP_094957.1	WP_006870400.1	WP_019233709.1	WP_028382188.1	WP_028384208.1	WP_003632482.1	WP_027270590.1	electron transfer flavoprotein subunit beta [Legionella oakridgensis]	Electron transfer flavoprotein subunit alpha	electron transfer flavoprotein subunit beta [Legionella geestiana]	electron transfer flavoprotein subunit beta [Legionella norrlandica]	electron transfer flavoprotein subunit beta [Legionella fairfieldensis]	electron transfer flavoprotein subunit beta [Legionella lansingensis]	electron transfer flavoprotein subunit beta [Legionella shakespearei]	electron transfer flavoprotein subunit beta [Legionella wadsworthii]	electron transfer flavoprotein subunit alpha [Legionella pneumophila subsp. pneumophila str. Philadelphia 1]	electron transfer flavoprotein subunit beta [Legionella drancourtii]	electron transfer flavoprotein subunit beta [Legionella anisa]	electron transfer flavoprotein subunit beta [Legionella cherrii]	electron transfer flavoprotein subunit beta [Legionella moravica]	electron transfer flavoprotein subunit beta [Legionella longbeachae]	electron transfer flavoprotein subunit beta [Legionella sainthelensi]
WP_025385430.1	lpari_02734	WP_028387024.1	WP_035887101.1	WP_028388677.1	WP_028372874.1	WP_018576154.1	WP_031567842.1	YP_094958.1	WP_006870399.1	WP_019233708.1	WP_028382187.1	WP_028384207.1	WP_003632481.1	WP_027270591.1	alanine dehydrogenase [Legionella oakridgensis]	Alanine dehydrogenase	alanine dehydrogenase [Legionella geestiana]	alanine dehydrogenase [Legionella norrlandica]	alanine dehydrogenase [Legionella fairfieldensis]	alanine dehydrogenase [Legionella lansingensis]	alanine dehydrogenase [Legionella shakespearei]	alanine dehydrogenase [Legionella wadsworthii]	alanine dehydrogenase [Legionella pneumophila subsp. pneumophila str. Philadelphia 1]	alanine dehydrogenase [Legionella drancourtii]	alanine dehydrogenase [Legionella anisa]	alanine dehydrogenase [Legionella cherrii]	alanine dehydrogenase [Legionella moravica]	alanine dehydrogenase [Legionella longbeachae]	alanine dehydrogenase [Legionella sainthelensi]
WP_025385438.1	lpari_01066	WP_028387402.1	WP_035887117.1	WP_028389590.1	WP_028372865.1	WP_018576166.1	WP_031565066.1	YP_094969.1	WP_006870452.1	WP_019235109.1	WP_028380148.1	WP_028384393.1	WP_003636826.1	WP_027272321.1	universal stress protein UspA [Legionella oakridgensis]	hypothetical protein	universal stress protein UspA [Legionella geestiana]	universal stress protein UspA [Legionella norrlandica]	universal stress protein UspA [Legionella fairfieldensis]	universal stress protein UspA [Legionella lansingensis]	universal stress protein A [Legionella shakespearei]	universal stress protein UspA [Legionella wadsworthii]	universal stress protein A (UspA) [Legionella pneumophila subsp. pneumophila str. Philadelphia 1]	universal stress protein A [Legionella drancourtii]	universal stress protein A [Legionella anisa]	universal stress protein UspA [Legionella cherrii]	universal stress protein UspA [Legionella moravica]	universal stress protein A [Legionella longbeachae]	universal stress protein UspA [Legionella sainthelensi]
WP_025385439.1	lpari_01067	WP_028387401.1	WP_035887118.1	WP_028389586.1	WP_028372863.1	WP_018576167.1	WP_031565067.1	YP_094970.1	WP_040534758.1	WP_019235110.1	WP_028380149.1	WP_028385551.1	WP_003636827.1	WP_027272322.1	FMN adenylyltransferase [Legionella oakridgensis]	Riboflavin biosynthesis protein RibF	hypothetical protein [Legionella geestiana]	FMN adenylyltransferase [Legionella norrlandica]	FMN adenylyltransferase [Legionella fairfieldensis]	FMN adenylyltransferase [Legionella lansingensis]	hypothetical protein [Legionella shakespearei]	FMN adenylyltransferase [Legionella wadsworthii]	riboflavin biosynthesis RibF [Legionella pneumophila subsp. pneumophila str. Philadelphia 1]	FMN adenylyltransferase [Legionella drancourtii]	FMN adenylyltransferase [Legionella anisa]	FMN adenylyltransferase [Legionella cherrii]	FMN adenylyltransferase [Legionella moravica]	riboflavin biosynthesis protein RibF [Legionella longbeachae]	FMN adenylyltransferase [Legionella sainthelensi]
WP_025385440.1	lpari_01069	WP_028387400.1	WP_035887119.1	WP_028389585.1	WP_028372862.1	WP_018576168.1	WP_031565069.1	YP_094971.1	WP_006870450.1	WP_019235111.1	WP_028380150.1	WP_028385550.1	WP_003636828.1	WP_027272323.1	isoleucyl-tRNA synthetase [Legionella oakridgensis]	Isoleucine--tRNA ligase	isoleucyl-tRNA synthetase [Legionella geestiana]	isoleucyl-tRNA synthetase [Legionella norrlandica]	isoleucyl-tRNA synthetase [Legionella fairfieldensis]	isoleucyl-tRNA synthetase [Legionella lansingensis]	isoleucyl-tRNA synthetase [Legionella shakespearei]	isoleucyl-tRNA synthetase [Legionella wadsworthii]	isoleucyl-tRNA synthetase [Legionella pneumophila subsp. pneumophila str. Philadelphia 1]	isoleucyl-tRNA synthetase [Legionella drancourtii]	isoleucyl-tRNA synthetase [Legionella anisa]	isoleucyl-tRNA synthetase [Legionella cherrii]	isoleucyl-tRNA synthetase [Legionella moravica]	isoleucyl-tRNA synthetase [Legionella longbeachae]	isoleucyl-tRNA synthetase [Legionella sainthelensi]
WP_025385441.1	lpari_01070	WP_028387399.1	WP_035887120.1	WP_028389584.1	WP_028372861.1	WP_018576169.1	WP_031565071.1	YP_094972.1	WP_006870449.1	WP_019235112.1	WP_028380151.1	WP_028385549.1	WP_003636829.1	WP_027272324.1	signal peptidase II [Legionella oakridgensis]	Lipoprotein signal peptidase	signal peptidase II [Legionella geestiana]	signal peptidase II [Legionella norrlandica]	signal peptidase II [Legionella fairfieldensis]	signal peptidase II [Legionella lansingensis]	signal peptidase II [Legionella shakespearei]	signal peptidase II [Legionella wadsworthii]	lipoprotein signal peptidase [Legionella pneumophila subsp. pneumophila str. Philadelphia 1]	signal peptidase II [Legionella drancourtii]	signal peptidase II [Legionella anisa]	signal peptidase II [Legionella cherrii]	signal peptidase II [Legionella moravica]	signal peptidase II [Legionella longbeachae]	signal peptidase II [Legionella sainthelensi]
WP_025385446.1	lpari_01078	WP_028387394.1	WP_035887123.1	WP_028389579.1	WP_028372857.1	WP_018576175.1	WP_031565079.1	YP_094977.1	WP_040534751.1	WP_019235119.1	WP_028380160.1	WP_028384897.1	WP_003636837.1	WP_027272169.1	DNA repair protein RecO [Legionella oakridgensis]	DNA repair protein RecO	hypothetical protein [Legionella geestiana]	DNA repair protein RecO [Legionella norrlandica]	DNA repair protein RecO [Legionella fairfieldensis]	DNA repair protein RecO [Legionella lansingensis]	DNA repair protein RecO [Legionella shakespearei]	DNA repair protein RecO [Legionella wadsworthii]	DNA repair protein RecO [Legionella pneumophila subsp. pneumophila str. Philadelphia 1]	DNA repair protein RecO [Legionella drancourtii]	DNA repair protein RecO [Legionella anisa]	DNA repair protein RecO [Legionella cherrii]	DNA repair protein RecO [Legionella moravica]	DNA repair protein RecO [Legionella longbeachae]	DNA recombination protein RecO [Legionella sainthelensi]
WP_025385450.1	lpari_01083	WP_028386962.1	WP_035887127.1	WP_028388490.1	WP_028372852.1	WP_018576178.1	WP_031565086.1	YP_094983.1	WP_040534749.1	WP_019235124.1	WP_028380164.1	WP_028384901.1	WP_003636844.1	WP_027272172.1	membrane protein [Legionella oakridgensis]	Modulator of FtsH protease YccA	membrane protein [Legionella geestiana]	membrane protein [Legionella norrlandica]	membrane protein [Legionella fairfieldensis]	membrane protein [Legionella lansingensis]	hypothetical protein [Legionella shakespearei]	membrane protein [Legionella wadsworthii]	carrier/transport protein [Legionella pneumophila subsp. pneumophila str. Philadelphia 1]	membrane protein [Legionella drancourtii]	hypothetical protein [Legionella anisa]	membrane protein [Legionella cherrii]	membrane protein [Legionella moravica]	hypothetical protein [Legionella longbeachae]	membrane protein [Legionella sainthelensi]
WP_025385451.1	lpari_01084	WP_051550989.1	WP_035887128.1	WP_028388489.1	WP_028372851.1	WP_018576179.1	WP_031565088.1	YP_094984.1	WP_040534770.1	WP_019235125.1	WP_028380165.1	WP_028384902.1	WP_003636845.1	WP_027272173.1	apolipoprotein acyltransferase [Legionella oakridgensis]	2-oxoglutaramate amidase	hypothetical protein [Legionella geestiana]	apolipoprotein acyltransferase [Legionella norrlandica]	apolipoprotein acyltransferase [Legionella fairfieldensis]	apolipoprotein acyltransferase [Legionella lansingensis]	apolipoprotein acyltransferase [Legionella shakespearei]	apolipoprotein acyltransferase [Legionella wadsworthii]	nitrilase [Legionella pneumophila subsp. pneumophila str. Philadelphia 1]	apolipoprotein acyltransferase [Legionella drancourtii]	apolipoprotein acyltransferase [Legionella anisa]	apolipoprotein acyltransferase [Legionella cherrii]	apolipoprotein acyltransferase [Legionella moravica]	apolipoprotein acyltransferase [Legionella longbeachae]	apolipoprotein acyltransferase [Legionella sainthelensi]
WP_025385458.1	lpari_01412	WP_028385724.1	WP_035890793.1	WP_028387524.1	WP_028373071.1	WP_018577573.1	WP_031564932.1	YP_094827.1	WP_006869256.1	WP_019235041.1	WP_028380084.1	WP_028385090.1	WP_003636663.1	WP_027271218.1	membrane protein [Legionella oakridgensis]	Outer membrane protein MIP	membrane protein [Legionella geestiana]	membrane protein [Legionella norrlandica]	membrane protein [Legionella fairfieldensis]	membrane protein [Legionella lansingensis]	membrane protein [Legionella shakespearei]	membrane protein [Legionella wadsworthii]	macrophage infectivity potentiator (Mip) [Legionella pneumophila subsp. pneumophila str. Philadelphia 1]	membrane protein [Legionella drancourtii]	membrane protein [Legionella anisa]	membrane protein [Legionella cherrii]	membrane protein [Legionella moravica]	outer membrane protein MIP [Legionella longbeachae]	outer membrane protein MIP [Legionella sainthelensi]
WP_025385461.1	lpari_02020	WP_028385726.1	WP_035890393.1	WP_028387518.1	WP_028373074.1	WP_018577569.1	WP_031564941.1	YP_094833.1	WP_040534102.1	WP_019235046.1	WP_028380088.1	WP_028385093.1	WP_003636676.1	WP_027271232.1	hypothetical protein [Legionella oakridgensis]	hypothetical protein	hypothetical protein [Legionella geestiana]	hypothetical protein [Legionella norrlandica]	hypothetical protein [Legionella fairfieldensis]	hypothetical protein [Legionella lansingensis]	hypothetical protein [Legionella shakespearei]	hypothetical protein [Legionella wadsworthii]	hypothetical protein lpg0798 [Legionella pneumophila subsp. pneumophila str. Philadelphia 1]	hypothetical protein [Legionella drancourtii]	hypothetical protein [Legionella anisa]	hypothetical protein [Legionella cherrii]	hypothetical protein [Legionella moravica]	hypothetical protein [Legionella longbeachae]	hypothetical protein [Legionella sainthelensi]
WP_025385462.1	lpari_02022	WP_028385732.1	WP_035890386.1	WP_028389086.1	WP_028373077.1	WP_018577567.1	WP_031564947.1	YP_094834.1	WP_006869277.1	WP_019235048.1	WP_028380091.1	WP_028385095.1	WP_003636677.1	WP_027271233.1	quinolinate synthetase [Legionella oakridgensis]	Quinolinate synthase A	quinolinate synthetase [Legionella geestiana]	quinolinate synthetase [Legionella norrlandica]	quinolinate synthetase [Legionella fairfieldensis]	quinolinate synthetase [Legionella lansingensis]	quinolinate synthetase [Legionella shakespearei]	quinolinate synthetase [Legionella wadsworthii]	quinolinate synthetase [Legionella pneumophila subsp. pneumophila str. Philadelphia 1]	quinolinate synthetase [Legionella drancourtii]	quinolinate synthetase [Legionella anisa]	quinolinate synthetase [Legionella cherrii]	quinolinate synthetase [Legionella moravica]	quinolinate synthetase [Legionella longbeachae]	quinolinate synthetase [Legionella sainthelensi]
WP_025385463.1	lpari_02024	WP_028385734.1	WP_035890382.1	WP_028389084.1	WP_028373079.1	WP_018577565.1	WP_031564951.1	YP_094836.1	WP_006869279.1	WP_019235050.1	WP_028380093.1	WP_028385097.1	WP_003636682.1	WP_027271235.1	adenylosuccinate lyase [Legionella oakridgensis]	Adenylosuccinate lyase	adenylosuccinate lyase [Legionella geestiana]	adenylosuccinate lyase [Legionella norrlandica]	adenylosuccinate lyase [Legionella fairfieldensis]	adenylosuccinate lyase [Legionella lansingensis]	adenylosuccinate lyase [Legionella shakespearei]	adenylosuccinate lyase [Legionella wadsworthii]	adenylosuccinate lyase [Legionella pneumophila subsp. pneumophila str. Philadelphia 1]	adenylosuccinate lyase [Legionella drancourtii]	adenylosuccinate lyase [Legionella anisa]	adenylosuccinate lyase [Legionella cherrii]	adenylosuccinate lyase [Legionella moravica]	adenylosuccinate lyase [Legionella longbeachae]	adenylosuccinate lyase [Legionella sainthelensi]
WP_025385465.1	lpari_02028	WP_028385737.1	WP_035890367.1	WP_028389079.1	WP_028374258.1	WP_018577560.1	WP_031564957.1	YP_094842.1	WP_006869285.1	WP_019235054.1	WP_028380097.1	WP_028385101.1	WP_003636689.1	WP_027271238.1	nicotinate-nucleotide pyrophosphorylase [Legionella oakridgensis]	Nicotinate-nucleotide pyrophosphorylase [carboxylating]	nicotinate-nucleotide pyrophosphorylase [Legionella geestiana]	nicotinate-nucleotide pyrophosphorylase [Legionella norrlandica]	nicotinate-nucleotide pyrophosphorylase [Legionella fairfieldensis]	nicotinate-nucleotide pyrophosphorylase [Legionella lansingensis]	nicotinate-nucleotide pyrophosphorylase [Legionella shakespearei]	nicotinate-nucleotide pyrophosphorylase [Legionella wadsworthii]	nicotinate-nucleotide pyrophosphorylase [Legionella pneumophila subsp. pneumophila str. Philadelphia 1]	nicotinate-nucleotide pyrophosphorylase [Legionella drancourtii]	nicotinate-nucleotide pyrophosphorylase [Legionella anisa]	nicotinate-nucleotide pyrophosphorylase [Legionella cherrii]	nicotinate-nucleotide pyrophosphorylase [Legionella moravica]	nicotinate-nucleotide pyrophosphorylase [Legionella longbeachae]	nicotinate-nucleotide pyrophosphorylase [Legionella sainthelensi]
WP_025385466.1	lpari_02029	WP_028385738.1	WP_035890365.1	WP_028389078.1	WP_035916311.1	WP_018577559.1	WP_031564958.1	YP_094843.1	WP_006869286.1	WP_019235055.1	WP_028380098.1	WP_028385102.1	WP_003636692.1	WP_027271239.1	UDP-diphospho-muramoylpentapeptide beta-N- acetylglucosaminyltransferase [Legionella oakridgensis]	UDP-N-acetylglucosamine--N-acetylmuramyl-(pentapeptide) pyrophosphoryl-undecaprenol N-acetylglucosamine transferase	UDP-diphospho-muramoylpentapeptide beta-N- acetylglucosaminyltransferase [Legionella geestiana]	UDP-diphospho-muramoylpentapeptide beta-N- acetylglucosaminyltransferase [Legionella norrlandica]	UDP-diphospho-muramoylpentapeptide beta-N- acetylglucosaminyltransferase [Legionella fairfieldensis]	UDP-diphospho-muramoylpentapeptide beta-N- acetylglucosaminyltransferase [Legionella lansingensis]	UDP-diphospho-muramoylpentapeptide beta-N- acetylglucosaminyltransferase [Legionella shakespearei]	UDP-diphospho-muramoylpentapeptide beta-N- acetylglucosaminyltransferase [Legionella wadsworthii]	undecaprenyldiphospho-muramoylpentapeptide beta-N- acetylglucosaminyltransferase [Legionella pneumophila subsp. pneumophila str. Philadelphia 1]	UDP-diphospho-muramoylpentapeptide beta-N- acetylglucosaminyltransferase [Legionella drancourtii]	UDP-diphospho-muramoylpentapeptide beta-N- acetylglucosaminyltransferase [Legionella anisa]	UDP-diphospho-muramoylpentapeptide beta-N- acetylglucosaminyltransferase [Legionella cherrii]	UDP-diphospho-muramoylpentapeptide beta-N- acetylglucosaminyltransferase [Legionella moravica]	UDP-diphospho-muramoylpentapeptide beta-N- acetylglucosaminyltransferase [Legionella longbeachae]	UDP-diphospho-muramoylpentapeptide beta-N- acetylglucosaminyltransferase [Legionella sainthelensi]
WP_025385467.1	lpari_02032	WP_028385739.1	WP_035890361.1	WP_028389076.1	WP_028374260.1	WP_018577557.1	WP_031564960.1	YP_094845.1	WP_006869288.1	WP_019235057.1	WP_028380100.1	WP_028385104.1	WP_003636695.1	WP_027271241.1	hypothetical protein [Legionella oakridgensis]	ComE operon protein 1	hypothetical protein [Legionella geestiana]	competence protein ComEA [Legionella norrlandica]	competence protein ComEA [Legionella fairfieldensis]	competence protein ComEA [Legionella lansingensis]	hypothetical protein [Legionella shakespearei]	competence protein ComEA [Legionella wadsworthii]	hypothetical protein lpg0810 [Legionella pneumophila subsp. pneumophila str. Philadelphia 1]	competence protein ComEA [Legionella drancourtii]	competence protein ComEA [Legionella anisa]	competence protein ComEA [Legionella cherrii]	competence protein ComEA [Legionella moravica]	competence protein ComEA [Legionella longbeachae]	competence protein ComEA [Legionella sainthelensi]
WP_025385470.1	lpari_00329	WP_028385745.1	WP_035890350.1	WP_035918637.1	WP_028374265.1	WP_018577550.1	WP_031564987.1	YP_094852.1	WP_006869299.1	WP_019235066.1	WP_028380106.1	WP_028385113.1	WP_003636711.1	WP_027271247.1	Clp protease ClpS [Legionella oakridgensis]	ATP-dependent Clp protease adapter protein ClpS	Clp protease ClpS [Legionella geestiana]	Clp protease ClpS [Legionella norrlandica]	Clp protease ClpS [Legionella fairfieldensis]	Clp protease ClpS [Legionella lansingensis]	ATP-dependent Clp protease ClpS [Legionella shakespearei]	Clp protease ClpS [Legionella wadsworthii]	ATP-dependent Clp protease adaptor protein ClpS [Legionella pneumophila subsp. pneumophila str. Philadelphia 1]	ATP-dependent Clp protease ClpS [Legionella drancourtii]	ATP-dependent Clp protease ClpS [Legionella anisa]	Clp protease ClpS [Legionella cherrii]	Clp protease ClpS [Legionella moravica]	ATP-dependent Clp protease ClpS [Legionella longbeachae]	Clp protease ClpS [Legionella sainthelensi]
WP_025385472.1	lpari_00331	WP_028385768.1	WP_035890684.1	WP_028389069.1	WP_028374267.1	WP_018577548.1	WP_031564990.1	YP_094856.1	WP_006869301.1	WP_019235068.1	WP_028380108.1	WP_028385116.1	WP_003636714.1	WP_027271249.1	glycosyl transferase [Legionella oakridgensis]	Putative glycosyltransferase EpsH	glycosyl transferase [Legionella geestiana]	glycosyl transferase [Legionella norrlandica]	glycosyl transferase [Legionella fairfieldensis]	glycosyl transferase [Legionella lansingensis]	hypothetical protein [Legionella shakespearei]	glycosyl transferase [Legionella wadsworthii]	lipopolysaccharide biosynthesis glycosyltransferase [Legionella pneumophila subsp. pneumophila str. Philadelphia 1]	glycosyl transferase [Legionella drancourtii]	glycosyl transferase [Legionella anisa]	glycosyl transferase [Legionella cherrii]	glycosyl transferase [Legionella moravica]	glycosyl transferase [Legionella longbeachae]	glycosyl transferase [Legionella sainthelensi]
WP_025385482.1	lpari_01096	WP_028387198.1	WP_035887142.1	WP_028389198.1	WP_028374281.1	WP_018576190.1	WP_031565112.1	YP_094994.1	WP_006870417.1	WP_019233299.1	WP_028380176.1	WP_028384921.1	WP_003636861.1	WP_027272183.1	peptide ABC transporter permease [Legionella oakridgensis]	Dipeptide transport system permease protein DppB	peptide ABC transporter permease [Legionella geestiana]	peptide ABC transporter permease [Legionella norrlandica]	peptide ABC transporter permease [Legionella fairfieldensis]	peptide ABC transporter permease [Legionella lansingensis]	peptide ABC transporter permease [Legionella shakespearei]	peptide ABC transporter permease [Legionella wadsworthii]	peptide ABC transporter permease [Legionella pneumophila subsp. pneumophila str. Philadelphia 1]	peptide ABC transporter permease [Legionella drancourtii]	peptide ABC transporter permease [Legionella anisa]	peptide ABC transporter permease [Legionella cherrii]	peptide ABC transporter permease [Legionella moravica]	peptide ABC transporter permease [Legionella longbeachae]	peptide ABC transporter permease [Legionella sainthelensi]
WP_025385483.1	lpari_01097	WP_028387199.1	WP_035887143.1	WP_028389197.1	WP_028374282.1	WP_018576192.1	WP_031565114.1	YP_094995.1	WP_040534742.1	WP_040522414.1	WP_028380177.1	WP_028384922.1	WP_012979209.1	WP_027272184.1	peptide ABC transporter permease [Legionella oakridgensis]	Glutathione transport system permease protein GsiD	peptide ABC transporter permease [Legionella geestiana]	peptide ABC transporter permease [Legionella norrlandica]	peptide ABC transporter permease [Legionella fairfieldensis]	peptide ABC transporter permease [Legionella lansingensis]	peptide ABC transporter permease [Legionella shakespearei]	peptide ABC transporter permease [Legionella wadsworthii]	peptide ABC transporter permease [Legionella pneumophila subsp. pneumophila str. Philadelphia 1]	peptide ABC transporter permease [Legionella drancourtii]	peptide ABC transporter permease [Legionella anisa]	peptide ABC transporter permease [Legionella cherrii]	peptide ABC transporter permease [Legionella moravica]	peptide ABC transporter permease [Legionella longbeachae]	peptide ABC transporter permease [Legionella sainthelensi]
WP_025385485.1	lpari_01052	WP_028387201.1	WP_035889584.1	WP_035918161.1	WP_051546308.1	WP_018577516.1	WP_031565042.1	YP_094887.1	WP_006870468.1	WP_019235095.1	WP_028380134.1	WP_028385148.1	WP_012979233.1	WP_027271274.1	hypothetical protein [Legionella oakridgensis]	hypothetical protein	hypothetical protein [Legionella geestiana]	hypothetical protein [Legionella norrlandica]	hypothetical protein [Legionella fairfieldensis]	hypothetical protein [Legionella lansingensis]	hypothetical protein [Legionella shakespearei]	hypothetical protein [Legionella wadsworthii]	hypothetical protein lpg0852 [Legionella pneumophila subsp. pneumophila str. Philadelphia 1]	hypothetical protein [Legionella drancourtii]	hypothetical protein [Legionella anisa]	hypothetical protein [Legionella cherrii]	hypothetical protein [Legionella moravica]	hypothetical protein [Legionella longbeachae]	hypothetical protein [Legionella sainthelensi]
WP_025385487.1	lpari_01055	WP_028387205.1	WP_035889578.1	WP_028388375.1	WP_028374295.1	WP_018577513.1	WP_031565048.1	YP_094890.2	WP_006870465.1	WP_019235098.1	WP_028380137.1	WP_028385152.1	WP_003636757.1	WP_027271277.1	peptidase S49 [Legionella oakridgensis]	putative protease SohB	peptidase S49 [Legionella geestiana]	peptidase S49 [Legionella norrlandica]	peptidase S49 [Legionella fairfieldensis]	peptidase S49 [Legionella lansingensis]	protease [Legionella shakespearei]	peptidase S49 [Legionella wadsworthii]	protease [Legionella pneumophila subsp. pneumophila str. Philadelphia 1]	protease [Legionella drancourtii]	protease [Legionella anisa]	peptidase S49 [Legionella cherrii]	peptidase S49 [Legionella moravica]	protease [Legionella longbeachae]	peptidase S49 [Legionella sainthelensi]
WP_025385488.1	lpari_01056	WP_028387206.1	WP_035889576.1	WP_028388376.1	WP_028374297.1	WP_018577509.1	WP_031565050.1	YP_094891.2	WP_006870462.1	WP_019235100.1	WP_028380138.1	WP_028385153.1	WP_012979218.1	WP_027272312.1	cytochrome C biogenesis protein CcmA [Legionella oakridgensis]	Cytochrome c biogenesis ATP-binding export protein CcmA	heme ABC exporter ATP-binding protein CcmA [Legionella geestiana]	cytochrome C biogenesis protein CcmA [Legionella norrlandica]	cytochrome C biogenesis protein CcmA [Legionella fairfieldensis]	cytochrome C biogenesis protein CcmA [Legionella lansingensis]	heme ABC exporter ATP-binding protein CcmA [Legionella shakespearei]	cytochrome C biogenesis protein CcmA [Legionella wadsworthii]	cytochrome c biogenesis protein CcmA [Legionella pneumophila subsp. pneumophila str. Philadelphia 1]	cytochrome C biogenesis protein CcmA [Legionella drancourtii]	cytochrome C biogenesis protein CcmA [Legionella anisa]	cytochrome C biogenesis protein CcmA [Legionella cherrii]	cytochrome C biogenesis protein CcmA [Legionella moravica]	cytochrome C biogenesis protein CcmA [Legionella longbeachae]	cytochrome C biogenesis protein CcmA [Legionella sainthelensi]
WP_025385489.1	lpari_01059	WP_028387208.1	WP_035889614.1	WP_028389675.1	WP_028374299.1	WP_018577507.1	WP_031565053.1	YP_094893.1	WP_040534760.1	WP_040523255.1	WP_028380140.1	WP_028385155.1	WP_003636817.1	WP_035906603.1	heme ABC transporter permease [Legionella oakridgensis]	Heme exporter protein C	heme ABC transporter permease [Legionella geestiana]	heme ABC transporter permease [Legionella norrlandica]	heme ABC transporter permease [Legionella fairfieldensis]	heme ABC transporter permease [Legionella lansingensis]	heme ABC transporter permease [Legionella shakespearei]	heme ABC transporter permease [Legionella wadsworthii]	heme exporter protein CcmC [Legionella pneumophila subsp. pneumophila str. Philadelphia 1]	heme ABC transporter permease [Legionella drancourtii]	heme ABC transporter permease [Legionella anisa]	heme ABC transporter permease [Legionella cherrii]	heme ABC transporter permease [Legionella moravica]	heme ABC transporter permease [Legionella longbeachae]	heme ABC transporter permease [Legionella sainthelensi]
WP_025385491.1	lpari_01061	WP_028387209.1	WP_035889570.1	WP_028389673.1	WP_028374301.1	WP_018577505.1	WP_031565056.1	YP_094895.1	WP_006870457.1	WP_019235104.1	WP_028380142.1	WP_028385157.1	WP_003636819.1	WP_027272316.1	cytochrome C biogenesis protein CcmE [Legionella oakridgensis]	Cytochrome c-type biogenesis protein CcmE	cytochrome C biogenesis protein CcmE [Legionella geestiana]	cytochrome C biogenesis protein CcmE [Legionella norrlandica]	cytochrome C biogenesis protein CcmE [Legionella fairfieldensis]	cytochrome C biogenesis protein CcmE [Legionella lansingensis]	cytochrome C biogenesis protein CcmC [Legionella shakespearei]	cytochrome C biogenesis protein CcmE [Legionella wadsworthii]	cytochrome C biogenesis protein CcmE [Legionella pneumophila subsp. pneumophila str. Philadelphia 1]	cytochrome C biogenesis protein CcmC [Legionella drancourtii]	cytochrome C biogenesis protein CcmC [Legionella anisa]	cytochrome C biogenesis protein CcmE [Legionella cherrii]	cytochrome C biogenesis protein CcmE [Legionella moravica]	cytochrome C biogenesis protein CcmC [Legionella longbeachae]	cytochrome C biogenesis protein CcmE [Legionella sainthelensi]
WP_025385492.1	lpari_01064	WP_051551045.1	WP_035889557.1	WP_028389670.1	WP_051546333.1	WP_018577502.1	WP_031565062.1	YP_094898.1	WP_006870454.1	WP_019235107.1	WP_051544403.1	WP_028385160.1	WP_003636822.1	WP_027272319.1	cytochrome C biogenesis protein [Legionella oakridgensis]	Cytochrome c-type biogenesis protein CcmH	hypothetical protein [Legionella geestiana]	cytochrome C biogenesis protein [Legionella norrlandica]	cytochrome C biogenesis protein [Legionella fairfieldensis]	cytochrome C biogenesis protein [Legionella lansingensis]	cytochrome C biogenesis protein [Legionella shakespearei]	cytochrome C biogenesis protein [Legionella wadsworthii]	cytochrome C biogenesis protein CcmH [Legionella pneumophila subsp. pneumophila str. Philadelphia 1]	cytochrome C biogenesis protein [Legionella drancourtii]	cytochrome C biogenesis protein [Legionella anisa]	cytochrome C biogenesis protein [Legionella cherrii]	cytochrome C biogenesis protein [Legionella moravica]	cytochrome C biogenesis protein [Legionella longbeachae]	cytochrome C biogenesis protein [Legionella sainthelensi]
WP_025385493.1	lpari_01065	WP_051551034.1	WP_035889551.1	WP_028389669.1	WP_028374305.1	WP_018577501.1	WP_031565064.1	YP_094899.1	WP_006870453.1	WP_019235108.1	WP_028380146.1	WP_028385161.1	WP_012979216.1	WP_027272320.1	cytochrome C biogenesis protein CcmH [Legionella oakridgensis]	Cytochrome c-type biogenesis protein CcmH	hypothetical protein [Legionella geestiana]	cytochrome C biogenesis protein CcmH [Legionella norrlandica]	cytochrome C biogenesis protein CcmH [Legionella fairfieldensis]	cytochrome C biogenesis protein CcmH [Legionella lansingensis]	hypothetical protein [Legionella shakespearei]	cytochrome C biogenesis protein CcmH [Legionella wadsworthii]	cytochrome c type biogenesis protein CcmH [Legionella pneumophila subsp. pneumophila str. Philadelphia 1]	cytochrome C type biogenesis protein CcmH [Legionella drancourtii]	cytochrome C type biogenesis protein CcmH [Legionella anisa]	cytochrome C biogenesis protein CcmH [Legionella cherrii]	cytochrome C biogenesis protein CcmH [Legionella moravica]	cytochrome C type biogenesis protein CcmH [Legionella longbeachae]	cytochrome C biogenesis protein CcmH [Legionella sainthelensi]
WP_025385495.1	lpari_02707	WP_028386189.1	WP_035889521.1	WP_028389557.1	WP_028374308.1	WP_018577497.1	WP_031567784.1	YP_094902.1	WP_006870369.1	WP_019233684.1	WP_028382164.1	WP_028385165.1	WP_003632459.1	WP_027270610.1	ATP-dependent DNA helicase RecQ [Legionella oakridgensis]	ATP-dependent DNA helicase RecQ	ATP-dependent DNA helicase RecQ [Legionella geestiana]	ATP-dependent DNA helicase RecQ [Legionella norrlandica]	ATP-dependent DNA helicase RecQ [Legionella fairfieldensis]	ATP-dependent DNA helicase RecQ [Legionella lansingensis]	ATP-dependent DNA helicase RecQ [Legionella shakespearei]	ATP-dependent DNA helicase RecQ [Legionella wadsworthii]	ATP-dependent DNA helicase RecQ [Legionella pneumophila subsp. pneumophila str. Philadelphia 1]	ATP-dependent DNA helicase RecQ [Legionella drancourtii]	ATP-dependent DNA helicase RecQ [Legionella anisa]	ATP-dependent DNA helicase RecQ [Legionella cherrii]	ATP-dependent DNA helicase RecQ [Legionella moravica]	ATP-dependent DNA helicase RecQ [Legionella longbeachae]	ATP-dependent DNA helicase RecQ [Legionella sainthelensi]
WP_025385496.1	lpari_02705	WP_028386190.1	WP_035889518.1	WP_028389556.1	WP_028374309.1	WP_018577496.1	WP_031567780.1	YP_094903.1	WP_006870367.1	WP_019233681.1	WP_028382162.1	WP_028385166.1	WP_003632457.1	WP_027270612.1	acyl-CoA dehydrogenase [Legionella oakridgensis]	Acryloyl-CoA reductase (NADH)	acyl-CoA dehydrogenase [Legionella geestiana]	acyl-CoA dehydrogenase [Legionella norrlandica]	acyl-CoA dehydrogenase [Legionella fairfieldensis]	acyl-CoA dehydrogenase [Legionella lansingensis]	acyl-CoA dehydrogenase [Legionella shakespearei]	acyl-CoA dehydrogenase [Legionella wadsworthii]	acyl CoA dehydrogenase [Legionella pneumophila subsp. pneumophila str. Philadelphia 1]	acyl-CoA dehydrogenase [Legionella drancourtii]	acyl-CoA dehydrogenase [Legionella anisa]	acyl-CoA dehydrogenase [Legionella cherrii]	acyl-CoA dehydrogenase [Legionella moravica]	acyl-CoA dehydrogenase [Legionella longbeachae]	acyl-CoA dehydrogenase [Legionella sainthelensi]
WP_025385501.1	lpari_00432	WP_028387127.1	WP_035889515.1	WP_028389552.1	WP_028374313.1	WP_018577491.1	WP_031564577.1	YP_094907.1	WP_006869076.1	WP_019234380.1	WP_028379908.1	WP_028385170.1	WP_012979316.1	WP_027271587.1	peptide chain release factor 3 [Legionella oakridgensis]	Peptide chain release factor 3	peptide chain release factor 3 [Legionella geestiana]	peptide chain release factor 3 [Legionella norrlandica]	peptide chain release factor 3 [Legionella fairfieldensis]	peptide chain release factor 3 [Legionella lansingensis]	peptide chain release factor 3 [Legionella shakespearei]	peptide chain release factor 3 [Legionella wadsworthii]	peptide chain release factor 3 [Legionella pneumophila subsp. pneumophila str. Philadelphia 1]	peptide chain release factor 3 [Legionella drancourtii]	peptide chain release factor 3 [Legionella anisa]	peptide chain release factor 3 [Legionella cherrii]	peptide chain release factor 3 [Legionella moravica]	peptide chain release factor 3 [Legionella longbeachae]	peptide chain release factor 3 [Legionella sainthelensi]
WP_025385503.1	lpari_00434	WP_028387132.1	WP_035889514.1	WP_028389665.1	WP_028374316.1	WP_018577488.1	WP_031564582.1	YP_094909.1	WP_006869074.1	WP_019234382.1	WP_028379910.1	WP_028385172.1	WP_003635813.1	WP_027271584.1	NAD synthetase [Legionella oakridgensis]	NAD(P) transhydrogenase subunit beta	NAD synthetase [Legionella geestiana]	NAD synthetase [Legionella norrlandica]	NAD synthetase [Legionella fairfieldensis]	NAD synthetase [Legionella lansingensis]	NAD synthetase [Legionella shakespearei]	NAD synthetase [Legionella wadsworthii]	NAD(P) transhydrogenase subunit beta [Legionella pneumophila subsp. pneumophila str. Philadelphia 1]	NAD synthetase [Legionella drancourtii]	NAD synthetase [Legionella anisa]	NAD synthetase [Legionella cherrii]	NAD synthetase [Legionella moravica]	NAD synthetase [Legionella longbeachae]	NAD synthetase [Legionella sainthelensi]
WP_025385504.1	lpari_00435	WP_028387133.1	WP_035889513.1	WP_028389664.1	WP_028374317.1	WP_018577487.1	WP_031564584.1	YP_094910.1	WP_040534046.1	WP_019234383.1	WP_028379911.1	WP_028385173.1	WP_003635814.1	WP_027271583.1	pyridine nucleotide transhydrogenase [Legionella oakridgensis]	NAD(P) transhydrogenase subunit alpha	pyridine nucleotide transhydrogenase [Legionella geestiana]	pyridine nucleotide transhydrogenase [Legionella norrlandica]	pyridine nucleotide transhydrogenase [Legionella fairfieldensis]	pyridine nucleotide transhydrogenase [Legionella lansingensis]	NAD(P) transhydrogenase subunit beta [Legionella shakespearei]	pyridine nucleotide transhydrogenase [Legionella wadsworthii]	NAD(P) transhydrogenase subunit beta [Legionella pneumophila subsp. pneumophila str. Philadelphia 1]	pyridine nucleotide transhydrogenase [Legionella drancourtii]	NAD(P) transhydrogenase subunit beta [Legionella anisa]	pyridine nucleotide transhydrogenase [Legionella cherrii]	pyridine nucleotide transhydrogenase [Legionella moravica]	NAD(P) transhydrogenase subunit beta [Legionella longbeachae]	pyridine nucleotide transhydrogenase [Legionella sainthelensi]
WP_025385505.1	lpari_00436	WP_028387134.1	WP_035889508.1	WP_028389663.1	WP_028374318.1	WP_018577486.1	WP_031564585.1	YP_094911.1	WP_006869072.1	WP_019234384.1	WP_028379912.1	WP_028385174.1	WP_003635816.1	WP_027271582.1	NAD(P) transhydrogenase subunit alpha [Legionella oakridgensis]	NAD(P) transhydrogenase subunit alpha part 1	hypothetical protein [Legionella geestiana]	NAD(P) transhydrogenase subunit alpha [Legionella norrlandica]	NAD(P) transhydrogenase subunit alpha [Legionella fairfieldensis]	NAD(P) transhydrogenase subunit alpha [Legionella lansingensis]	pyridine nucleotide transhydrogenase subunit alpha [Legionella shakespearei]	NAD(P) transhydrogenase subunit alpha [Legionella wadsworthii]	pyridine nucleotide transhydrogenase subunit alpha [Legionella pneumophila subsp. pneumophila str. Philadelphia 1]	hypothetical protein [Legionella drancourtii]	pyridine nucleotide transhydrogenase subunit alpha [Legionella anisa]	NAD(P) transhydrogenase subunit alpha [Legionella cherrii]	NAD(P) transhydrogenase subunit alpha [Legionella moravica]	NAD(P) transhydrogenase subunit alpha [Legionella longbeachae]	NAD(P) transhydrogenase subunit alpha [Legionella sainthelensi]
WP_025385510.1	lpari_02505	WP_028386349.1	WP_035888716.1	WP_028389661.1	WP_028374322.1	WP_018575819.1	WP_031565258.1	YP_095922.1	WP_006871560.1	WP_019231994.1	WP_028380230.1	WP_028384243.1	WP_003632036.1	WP_035905788.1	multidrug DMT transporter permease [Legionella oakridgensis]	hypothetical protein	hypothetical protein [Legionella geestiana]	multidrug DMT transporter permease [Legionella norrlandica]	multidrug DMT transporter permease [Legionella fairfieldensis]	multidrug DMT transporter permease [Legionella lansingensis]	hypothetical protein [Legionella shakespearei]	multidrug DMT transporter permease [Legionella wadsworthii]	ectonucleoside triphosphate diphosphohydrolase I [Legionella pneumophila subsp. pneumophila str. Philadelphia 1]	multidrug DMT transporter permease [Legionella drancourtii]	multidrug DMT transporter permease [Legionella anisa]	multidrug DMT transporter permease [Legionella cherrii]	multidrug DMT transporter permease [Legionella moravica]	multidrug DMT transporter permease [Legionella longbeachae]	multidrug DMT transporter permease [Legionella sainthelensi]
WP_025385552.1	lpari_00654	WP_028387307.1	WP_035886306.1	WP_028388590.1	WP_035915843.1	WP_018576593.1	WP_031565583.1	YP_095460.1	WP_006871914.1	WP_019232199.1	WP_028380421.1	WP_028384541.1	WP_003636982.1	WP_027269912.1	hypothetical protein [Legionella oakridgensis]	hypothetical protein	hypothetical protein [Legionella geestiana]	hypothetical protein [Legionella norrlandica]	hypothetical protein [Legionella fairfieldensis]	hypothetical protein [Legionella lansingensis]	hypothetical protein [Legionella shakespearei]	hypothetical protein [Legionella wadsworthii]	hypothetical protein lpg1431 [Legionella pneumophila subsp. pneumophila str. Philadelphia 1]	hypothetical protein [Legionella drancourtii]	hypothetical protein [Legionella anisa]	hypothetical protein [Legionella cherrii]	hypothetical protein [Legionella moravica]	hypothetical protein [Legionella longbeachae]	hypothetical protein [Legionella sainthelensi]
WP_025385616.1	lpari_01586	WP_028386802.1	WP_035890218.1	WP_028389648.1	WP_028372229.1	WP_018575774.1	WP_031563856.1	YP_094151.1	WP_006870307.1	WP_019233828.1	WP_028382300.1	WP_028384060.1	WP_003631943.1	WP_027271673.1	hypothetical protein [Legionella oakridgensis]	hypothetical protein	hypothetical protein [Legionella geestiana]	alkylphosphonate utilization protein [Legionella norrlandica]	hypothetical protein [Legionella fairfieldensis]	hypothetical protein [Legionella lansingensis]	hypothetical protein [Legionella shakespearei]	hypothetical protein [Legionella wadsworthii]	alkylphosphonate uptake protein PhnA [Legionella pneumophila subsp. pneumophila str. Philadelphia 1]	hypothetical protein [Legionella drancourtii]	hypothetical protein [Legionella anisa]	hypothetical protein [Legionella cherrii]	hypothetical protein [Legionella moravica]	hypothetical protein [Legionella longbeachae]	hypothetical protein [Legionella sainthelensi]
WP_025385619.1	lpari_03272	WP_028386967.1	WP_035888667.1	WP_028388822.1	WP_028374185.1	WP_018577031.1	WP_031567539.1	YP_095210.1	WP_006870289.1	WP_019235442.1	WP_028382026.1	WP_028385028.1	WP_003632296.1	WP_027271559.1	riboflavin biosynthesis protein RibD [Legionella oakridgensis]	Riboflavin biosynthesis protein RibD	riboflavin biosynthesis protein RibD [Legionella geestiana]	riboflavin biosynthesis protein RibD [Legionella norrlandica]	riboflavin biosynthesis protein RibD [Legionella fairfieldensis]	riboflavin biosynthesis protein RibD [Legionella lansingensis]	hypothetical protein [Legionella shakespearei]	riboflavin biosynthesis protein RibD [Legionella wadsworthii]	riboflavin biosynthesis protein RibD [Legionella pneumophila subsp. pneumophila str. Philadelphia 1]	riboflavin biosynthesis protein RibD [Legionella drancourtii]	riboflavin biosynthesis protein RibD [Legionella anisa]	riboflavin biosynthesis protein RibD [Legionella cherrii]	riboflavin biosynthesis protein RibD [Legionella moravica]	riboflavin biosynthesis protein RibD [Legionella longbeachae]	riboflavin biosynthesis protein RibD [Legionella sainthelensi]
WP_025385620.1	lpari_03351	WP_028386968.1	WP_035888665.1	WP_028388821.1	WP_028374184.1	WP_018577030.1	WP_051635569.1	YP_095211.1	WP_006872564.1	WP_040522181.1	WP_028382480.1	WP_028385029.1	WP_012978754.1	WP_027272470.1	riboflavin synthase subunit alpha [Legionella oakridgensis]	Riboflavin synthase	riboflavin synthase subunit alpha [Legionella geestiana]	riboflavin synthase subunit alpha [Legionella norrlandica]	riboflavin synthase subunit alpha [Legionella fairfieldensis]	riboflavin synthase subunit alpha [Legionella lansingensis]	riboflavin synthase subunit alpha [Legionella shakespearei]	riboflavin synthase subunit alpha [Legionella wadsworthii]	riboflavin synthase subunit alpha [Legionella pneumophila subsp. pneumophila str. Philadelphia 1]	riboflavin synthase subunit alpha [Legionella drancourtii]	riboflavin synthase subunit alpha [Legionella anisa]	riboflavin synthase subunit alpha [Legionella cherrii]	riboflavin synthase subunit alpha [Legionella moravica]	riboflavin synthase subunit alpha [Legionella longbeachae]	riboflavin synthase subunit alpha [Legionella sainthelensi]
WP_025385622.1	lpari_03269	WP_028386971.1	WP_035888661.1	WP_028388817.1	WP_028374178.1	WP_018577026.1	WP_031567534.1	YP_095215.1	WP_006870286.1	WP_019235439.1	WP_028382023.1	WP_028385033.1	WP_003632293.1	WP_027271562.1	2-dehydro-3-deoxyphosphooctonate aldolase [Legionella oakridgensis]	2-dehydro-3-deoxyphosphooctonate aldolase	2-dehydro-3-deoxyphosphooctonate aldolase [Legionella geestiana]	2-dehydro-3-deoxyphosphooctonate aldolase [Legionella norrlandica]	2-dehydro-3-deoxyphosphooctonate aldolase [Legionella fairfieldensis]	2-dehydro-3-deoxyphosphooctonate aldolase [Legionella lansingensis]	2-dehydro-3-deoxyphosphooctonate aldolase [Legionella shakespearei]	2-dehydro-3-deoxyphosphooctonate aldolase [Legionella wadsworthii]	2-dehydro-3-deoxyphosphooctonate aldolase [Legionella pneumophila subsp. pneumophila str. Philadelphia 1]	2-dehydro-3-deoxyphosphooctonate aldolase [Legionella drancourtii]	2-dehydro-3-deoxyphosphooctonate aldolase [Legionella anisa]	2-dehydro-3-deoxyphosphooctonate aldolase [Legionella cherrii]	2-dehydro-3-deoxyphosphooctonate aldolase [Legionella moravica]	2-dehydro-3-deoxyphosphooctonate aldolase [Legionella longbeachae]	2-dehydro-3-deoxyphosphooctonate aldolase [Legionella sainthelensi]
WP_025385623.1	lpari_01729	WP_028386975.1	WP_035888659.1	WP_028389574.1	WP_028373151.1	WP_018577020.1	WP_031565316.1	YP_095218.1	WP_006871629.1	WP_019232033.1	WP_028380269.1	WP_028385034.1	WP_003631977.1	WP_027271646.1	competence protein ComL [Legionella oakridgensis]	Outer membrane protein assembly factor BamD	competence protein ComL [Legionella geestiana]	competence protein ComL [Legionella norrlandica]	competence protein ComL [Legionella fairfieldensis]	competence protein ComL [Legionella lansingensis]	competence lipoprotein ComL [Legionella shakespearei]	competence protein ComL [Legionella wadsworthii]	competence lipoprotein ComL [Legionella pneumophila subsp. pneumophila str. Philadelphia 1]	hypothetical protein [Legionella drancourtii]	competence lipoprotein ComL [Legionella anisa]	competence protein ComL [Legionella cherrii]	competence protein ComL [Legionella moravica]	competence lipoprotein ComL [Legionella longbeachae]	competence protein ComL [Legionella sainthelensi]
WP_025385626.1	lpari_01730	WP_028386977.1	WP_035888658.1	WP_051555264.1	WP_028373150.1	WP_018577018.1	WP_031565318.1	YP_095219.1	WP_006869539.1	WP_019232035.1	WP_028380270.1	WP_028385035.1	WP_003631975.1	WP_027271647.1	recombinase [Legionella oakridgensis]	Recombination-associated protein RdgC	recombinase [Legionella geestiana]	recombinase [Legionella norrlandica]	recombinase [Legionella fairfieldensis]	recombinase [Legionella lansingensis]	recombinase [Legionella shakespearei]	recombinase [Legionella wadsworthii]	recombination associated protein [Legionella pneumophila subsp. pneumophila str. Philadelphia 1]	recombinase [Legionella drancourtii]	recombinase [Legionella anisa]	recombinase [Legionella cherrii]	recombinase [Legionella moravica]	recombinase [Legionella longbeachae]	recombinase [Legionella sainthelensi]
WP_025385629.1	lpari_02769	WP_028386979.1	WP_035887072.1	WP_028389570.1	WP_028373138.1	WP_018577456.1	WP_031567895.1	YP_094938.1	WP_006869824.1	WP_019233735.1	WP_028382215.1	WP_028385209.1	WP_003632505.1	WP_027270981.1	isochorismatase [Legionella oakridgensis]	hypothetical protein	isochorismatase [Legionella geestiana]	isochorismatase [Legionella norrlandica]	isochorismatase [Legionella fairfieldensis]	isochorismatase [Legionella lansingensis]	hypothetical protein [Legionella shakespearei]	isochorismatase [Legionella wadsworthii]	isochorismatase superfamily hydrolase [Legionella pneumophila subsp. pneumophila str. Philadelphia 1]	isochorismatase [Legionella drancourtii]	isochorismatase [Legionella anisa]	isochorismatase [Legionella cherrii]	isochorismatase [Legionella moravica]	isochorismatase [Legionella longbeachae]	isochorismatase [Legionella sainthelensi]
WP_025385630.1	lpari_02768	WP_028386980.1	WP_035887073.1	WP_028389569.1	WP_028373137.1	WP_018577454.1	WP_031567893.1	YP_094939.1	WP_006869825.1	WP_019233734.1	WP_028382214.1	WP_028385210.1	WP_003632504.1	WP_027270980.1	3-hydroxy-2-methylbutyryl-CoA dehydrogenase [Legionella oakridgensis]	putative oxidoreductase	3-hydroxy-2-methylbutyryl-CoA dehydrogenase [Legionella geestiana]	3-hydroxy-2-methylbutyryl-CoA dehydrogenase [Legionella norrlandica]	3-hydroxy-2-methylbutyryl-CoA dehydrogenase [Legionella fairfieldensis]	3-hydroxy-2-methylbutyryl-CoA dehydrogenase [Legionella lansingensis]	3-hydroxy-2-methylbutyryl-CoA dehydrogenase [Legionella shakespearei]	3-hydroxy-2-methylbutyryl-CoA dehydrogenase [Legionella wadsworthii]	3-oxoacyl-ACP reductase [Legionella pneumophila subsp. pneumophila str. Philadelphia 1]	3-hydroxy-2-methylbutyryl-CoA dehydrogenase [Legionella drancourtii]	3-hydroxy-2-methylbutyryl-CoA dehydrogenase [Legionella anisa]	3-hydroxy-2-methylbutyryl-CoA dehydrogenase [Legionella cherrii]	3-hydroxy-2-methylbutyryl-CoA dehydrogenase [Legionella moravica]	3-hydroxy-2-methylbutyryl-CoA dehydrogenase [Legionella longbeachae]	3-hydroxy-2-methylbutyryl-CoA dehydrogenase [Legionella sainthelensi]
WP_025385667.1	lpari_02898	WP_051550846.1	WP_035891571.1	WP_028389537.1	WP_028373691.1	WP_018578201.1	WP_031565950.1	YP_095625.1	WP_040535762.1	WP_019232455.1	WP_028380673.1	WP_028384727.1	WP_003636944.1	WP_027269884.1	crotonase [Legionella oakridgensis]	Fatty acid oxidation complex subunit alpha	crotonase [Legionella geestiana]	crotonase [Legionella norrlandica]	crotonase [Legionella fairfieldensis]	crotonase [Legionella lansingensis]	crotonase [Legionella shakespearei]	crotonase [Legionella wadsworthii]	enoyl CoA hydratase [Legionella pneumophila subsp. pneumophila str. Philadelphia 1]	crotonase [Legionella drancourtii]	crotonase [Legionella anisa]	crotonase [Legionella cherrii]	crotonase [Legionella moravica]	crotonase [Legionella longbeachae]	crotonase [Legionella sainthelensi]
WP_025385670.1	lpari_02894	WP_028386133.1	WP_035887879.1	WP_028389534.1	WP_028373696.1	WP_018578205.1	WP_031565942.1	YP_095621.1	WP_006871755.1	WP_019232451.1	WP_028380670.1	WP_028384723.1	WP_003636949.1	WP_027269887.1	30S ribosomal protein S6 [Legionella oakridgensis]	30S ribosomal protein S6	30S ribosomal protein S6 [Legionella geestiana]	30S ribosomal protein S6 [Legionella norrlandica]	30S ribosomal protein S6 [Legionella fairfieldensis]	30S ribosomal protein S6 [Legionella lansingensis]	30S ribosomal protein S6 [Legionella shakespearei]	30S ribosomal protein S6 [Legionella wadsworthii]	30S ribosomal protein S6 [Legionella pneumophila subsp. pneumophila str. Philadelphia 1]	30S ribosomal protein S6 [Legionella drancourtii]	30S ribosomal protein S6 [Legionella anisa]	30S ribosomal protein S6 [Legionella cherrii]	30S ribosomal protein S6 [Legionella moravica]	30S ribosomal protein S6 [Legionella longbeachae]	30S ribosomal protein S6 [Legionella sainthelensi]
WP_025385673.1	lpari_02891	WP_028386135.1	WP_035887870.1	WP_028389531.1	WP_028373699.1	WP_018578208.1	WP_031565936.1	YP_095618.1	WP_006871758.1	WP_019232449.1	WP_028380668.1	WP_028384721.1	WP_003636952.1	WP_027269889.1	50S ribosomal protein L9 [Legionella oakridgensis]	50S ribosomal protein L9	50S ribosomal protein L9 [Legionella geestiana]	50S ribosomal protein L9 [Legionella norrlandica]	50S ribosomal protein L9 [Legionella fairfieldensis]	50S ribosomal protein L9 [Legionella lansingensis]	50S ribosomal protein L9 [Legionella shakespearei]	50S ribosomal protein L9 [Legionella wadsworthii]	50S ribosomal protein L9 [Legionella pneumophila subsp. pneumophila str. Philadelphia 1]	50S ribosomal protein L9 [Legionella drancourtii]	50S ribosomal protein L9 [Legionella anisa]	50S ribosomal protein L9 [Legionella cherrii]	50S ribosomal protein L9 [Legionella moravica]	50S ribosomal protein L9 [Legionella longbeachae]	50S ribosomal protein L9 [Legionella sainthelensi]
WP_025385676.1	lpari_03063	WP_028386138.1	WP_035887867.1	WP_028387857.1	WP_028373703.1	WP_018578210.1	WP_031566644.1	YP_095616.1	WP_006870067.1	WP_019232599.1	WP_028381516.1	WP_028384719.1	WP_003634060.1	WP_027270486.1	hypothetical protein [Legionella oakridgensis]	Thiol-disulfide oxidoreductase ResA	hypothetical protein [Legionella geestiana]	thioredoxin [Legionella norrlandica]	hypothetical protein [Legionella fairfieldensis]	hypothetical protein [Legionella lansingensis]	alkyl hydroperoxide reductase [Legionella shakespearei]	alkyl hydroperoxide reductase [Legionella wadsworthii]	hypothetical protein lpg1587 [Legionella pneumophila subsp. pneumophila str. Philadelphia 1]	alkyl hydroperoxide reductase [Legionella drancourtii]	alkyl hydroperoxide reductase [Legionella anisa]	alkyl hydroperoxide reductase [Legionella cherrii]	thioredoxin [Legionella moravica]	alkyl hydroperoxide reductase [Legionella longbeachae]	alkyl hydroperoxide reductase [Legionella sainthelensi]
WP_025385678.1	lpari_02889	WP_028386139.1	WP_035887864.1	WP_028387859.1	WP_028373705.1	WP_018578211.1	WP_031565933.1	YP_095614.1	WP_006871767.1	WP_019232446.1	WP_028380666.1	WP_028384717.1	WP_003636954.1	WP_035905647.1	enhanced entry protein EnhB [Legionella oakridgensis]	hypothetical protein	enhanced entry protein EnhB [Legionella geestiana]	enhanced entry protein EnhB [Legionella norrlandica]	enhanced entry protein EnhB [Legionella fairfieldensis]	enhanced entry protein EnhB [Legionella lansingensis]	enhanced entry protein EnhB [Legionella shakespearei]	enhanced entry protein EnhB [Legionella wadsworthii]	hypothetical protein lpg1585 [Legionella pneumophila subsp. pneumophila str. Philadelphia 1]	enhanced entry protein EnhB [Legionella drancourtii]	enhanced entry protein EnhB [Legionella anisa]	enhanced entry protein EnhB [Legionella cherrii]	enhanced entry protein EnhB [Legionella moravica]	enhanced entry protein EnhB [Legionella longbeachae]	enhanced entry protein EnhB [Legionella sainthelensi]
WP_025385682.1	lpari_02885	WP_028386145.1	WP_052117551.1	WP_028387865.1	WP_035915792.1	WP_018578217.1	WP_031565925.1	YP_095608.1	WP_006871771.1	WP_019232442.1	WP_028380662.1	WP_028384711.1	WP_035904704.1	WP_027269765.1	hypothetical protein [Legionella oakridgensis]	tRNA-modifying protein YgfZ	hypothetical protein [Legionella geestiana]	glycine cleavage system protein T [Legionella norrlandica]	hypothetical protein [Legionella fairfieldensis]	hypothetical protein [Legionella lansingensis]	hypothetical protein [Legionella shakespearei]	glycine cleavage system protein T [Legionella wadsworthii]	glycine cleavage T protein [Legionella pneumophila subsp. pneumophila str. Philadelphia 1]	glycine cleavage system protein T [Legionella drancourtii]	glycine cleavage system protein T [Legionella anisa]	glycine cleavage system protein T [Legionella cherrii]	glycine cleavage system protein T [Legionella moravica]	glycine cleavage system protein T [Legionella longbeachae]	glycine cleavage system protein T [Legionella sainthelensi]
WP_025385685.1	lpari_00301	WP_051550851.1	WP_035888369.1	WP_028387653.1	WP_028373384.1	WP_018578156.1	WP_031565728.1	YP_095688.1	WP_006872846.1	WP_019232285.1	WP_028380506.1	WP_028383470.1	WP_003637099.1	WP_027270007.1	hypothetical protein [Legionella oakridgensis]	hypothetical protein	hypothetical protein [Legionella geestiana]	membrane protein [Legionella norrlandica]	hypothetical protein [Legionella fairfieldensis]	hypothetical protein [Legionella lansingensis]	hypothetical protein [Legionella shakespearei]	membrane protein [Legionella wadsworthii]	hypothetical protein lpg1661 [Legionella pneumophila subsp. pneumophila str. Philadelphia 1]	membrane protein [Legionella drancourtii]	membrane protein [Legionella anisa]	membrane protein [Legionella cherrii]	membrane protein [Legionella moravica]	membrane protein [Legionella longbeachae]	membrane protein [Legionella sainthelensi]
WP_025385686.1	lpari_02880	WP_028386148.1	WP_035887849.1	WP_028387868.1	WP_028373713.1	WP_018578224.1	WP_031565916.1	YP_095605.1	WP_006871776.1	WP_019232437.1	WP_028380657.1	WP_028384705.1	WP_003631718.1	WP_027269772.1	ATP-dependent DNA helicase RuvB [Legionella oakridgensis]	Holliday junction ATP-dependent DNA helicase RuvB	ATP-dependent DNA helicase RuvB [Legionella geestiana]	ATP-dependent DNA helicase RuvB [Legionella norrlandica]	ATP-dependent DNA helicase RuvB [Legionella fairfieldensis]	ATP-dependent DNA helicase RuvB [Legionella lansingensis]	Holliday junction DNA helicase RuvB [Legionella shakespearei]	ATP-dependent DNA helicase RuvB [Legionella wadsworthii]	Holliday junction DNA helicase RuvB [Legionella pneumophila subsp. pneumophila str. Philadelphia 1]	Holliday junction DNA helicase RuvB [Legionella drancourtii]	Holliday junction DNA helicase RuvB [Legionella anisa]	ATP-dependent DNA helicase RuvB [Legionella cherrii]	ATP-dependent DNA helicase RuvB [Legionella moravica]	Holliday junction DNA helicase RuvB [Legionella longbeachae]	ATP-dependent DNA helicase RuvB [Legionella sainthelensi]
WP_025385688.1	lpari_02878	WP_028386149.1	WP_035887894.1	WP_028387869.1	WP_028373715.1	WP_018578226.1	WP_031565912.1	YP_095603.1	WP_006871778.1	WP_019232435.1	WP_028380655.1	WP_028384703.1	WP_003631716.1	WP_027269774.1	colicin transporter [Legionella oakridgensis]	Biopolymer transport protein ExbB	colicin transporter [Legionella geestiana]	colicin transporter [Legionella norrlandica]	colicin transporter [Legionella fairfieldensis]	colicin transporter [Legionella lansingensis]	colicin transporter [Legionella shakespearei]	colicin transporter [Legionella wadsworthii]	biopolymer transport protein TolQ [Legionella pneumophila subsp. pneumophila str. Philadelphia 1]	colicin transporter [Legionella drancourtii]	colicin transporter [Legionella anisa]	colicin transporter [Legionella cherrii]	colicin transporter [Legionella moravica]	colicin transporter [Legionella longbeachae]	colicin transporter [Legionella sainthelensi]
WP_025385689.1	lpari_02877	WP_028386150.1	WP_035887845.1	WP_028387870.1	WP_028373716.1	WP_018578227.1	WP_031565910.1	YP_095602.1	WP_006871779.1	WP_019232434.1	WP_028380654.1	WP_028384702.1	WP_003631715.1	WP_027269775.1	biopolymer transporter TolR [Legionella oakridgensis]	Biopolymer transport protein ExbD	biopolymer transporter TolR [Legionella geestiana]	biopolymer transporter TolR [Legionella norrlandica]	biopolymer transporter TolR [Legionella fairfieldensis]	biopolymer transporter TolR [Legionella lansingensis]	biopolymer transporter ExbD [Legionella shakespearei]	biopolymer transporter TolR [Legionella wadsworthii]	biopolymer transport protein TolR [Legionella pneumophila subsp. pneumophila str. Philadelphia 1]	biopolymer transporter ExbD [Legionella drancourtii]	biopolymer transporter ExbD [Legionella anisa]	biopolymer transporter TolR [Legionella cherrii]	biopolymer transporter TolR [Legionella moravica]	biopolymer transporter ExbD [Legionella longbeachae]	biopolymer transporter TolR [Legionella sainthelensi]
WP_025385690.1	lpari_02876	WP_028386151.1	WP_035887842.1	WP_028387871.1	WP_028373717.1	WP_018578228.1	WP_031565908.1	YP_095601.1	WP_006871780.1	WP_019232433.1	WP_028380653.1	WP_028384701.1	WP_012979078.1	WP_027269776.1	energy transducer TonB [Legionella oakridgensis]	hypothetical protein	energy transducer TonB [Legionella geestiana]	energy transducer TonB [Legionella norrlandica]	energy transducer TonB [Legionella fairfieldensis]	energy transducer TonB [Legionella lansingensis]	cell envelope biogenesis protein TonB [Legionella shakespearei]	energy transducer TonB [Legionella wadsworthii]	TolA colicin import membrane protein [Legionella pneumophila subsp. pneumophila str. Philadelphia 1]	cell envelope biogenesis protein TonB [Legionella drancourtii]	cell envelope biogenesis protein TonB [Legionella anisa]	energy transducer TonB [Legionella cherrii]	energy transducer TonB [Legionella moravica]	cell envelope biogenesis protein TonB [Legionella longbeachae]	energy transducer TonB [Legionella sainthelensi]
WP_025385691.1	lpari_02875	WP_051550848.1	WP_035887840.1	WP_035917970.1	WP_051546199.1	WP_018578229.1	WP_031565906.1	YP_095600.1	WP_006871781.1	WP_019232432.1	WP_028380652.1	WP_028384700.1	WP_003631714.1	WP_027269777.1	translocation protein TolB [Legionella oakridgensis]	Protein TolB	translocation protein TolB [Legionella geestiana]	translocation protein TolB [Legionella norrlandica]	translocation protein TolB [Legionella fairfieldensis]	translocation protein TolB [Legionella lansingensis]	translocation protein TolB [Legionella shakespearei]	translocation protein TolB [Legionella wadsworthii]	TolB colicin import protein [Legionella pneumophila subsp. pneumophila str. Philadelphia 1]	translocation protein TolB [Legionella drancourtii]	translocation protein TolB [Legionella anisa]	translocation protein TolB [Legionella cherrii]	translocation protein TolB [Legionella moravica]	translocation protein TolB [Legionella longbeachae]	translocation protein TolB [Legionella sainthelensi]
WP_025385695.1	lpari_02871	WP_028386156.1	WP_035890629.1	WP_028388799.1	WP_028373722.1	WP_018578234.1	WP_031565897.1	YP_095588.1	WP_006871786.1	WP_019232425.1	WP_028380648.1	WP_028384695.1	WP_003631709.1	WP_027269783.1	2-oxoisovalerate dehydrogenase [Legionella oakridgensis]	Pyruvate dehydrogenase E1 component subunit beta	2-oxoisovalerate dehydrogenase [Legionella geestiana]	2-oxoisovalerate dehydrogenase [Legionella norrlandica]	2-oxoisovalerate dehydrogenase [Legionella fairfieldensis]	2-oxoisovalerate dehydrogenase [Legionella lansingensis]	2-oxoisovalerate dehydrogenase subunit beta [Legionella shakespearei]	2-oxoisovalerate dehydrogenase [Legionella wadsworthii]	pyruvate dehydrogenase E1 beta subunit [Legionella pneumophila subsp. pneumophila str. Philadelphia 1]	2-oxoisovalerate dehydrogenase subunit beta [Legionella drancourtii]	2-oxoisovalerate dehydrogenase subunit beta [Legionella anisa]	2-oxoisovalerate dehydrogenase [Legionella cherrii]	2-oxoisovalerate dehydrogenase [Legionella moravica]	2-oxoisovalerate dehydrogenase subunit beta [Legionella longbeachae]	2-oxoisovalerate dehydrogenase [Legionella sainthelensi]
WP_025385696.1	lpari_02870	WP_028386157.1	WP_035890628.1	WP_028388798.1	WP_028373723.1	WP_018578235.1	WP_031565895.1	YP_095587.1	WP_006871787.1	WP_019232424.1	WP_028380647.1	WP_028384694.1	WP_003631708.1	WP_027269784.1	ABC transporter permease [Legionella oakridgensis]	Pyruvate dehydrogenase E1 component subunit alpha	ABC transporter permease [Legionella geestiana]	ABC transporter permease [Legionella norrlandica]	ABC transporter permease [Legionella fairfieldensis]	ABC transporter permease [Legionella lansingensis]	ABC transporter permease [Legionella shakespearei]	ABC transporter permease [Legionella wadsworthii]	pyruvate dehydrogenase E1 alpha subunit [Legionella pneumophila subsp. pneumophila str. Philadelphia 1]	ABC transporter permease [Legionella drancourtii]	ABC transporter permease [Legionella anisa]	ABC transporter permease [Legionella cherrii]	ABC transporter permease [Legionella moravica]	ABC transporter permease [Legionella longbeachae]	ABC transporter permease [Legionella sainthelensi]
WP_025385697.1	lpari_02869	WP_051550823.1	WP_035890635.1	WP_028388797.1	WP_051546197.1	WP_026254024.1	WP_031565893.1	YP_095586.1	WP_040535771.1	WP_019232423.1	WP_028380646.1	WP_028384692.1	WP_003631707.1	WP_027269785.1	aminodeoxychorismate synthase [Legionella oakridgensis]	Aminodeoxychorismate synthase component 1	hypothetical protein [Legionella geestiana]	aminodeoxychorismate synthase [Legionella norrlandica]	aminodeoxychorismate synthase [Legionella fairfieldensis]	aminodeoxychorismate synthase [Legionella lansingensis]	aminodeoxychorismate synthase [Legionella shakespearei]	aminodeoxychorismate synthase [Legionella wadsworthii]	para-aminobenzoate synthase, component I [Legionella pneumophila subsp. pneumophila str. Philadelphia 1]	aminodeoxychorismate synthase [Legionella drancourtii]	aminodeoxychorismate synthase component I [Legionella anisa]	aminodeoxychorismate synthase [Legionella cherrii]	aminodeoxychorismate synthase [Legionella moravica]	aminodeoxychorismate synthase [Legionella longbeachae]	aminodeoxychorismate synthase [Legionella sainthelensi]
WP_025385699.1	lpari_02867	WP_028387091.1	WP_035890625.1	WP_028388793.1	WP_028372928.1	WP_018578240.1	WP_031565888.1	YP_095583.1	WP_006871791.1	WP_019232421.1	WP_028380644.1	WP_028384684.1	WP_003631704.1	WP_027269787.1	long-chain fatty acid--CoA ligase [Legionella oakridgensis]	Long-chain-fatty-acid--CoA ligase	long-chain fatty acid--CoA ligase [Legionella geestiana]	long-chain fatty acid--CoA ligase [Legionella norrlandica]	long-chain fatty acid--CoA ligase [Legionella fairfieldensis]	long-chain fatty acid--CoA ligase [Legionella lansingensis]	long-chain fatty acid--CoA ligase [Legionella shakespearei]	long-chain fatty acid--CoA ligase [Legionella wadsworthii]	long chain fatty acid-CoA ligase [Legionella pneumophila subsp. pneumophila str. Philadelphia 1]	long-chain fatty acid--CoA ligase [Legionella drancourtii]	long-chain fatty acid--CoA ligase [Legionella anisa]	long-chain fatty acid--CoA ligase [Legionella cherrii]	long-chain fatty acid--CoA ligase [Legionella moravica]	long-chain fatty acid--CoA ligase [Legionella longbeachae]	long-chain fatty acid--CoA ligase [Legionella sainthelensi]
WP_025385700.1	lpari_02866	WP_028387092.1	WP_035890624.1	WP_028388792.1	WP_028372929.1	WP_018578241.1	WP_031565886.1	YP_095582.1	WP_006871792.1	WP_019232420.1	WP_028380643.1	WP_035922114.1	WP_003631703.1	WP_027269788.1	septum site-determining protein MinC [Legionella oakridgensis]	Septum site-determining protein MinC	septum site-determining protein MinC [Legionella geestiana]	septum site-determining protein MinC [Legionella norrlandica]	septum site-determining protein MinC [Legionella fairfieldensis]	septum site-determining protein MinC [Legionella lansingensis]	septum site-determining protein MinC [Legionella shakespearei]	septum site-determining protein MinC [Legionella wadsworthii]	septum site determining protein MinC [Legionella pneumophila subsp. pneumophila str. Philadelphia 1]	septum site-determining protein MinC [Legionella drancourtii]	septum site-determining protein MinC [Legionella anisa]	septum site-determining protein MinC [Legionella cherrii]	septum site-determining protein MinC [Legionella moravica]	septum site-determining protein MinC [Legionella longbeachae]	septum site-determining protein MinC [Legionella sainthelensi]
WP_025385701.1	lpari_02865	WP_028387093.1	WP_035890623.1	WP_028388791.1	WP_028372930.1	WP_018578242.1	WP_031565884.1	YP_095581.1	WP_006871793.1	WP_019232419.1	WP_028380642.1	WP_028384682.1	WP_003631702.1	WP_027269789.1	UDP-2,3-diacylglucosamine hydrolase [Legionella oakridgensis]	UDP-2,3-diacylglucosamine hydrolase	hypothetical protein [Legionella geestiana]	UDP-2,3-diacylglucosamine hydrolase [Legionella norrlandica]	UDP-2,3-diacylglucosamine hydrolase [Legionella fairfieldensis]	UDP-2,3-diacylglucosamine hydrolase [Legionella lansingensis]	hypothetical protein [Legionella shakespearei]	UDP-2,3-diacylglucosamine hydrolase [Legionella wadsworthii]	UDP-2,3-diacylglucosamine hydrolase [Legionella pneumophila subsp. pneumophila str. Philadelphia 1]	UDP-2,3-diacylglucosamine hydrolase [Legionella drancourtii]	UDP-2,3-diacylglucosamine hydrolase [Legionella anisa]	UDP-2,3-diacylglucosamine hydrolase [Legionella cherrii]	UDP-2,3-diacylglucosamine hydrolase [Legionella moravica]	UDP-2,3-diacylglucosamine hydrolase [Legionella longbeachae]	UDP-2,3-diacylglucosamine hydrolase [Legionella sainthelensi]
WP_025385705.1	lpari_02861	WP_028387095.1	WP_035891323.1	WP_028388788.1	WP_028372933.1	WP_018578245.1	WP_031565878.1	YP_095578.1	WP_006871796.1	WP_019232416.1	WP_028380639.1	WP_028384680.1	WP_003631699.1	WP_027269792.1	hypothetical protein [Legionella oakridgensis]	hypothetical protein	hypothetical protein [Legionella geestiana]	hypothetical protein [Legionella norrlandica]	hypothetical protein [Legionella fairfieldensis]	hypothetical protein [Legionella lansingensis]	hypothetical protein [Legionella shakespearei]	hypothetical protein [Legionella wadsworthii]	hypothetical protein lpg1549 [Legionella pneumophila subsp. pneumophila str. Philadelphia 1]	hypothetical protein [Legionella drancourtii]	hypothetical protein [Legionella anisa]	hypothetical protein [Legionella cherrii]	hypothetical protein [Legionella moravica]	hypothetical protein [Legionella longbeachae]	hypothetical protein [Legionella sainthelensi]
WP_025385706.1	lpari_02859	WP_028387096.1	WP_035891322.1	WP_028388787.1	WP_028372934.1	WP_018578246.1	WP_031565876.1	YP_095577.1	WP_006871799.1	WP_019232415.1	WP_028380638.1	WP_028384679.1	WP_003631698.1	WP_027269793.1	nucleoside diphosphate kinase [Legionella oakridgensis]	Nucleoside diphosphate kinase	nucleoside diphosphate kinase [Legionella geestiana]	nucleoside diphosphate kinase [Legionella norrlandica]	nucleoside diphosphate kinase [Legionella fairfieldensis]	nucleoside diphosphate kinase [Legionella lansingensis]	nucleoside diphosphate kinase [Legionella shakespearei]	nucleoside diphosphate kinase [Legionella wadsworthii]	nucleoside diphosphate kinase [Legionella pneumophila subsp. pneumophila str. Philadelphia 1]	nucleoside diphosphate kinase [Legionella drancourtii]	nucleoside diphosphate kinase [Legionella anisa]	nucleoside diphosphate kinase [Legionella cherrii]	nucleoside diphosphate kinase [Legionella moravica]	nucleoside diphosphate kinase [Legionella longbeachae]	nucleoside diphosphate kinase [Legionella sainthelensi]
WP_025385708.1	lpari_02856	WP_028387097.1	WP_035891320.1	WP_028388783.1	WP_028372937.1	WP_018578249.1	WP_031565871.1	YP_095574.1	WP_006871802.1	WP_019232412.1	WP_028380635.1	WP_028384676.1	WP_003631695.1	WP_027269796.1	DNA-binding protein [Legionella oakridgensis]	Cytoskeleton protein RodZ	hypothetical protein [Legionella geestiana]	DNA-binding protein [Legionella norrlandica]	DNA-binding protein [Legionella fairfieldensis]	DNA-binding protein [Legionella lansingensis]	hypothetical protein [Legionella shakespearei]	DNA-binding protein [Legionella wadsworthii]	DNA-binding protein [Legionella pneumophila subsp. pneumophila str. Philadelphia 1]	DNA-binding protein [Legionella drancourtii]	DNA-binding protein [Legionella anisa]	DNA-binding protein [Legionella cherrii]	DNA-binding protein [Legionella moravica]	DNA-binding protein [Legionella longbeachae]	DNA-binding protein [Legionella sainthelensi]
WP_025385709.1	lpari_02855	WP_028387098.1	WP_035891318.1	WP_028388782.1	WP_028372938.1	WP_018578250.1	WP_031565869.1	YP_095573.1	WP_006871803.1	WP_019232411.1	WP_028380634.1	WP_028384675.1	WP_003631694.1	WP_027269797.1	histidyl-tRNA synthetase [Legionella oakridgensis]	Histidine--tRNA ligase	histidyl-tRNA synthetase [Legionella geestiana]	histidyl-tRNA synthetase [Legionella norrlandica]	histidyl-tRNA synthetase [Legionella fairfieldensis]	histidyl-tRNA synthetase [Legionella lansingensis]	histidyl-tRNA synthetase [Legionella shakespearei]	histidyl-tRNA synthetase [Legionella wadsworthii]	histidyl-tRNA synthetase [Legionella pneumophila subsp. pneumophila str. Philadelphia 1]	histidyl-tRNA synthetase [Legionella drancourtii]	histidyl-tRNA synthetase [Legionella anisa]	histidyl-tRNA synthetase [Legionella cherrii]	histidyl-tRNA synthetase [Legionella moravica]	histidyl-tRNA synthetase [Legionella longbeachae]	histidyl-tRNA synthetase [Legionella sainthelensi]
WP_025385711.1	lpari_02853	WP_051551024.1	WP_035891314.1	WP_028388780.1	WP_028372939.1	WP_018578252.1	WP_031565865.1	YP_095571.1	WP_006871805.1	WP_019232409.1	WP_028380632.1	WP_028384673.1	WP_003631692.1	WP_027269799.1	dehydrogenase [Legionella oakridgensis]	Outer membrane protein assembly factor BamB	dehydrogenase [Legionella geestiana]	dehydrogenase [Legionella norrlandica]	dehydrogenase [Legionella fairfieldensis]	dehydrogenase [Legionella lansingensis]	dehydrogenase [Legionella shakespearei]	dehydrogenase [Legionella wadsworthii]	PQQ WD-40-like repeat-containing protein [Legionella pneumophila subsp. pneumophila str. Philadelphia 1]	dehydrogenase [Legionella drancourtii]	dehydrogenase [Legionella anisa]	dehydrogenase [Legionella cherrii]	dehydrogenase [Legionella moravica]	dehydrogenase [Legionella longbeachae]	dehydrogenase [Legionella sainthelensi]
WP_025385743.1	lpari_03594	WP_028385751.1	WP_035890429.1	WP_028389039.1	WP_028373546.1	WP_018576947.1	WP_031567326.1	YP_095306.1	WP_006870163.1	WP_019233189.1	WP_028381933.1	WP_028384405.1	WP_012978996.1	WP_027270342.1	electron transfer flavoprotein-ubiquinone oxidoreductase [Legionella oakridgensis]	Electron transfer flavoprotein-ubiquinone oxidoreductase	electron transfer flavoprotein-ubiquinone oxidoreductase [Legionella geestiana]	electron transfer flavoprotein-ubiquinone oxidoreductase [Legionella norrlandica]	electron transfer flavoprotein-ubiquinone oxidoreductase [Legionella fairfieldensis]	electron transfer flavoprotein-ubiquinone oxidoreductase [Legionella lansingensis]	electron transfer flavoprotein [Legionella shakespearei]	electron transfer flavoprotein-ubiquinone oxidoreductase [Legionella wadsworthii]	electron transferring flavoprotein dehydrogenase [Legionella pneumophila subsp. pneumophila str. Philadelphia 1]	electron transfer flavoprotein [Legionella drancourtii]	electron transfer flavoprotein [Legionella anisa]	electron transfer flavoprotein-ubiquinone oxidoreductase [Legionella cherrii]	electron transfer flavoprotein-ubiquinone oxidoreductase [Legionella moravica]	electron transfer flavoprotein [Legionella longbeachae]	electron transfer flavoprotein-ubiquinone oxidoreductase [Legionella sainthelensi]
WP_025385744.1	lpari_00596	WP_051550895.1	WP_035888808.1	WP_028387664.1	WP_028373682.1	WP_018576867.1	WP_031565488.1	YP_095401.1	WP_040535701.1	WP_019232139.1	WP_028380365.1	WP_028384480.1	WP_003631774.1	WP_027269725.1	UDP-N-acetyl-D-glucosamine dehydrogenase [Legionella oakridgensis]	scyllo-inositol 2-dehydrogenase (NAD(+))	UDP-N-acetyl-D-glucosamine dehydrogenase [Legionella geestiana]	UDP-N-acetyl-D-glucosamine dehydrogenase [Legionella norrlandica]	UDP-N-acetyl-D-glucosamine dehydrogenase [Legionella fairfieldensis]	UDP-N-acetyl-D-glucosamine dehydrogenase [Legionella lansingensis]	UDP-N-acetylglucosamine 3-dehydrogenase [Legionella shakespearei]	UDP-N-acetyl-D-glucosamine dehydrogenase [Legionella wadsworthii]	oxidoreductase [Legionella pneumophila subsp. pneumophila str. Philadelphia 1]	UDP-N-acetyl-D-glucosamine dehydrogenase [Legionella drancourtii]	UDP-N-acetylglucosamine 3-dehydrogenase [Legionella anisa]	UDP-N-acetyl-D-glucosamine dehydrogenase [Legionella cherrii]	UDP-N-acetyl-D-glucosamine dehydrogenase [Legionella moravica]	UDP-N-acetylglucosamine 3-dehydrogenase [Legionella longbeachae]	UDP-N-acetyl-D-glucosamine dehydrogenase [Legionella sainthelensi]
WP_025385745.1	lpari_00595	WP_028386366.1	WP_035888735.1	WP_028387665.1	WP_028373683.1	WP_018576868.1	WP_031565486.1	YP_095400.1	WP_006871677.1	WP_019232138.1	WP_028380364.1	WP_028384479.1	WP_003631775.1	WP_027269724.1	lipid-A-disaccharide synthase [Legionella oakridgensis]	Lipid-A-disaccharide synthase	lipid-A-disaccharide synthase [Legionella geestiana]	lipid-A-disaccharide synthase [Legionella norrlandica]	lipid-A-disaccharide synthase [Legionella fairfieldensis]	lipid-A-disaccharide synthase [Legionella lansingensis]	lipid-A-disaccharide synthase [Legionella shakespearei]	lipid-A-disaccharide synthase [Legionella wadsworthii]	lipid-A-disaccharide synthase [Legionella pneumophila subsp. pneumophila str. Philadelphia 1]	lipid-A-disaccharide synthase [Legionella drancourtii]	lipid-A-disaccharide synthase [Legionella anisa]	lipid-A-disaccharide synthase [Legionella cherrii]	lipid-A-disaccharide synthase [Legionella moravica]	lipid-A-disaccharide synthase [Legionella longbeachae]	lipid-A-disaccharide synthase [Legionella sainthelensi]
WP_025385750.1	lpari_00586	WP_028387189.1	WP_035888741.1	WP_028387671.1	WP_028374026.1	WP_018576875.1	WP_031565471.1	YP_095392.1	WP_006869683.1	WP_019232130.1	WP_028380356.1	WP_028384473.1	WP_003631788.1	WP_027269715.1	type II secretion system protein GspF [Legionella oakridgensis]	Type II secretion system protein F	type II secretion system protein GspF [Legionella geestiana]	type II secretion system protein GspF [Legionella norrlandica]	type II secretion system protein GspF [Legionella fairfieldensis]	type II secretion system protein GspF [Legionella lansingensis]	type II secretion system protein GspF [Legionella shakespearei]	type II secretion system protein GspF [Legionella wadsworthii]	type II secretory pathway protein LspF [Legionella pneumophila subsp. pneumophila str. Philadelphia 1]	type II secretion system protein GspF [Legionella drancourtii]	type II secretion system protein GspF [Legionella anisa]	type II secretion system protein GspF [Legionella cherrii]	type II secretion system protein GspF [Legionella moravica]	type II secretion system protein GspF [Legionella longbeachae]	type II secretion system protein GspF [Legionella sainthelensi]
WP_025385751.1	lpari_00585	WP_028387188.1	WP_035888747.1	WP_028387672.1	WP_028374025.1	WP_026253904.1	WP_031565469.1	YP_095391.1	WP_006869682.1	WP_019232129.1	WP_028380355.1	WP_028384472.1	WP_012979061.1	WP_027269714.1	type II secretion system protein GspG [Legionella oakridgensis]	Type II secretion system protein G	type II secretion system protein GspG [Legionella geestiana]	type II secretion system protein GspG [Legionella norrlandica]	type II secretion system protein GspG [Legionella fairfieldensis]	type II secretion system protein GspG [Legionella lansingensis]	type II secretion system protein GspG [Legionella shakespearei]	type II secretion system protein GspG [Legionella wadsworthii]	type II secretory pathway protein LspG [Legionella pneumophila subsp. pneumophila str. Philadelphia 1]	type II secretion system protein GspG [Legionella drancourtii]	type II secretion system protein GspG [Legionella anisa]	type II secretion system protein GspG [Legionella cherrii]	type II secretion system protein GspG [Legionella moravica]	type II secretion system protein GspG [Legionella longbeachae]	type II secretion system protein GspG [Legionella sainthelensi]
WP_025385753.1	lpari_00583	WP_028387186.1	WP_052117582.1	WP_051555067.1	WP_028374023.1	WP_018576878.1	WP_031565465.1	YP_095389.1	WP_006869680.1	WP_051045681.1	WP_028380353.1	WP_028384470.1	WP_003631792.1	WP_027269712.1	type II secretion system protein GspI [Legionella oakridgensis]	hypothetical protein	type II secretion system protein GspI [Legionella geestiana]	type II secretory pathway protein LspI [Legionella norrlandica]	type II secretory pathway protein LspI [Legionella fairfieldensis]	type II secretion system protein GspI [Legionella lansingensis]	type II secretion system protein GspI [Legionella shakespearei]	type II secretion system protein GspI [Legionella wadsworthii]	type II secretory pathway protein LspI [Legionella pneumophila subsp. pneumophila str. Philadelphia 1]	type II secretion system protein GspI [Legionella drancourtii]	type II secretory pathway protein LspI [Legionella anisa]	type II secretion system protein GspI [Legionella cherrii]	type II secretion system protein GspI [Legionella moravica]	type II secretion system protein GspI [Legionella longbeachae]	type II secretion system protein GspI [Legionella sainthelensi]
WP_025385754.1	lpari_00582	WP_035903695.1	WP_035888749.1	WP_028387674.1	WP_028374022.1	WP_018576879.1	WP_031565463.1	YP_095388.1	WP_006869679.1	WP_019232126.1	WP_028380352.1	WP_028384469.1	WP_003631793.1	WP_027269711.1	type II secretion system protein GspJ [Legionella oakridgensis]	Type II secretion system protein J	type II secretion system protein GspJ [Legionella geestiana]	type II secretion system protein GspJ [Legionella norrlandica]	type II secretion system protein GspJ [Legionella fairfieldensis]	type II secretion system protein GspJ [Legionella lansingensis]	type II secretion system protein GspJ [Legionella shakespearei]	type II secretion system protein GspJ [Legionella wadsworthii]	type II secretory pathway protein LspJ [Legionella pneumophila subsp. pneumophila str. Philadelphia 1]	type II secretion system protein GspJ [Legionella drancourtii]	type II secretion system protein GspJ [Legionella anisa]	type II secretion system protein GspJ [Legionella cherrii]	type II secretion system protein GspJ [Legionella moravica]	type II secretion system protein GspJ [Legionella longbeachae]	type II secretion system protein GspJ [Legionella sainthelensi]
WP_025385757.1	lpari_00580	WP_028387117.1	WP_035888751.1	WP_028388777.1	WP_028374018.1	WP_018576882.1	WP_031565460.1	YP_095385.1	WP_006869674.1	WP_019232124.1	WP_028380350.1	WP_028384467.1	WP_003631795.1	WP_027269709.1	hypothetical protein [Legionella oakridgensis]	Putative beta-lactamase HcpD	hypothetical protein [Legionella geestiana]	hypothetical protein [Legionella norrlandica]	hypothetical protein [Legionella fairfieldensis]	hypothetical protein [Legionella lansingensis]	hypothetical protein [Legionella shakespearei]	hypothetical protein [Legionella wadsworthii]	hypothetical protein lpg1356 [Legionella pneumophila subsp. pneumophila str. Philadelphia 1]	hypothetical protein [Legionella drancourtii]	hypothetical protein [Legionella anisa]	hypothetical protein [Legionella cherrii]	hypothetical protein [Legionella moravica]	hypothetical protein [Legionella longbeachae]	hypothetical protein [Legionella sainthelensi]
WP_025385758.1	lpari_01106	WP_028387374.1	WP_035891131.1	WP_028387656.1	WP_028373639.1	WP_018576281.1	WP_031565130.1	YP_096010.1	WP_040535585.1	WP_040522430.1	WP_028380187.1	WP_028385312.1	WP_003631913.1	WP_027271696.1	membrane protein [Legionella oakridgensis]	Membrane-bound lytic murein transglycosylase A	hypothetical protein [Legionella geestiana]	membrane protein [Legionella norrlandica]	membrane protein [Legionella fairfieldensis]	membrane protein [Legionella lansingensis]	membrane protein [Legionella shakespearei]	membrane protein [Legionella wadsworthii]	hypothetical protein lpg1994 [Legionella pneumophila subsp. pneumophila str. Philadelphia 1]	membrane protein [Legionella drancourtii]	membrane protein [Legionella anisa]	membrane protein [Legionella cherrii]	membrane protein [Legionella moravica]	membrane protein [Legionella longbeachae]	membrane protein [Legionella sainthelensi]
WP_025385760.1	lpari_00188	WP_051550933.1	WP_035886886.1	WP_028388092.1	WP_028373857.1	WP_018578472.1	WP_031563591.1	YP_096610.1	WP_040536231.1	WP_040522492.1	WP_028380963.1	WP_028383186.1	WP_003635208.1	WP_051544685.1	hypothetical protein [Legionella oakridgensis]	hypothetical protein	hypothetical protein [Legionella geestiana]	hypothetical protein [Legionella norrlandica]	hypothetical protein [Legionella fairfieldensis]	hypothetical protein [Legionella lansingensis]	hypothetical protein [Legionella shakespearei]	hypothetical protein [Legionella wadsworthii]	hypothetical protein lpg2605 [Legionella pneumophila subsp. pneumophila str. Philadelphia 1]	hypothetical protein [Legionella drancourtii]	hypothetical protein [Legionella anisa]	hypothetical protein [Legionella cherrii]	hypothetical protein [Legionella moravica]	hypothetical protein [Legionella longbeachae]	hypothetical protein [Legionella sainthelensi]
WP_025385761.1	lpari_02089	WP_028387116.1	WP_035888753.1	WP_028387920.1	WP_028374015.1	WP_018576884.1	WP_031566178.1	YP_095382.1	WP_006872750.1	WP_019233118.1	WP_028381867.1	WP_028384466.1	WP_003636110.1	WP_027270183.1	acetyl-CoA acetyltransferase [Legionella oakridgensis]	3-ketoacyl-CoA thiolase	acetyl-CoA acetyltransferase [Legionella geestiana]	acetyl-CoA acetyltransferase [Legionella norrlandica]	acetyl-CoA acetyltransferase [Legionella fairfieldensis]	acetyl-CoA acetyltransferase [Legionella lansingensis]	acetyl-CoA acetyltransferase [Legionella shakespearei]	acetyl-CoA acetyltransferase [Legionella wadsworthii]	acetyl-CoA acetyltransferase [Legionella pneumophila subsp. pneumophila str. Philadelphia 1]	acetyl-CoA acetyltransferase [Legionella drancourtii]	acetyl-CoA acetyltransferase [Legionella anisa]	acetyl-CoA acetyltransferase [Legionella cherrii]	acetyl-CoA acetyltransferase [Legionella moravica]	acetyl-CoA acetyltransferase [Legionella longbeachae]	acetyl-CoA acetyltransferase [Legionella sainthelensi]
WP_025385769.1	lpari_02076	WP_028387108.1	WP_035888770.1	WP_028387828.1	WP_028374153.1	WP_018576894.1	WP_031566200.1	YP_095372.1	WP_006872739.1	WP_019233129.1	WP_028381878.1	WP_028384456.1	WP_003636097.1	WP_027270195.1	hypothetical protein [Legionella oakridgensis]	Cell division protein DedD	hypothetical protein [Legionella geestiana]	sporulation protein [Legionella norrlandica]	hypothetical protein [Legionella fairfieldensis]	hypothetical protein [Legionella lansingensis]	hypothetical protein [Legionella shakespearei]	sporulation protein [Legionella wadsworthii]	hypothetical protein lpg1343 [Legionella pneumophila subsp. pneumophila str. Philadelphia 1]	sporulation protein [Legionella drancourtii]	hypothetical protein [Legionella anisa]	sporulation protein [Legionella cherrii]	sporulation protein [Legionella moravica]	sporulation protein [Legionella longbeachae]	sporulation protein [Legionella sainthelensi]
WP_025385775.1	lpari_00676	WP_028387083.1	WP_035886092.1	WP_028387821.1	WP_028372984.1	WP_026253983.1	WP_031565626.1	YP_095537.1	WP_006872934.1	WP_019232221.1	WP_028380442.1	WP_028384628.1	WP_003637007.1	WP_027269933.1	lipoprotein [Legionella oakridgensis]	RlpA-like protein	lipoprotein [Legionella geestiana]	lipoprotein [Legionella norrlandica]	lipoprotein [Legionella fairfieldensis]	lipoprotein [Legionella lansingensis]	lipoprotein [Legionella shakespearei]	lipoprotein [Legionella wadsworthii]	rare lipoprotein A [Legionella pneumophila subsp. pneumophila str. Philadelphia 1]	hypothetical protein [Legionella drancourtii]	hypothetical protein [Legionella anisa]	lipoprotein [Legionella cherrii]	lipoprotein [Legionella moravica]	hypothetical protein [Legionella longbeachae]	lipoprotein [Legionella sainthelensi]
WP_025385782.1	lpari_03524	WP_028386175.1	WP_035887803.1	WP_028387812.1	WP_028372972.1	WP_018577807.1	WP_031565795.1	YP_095548.1	WP_006871873.1	WP_019232340.1	WP_028380558.1	WP_028384640.1	WP_003631618.1	WP_027269856.1	hypoxanthine-guanine phosphoribosyltransferase [Legionella oakridgensis]	Hypoxanthine-guanine phosphoribosyltransferase	hypoxanthine-guanine phosphoribosyltransferase [Legionella geestiana]	hypoxanthine-guanine phosphoribosyltransferase [Legionella norrlandica]	hypoxanthine-guanine phosphoribosyltransferase [Legionella fairfieldensis]	hypoxanthine-guanine phosphoribosyltransferase [Legionella lansingensis]	hypoxanthine phosphoribosyltransferase [Legionella shakespearei]	hypoxanthine-guanine phosphoribosyltransferase [Legionella wadsworthii]	hypoxanthine-guanine phosphoribosyltransferase [Legionella pneumophila subsp. pneumophila str. Philadelphia 1]	hypoxanthine phosphoribosyltransferase [Legionella drancourtii]	hypoxanthine phosphoribosyltransferase [Legionella anisa]	hypoxanthine-guanine phosphoribosyltransferase [Legionella cherrii]	hypoxanthine-guanine phosphoribosyltransferase [Legionella moravica]	hypoxanthine phosphoribosyltransferase [Legionella longbeachae]	hypoxanthine-guanine phosphoribosyltransferase [Legionella sainthelensi]
WP_025385785.1	lpari_03528	WP_051551064.1	WP_035887797.1	WP_028387810.1	WP_028372968.1	WP_018577810.1	WP_051635534.1	YP_095551.1	WP_040535822.1	WP_019232345.1	WP_028380562.1	WP_028384643.1	WP_003631623.1	WP_027269852.1	type IV-A pilus assembly ATPase PilB [Legionella oakridgensis]	Type II secretion system protein E	hypothetical protein [Legionella geestiana]	type IV-A pilus assembly ATPase PilB [Legionella norrlandica]	general secretion pathway protein GspE [Legionella fairfieldensis]	general secretion pathway protein GspE [Legionella lansingensis]	type IV-A pilus assembly ATPase PilB [Legionella shakespearei]	type IV-A pilus assembly ATPase PilB [Legionella wadsworthii]	(type IV) pilus assembly protein PilB [Legionella pneumophila subsp. pneumophila str. Philadelphia 1]	type IV-A pilus assembly ATPase PilB [Legionella drancourtii]	type IV-A pilus assembly ATPase PilB [Legionella anisa]	type IV-A pilus assembly ATPase PilB [Legionella cherrii]	type IV-A pilus assembly ATPase PilB [Legionella moravica]	type IV-A pilus assembly ATPase PilB [Legionella longbeachae]	type IV-A pilus assembly ATPase PilB [Legionella sainthelensi]
WP_025385786.1	lpari_03529	WP_028387372.1	WP_035887886.1	WP_028387809.1	WP_028372967.1	WP_018577811.1	WP_031565801.1	YP_095552.1	WP_040535842.1	WP_019232346.1	WP_028380563.1	WP_028384644.1	WP_003631624.1	WP_027269851.1	type II secretion system protein F [Legionella oakridgensis]	Type II secretion system protein F	hypothetical protein [Legionella geestiana]	type II secretion system protein F [Legionella norrlandica]	type II secretion system protein F [Legionella fairfieldensis]	type II secretion system protein F [Legionella lansingensis]	type II secretion system protein F [Legionella shakespearei]	type II secretion system protein F [Legionella wadsworthii]	(type IV) pilus assembly protein PilC [Legionella pneumophila subsp. pneumophila str. Philadelphia 1]	type II secretion system protein F [Legionella drancourtii]	type II secretion system protein F [Legionella anisa]	type II secretion system protein F [Legionella cherrii]	type II secretion system protein F [Legionella moravica]	type II secretion system protein F [Legionella longbeachae]	type II secretion system protein F [Legionella sainthelensi]
WP_025385787.1	lpari_03530	WP_028387373.1	WP_035887794.1	WP_028387808.1	WP_028372966.1	WP_018577812.1	WP_031565802.1	YP_095553.1	WP_006871867.1	WP_019232347.1	WP_028380564.1	WP_028384645.1	WP_003631625.1	WP_027269850.1	methyltransferase [Legionella oakridgensis]	Type 4 prepilin-like proteins leader peptide-processing enzyme	hypothetical protein [Legionella geestiana]	methyltransferase [Legionella norrlandica]	methyltransferase [Legionella fairfieldensis]	methyltransferase [Legionella lansingensis]	N-methyltransferase [Legionella shakespearei]	methyltransferase [Legionella wadsworthii]	type 4 (IV) prepilin-like protein leader peptide processing enzyme PilD [Legionella pneumophila subsp. pneumophila str. Philadelphia 1]	N-methyltransferase [Legionella drancourtii]	N-methyltransferase [Legionella anisa]	methyltransferase [Legionella cherrii]	methyltransferase [Legionella moravica]	N-methyltransferase [Legionella longbeachae]	methyltransferase [Legionella sainthelensi]
WP_025385789.1	lpari_01814	WP_028386354.1	WP_035887792.1	WP_028388499.1	WP_035915296.1	WP_018578270.1	WP_031565836.1	YP_095555.1	WP_006871822.1	WP_019232390.1	WP_028380611.1	WP_028384646.1	WP_003631657.1	WP_027269823.1	hypothetical protein [Legionella oakridgensis]	hypothetical protein	hypothetical protein [Legionella geestiana]	hypothetical protein [Legionella norrlandica]	hypothetical protein [Legionella fairfieldensis]	hypothetical protein [Legionella lansingensis]	hypothetical protein [Legionella shakespearei]	hypothetical protein [Legionella wadsworthii]	hypothetical protein lpg1526 [Legionella pneumophila subsp. pneumophila str. Philadelphia 1]	hypothetical protein [Legionella drancourtii]	hypothetical protein [Legionella anisa]	hypothetical protein [Legionella cherrii]	hypothetical protein [Legionella moravica]	hypothetical protein [Legionella longbeachae]	hypothetical protein [Legionella sainthelensi]
WP_025385790.1	lpari_01816	WP_028386471.1	WP_035887787.1	WP_028388501.1	WP_028372962.1	WP_018578268.1	WP_031565838.1	YP_095557.1	WP_006871820.1	WP_019232392.1	WP_028380613.1	WP_028384648.1	WP_003631659.1	WP_027269821.1	PEP synthetase regulatory protein [Legionella oakridgensis]	Phosphoenolpyruvate synthase regulatory protein	PEP synthetase regulatory protein [Legionella geestiana]	PEP synthetase regulatory protein [Legionella norrlandica]	PEP synthetase regulatory protein [Legionella fairfieldensis]	PEP synthetase regulatory protein [Legionella lansingensis]	PEP synthetase regulatory protein [Legionella shakespearei]	PEP synthetase regulatory protein [Legionella wadsworthii]	hypothetical protein lpg1528 [Legionella pneumophila subsp. pneumophila str. Philadelphia 1]	hypothetical protein [Legionella drancourtii]	PEP synthetase regulatory protein [Legionella anisa]	PEP synthetase regulatory protein [Legionella cherrii]	PEP synthetase regulatory protein [Legionella moravica]	hypothetical protein [Legionella longbeachae]	PEP synthetase regulatory protein [Legionella sainthelensi]
WP_025385792.1	lpari_01819	WP_028386469.1	WP_035887769.1	WP_028389491.1	WP_028372958.1	WP_018578266.1	WP_031565841.1	YP_095559.1	WP_006871819.1	WP_019232395.1	WP_028380617.1	WP_028384652.1	WP_003631662.1	WP_027269818.1	methylcitrate synthase [Legionella oakridgensis]	2-methylcitrate synthase	methylcitrate synthase [Legionella geestiana]	methylcitrate synthase [Legionella norrlandica]	methylcitrate synthase [Legionella fairfieldensis]	methylcitrate synthase [Legionella lansingensis]	methylcitrate synthase [Legionella shakespearei]	methylcitrate synthase [Legionella wadsworthii]	2-methylcitrate synthase [Legionella pneumophila subsp. pneumophila str. Philadelphia 1]	methylcitrate synthase [Legionella drancourtii]	methylcitrate synthase [Legionella anisa]	methylcitrate synthase [Legionella cherrii]	methylcitrate synthase [Legionella moravica]	methylcitrate synthase [Legionella longbeachae]	methylcitrate synthase [Legionella sainthelensi]
WP_025385794.1	lpari_01821	WP_051551013.1	WP_035887766.1	WP_028389495.1	WP_028372952.1	WP_018578263.1	WP_031565843.1	YP_095561.1	WP_006871817.1	WP_019232397.1	WP_028380619.1	WP_028384655.1	WP_012979086.1	WP_027269816.1	FAD-dependent cmnm(5)s(2)U34 oxidoreductase [Legionella oakridgensis]	tRNA 5-methylaminomethyl-2-thiouridine biosynthesis bifunctional protein MnmC	hypothetical protein [Legionella geestiana]	FAD-dependent cmnm(5)s(2)U34 oxidoreductase [Legionella norrlandica]	FAD-dependent cmnm(5)s(2)U34 oxidoreductase [Legionella fairfieldensis]	FAD-dependent cmnm(5)s(2)U34 oxidoreductase [Legionella lansingensis]	hypothetical protein [Legionella shakespearei]	FAD-dependent cmnm(5)s(2)U34 oxidoreductase [Legionella wadsworthii]	peptidase [Legionella pneumophila subsp. pneumophila str. Philadelphia 1]	FAD-dependent cmnm(5)s(2)U34 oxidoreductase [Legionella drancourtii]	FAD-dependent cmnm(5)s(2)U34 oxidoreductase [Legionella anisa]	FAD-dependent cmnm(5)s(2)U34 oxidoreductase [Legionella cherrii]	FAD-dependent cmnm(5)s(2)U34 oxidoreductase [Legionella moravica]	FAD-dependent cmnm(5)s(2)U34 oxidoreductase [Legionella longbeachae]	FAD-dependent cmnm(5)s(2)U34 oxidoreductase [Legionella sainthelensi]
WP_025385795.1	lpari_01823	WP_028387069.1	WP_035887762.1	WP_028389498.1	WP_028372946.1	WP_018578261.1	WP_031565845.1	YP_095563.1	WP_006871815.1	WP_019232399.1	WP_028380621.1	WP_028384657.1	WP_003631668.1	WP_027269814.1	glutamate-1-semialdehyde aminotransferase [Legionella oakridgensis]	Glutamate-1-semialdehyde 2,1-aminomutase	glutamate-1-semialdehyde aminotransferase [Legionella geestiana]	glutamate-1-semialdehyde aminotransferase [Legionella norrlandica]	glutamate-1-semialdehyde aminotransferase [Legionella fairfieldensis]	glutamate-1-semialdehyde aminotransferase [Legionella lansingensis]	glutamate-1-semialdehyde aminotransferase [Legionella shakespearei]	glutamate-1-semialdehyde aminotransferase [Legionella wadsworthii]	glutamate-1-semialdehyde aminotransferase [Legionella pneumophila subsp. pneumophila str. Philadelphia 1]	glutamate-1-semialdehyde aminotransferase [Legionella drancourtii]	glutamate-1-semialdehyde aminotransferase [Legionella anisa]	glutamate-1-semialdehyde aminotransferase [Legionella cherrii]	glutamate-1-semialdehyde aminotransferase [Legionella moravica]	glutamate-1-semialdehyde aminotransferase [Legionella longbeachae]	glutamate-1-semialdehyde aminotransferase [Legionella sainthelensi]
WP_025385797.1	lpari_01825	WP_028387067.1	WP_035887758.1	WP_028389500.1	WP_028372944.1	WP_018578259.1	WP_031565848.1	YP_095565.1	WP_006871813.1	WP_019232401.1	WP_028380622.1	WP_028384659.1	WP_003631670.1	WP_027269812.1	membrane protein [Legionella oakridgensis]	hypothetical protein	membrane protein [Legionella geestiana]	membrane protein [Legionella norrlandica]	membrane protein [Legionella fairfieldensis]	membrane protein [Legionella lansingensis]	membrane protein [Legionella shakespearei]	membrane protein [Legionella wadsworthii]	transmembrane protein [Legionella pneumophila subsp. pneumophila str. Philadelphia 1]	membrane protein [Legionella drancourtii]	membrane protein [Legionella anisa]	membrane protein [Legionella cherrii]	membrane protein [Legionella moravica]	membrane protein [Legionella longbeachae]	membrane protein [Legionella sainthelensi]
WP_025385798.1	lpari_01826	WP_028387066.1	WP_035887756.1	WP_028389501.1	WP_028372943.1	WP_018578258.1	WP_031565850.1	YP_095566.1	WP_006871812.1	WP_019232402.1	WP_028380623.1	WP_028384660.1	WP_012979084.1	WP_027269811.1	membrane protein [Legionella oakridgensis]	hypothetical protein	membrane protein [Legionella geestiana]	membrane protein [Legionella norrlandica]	membrane protein [Legionella fairfieldensis]	membrane protein [Legionella lansingensis]	membrane protein [Legionella shakespearei]	membrane protein [Legionella wadsworthii]	transporter [Legionella pneumophila subsp. pneumophila str. Philadelphia 1]	membrane protein [Legionella drancourtii]	membrane protein [Legionella anisa]	membrane protein [Legionella cherrii]	membrane protein [Legionella moravica]	membrane protein [Legionella longbeachae]	membrane protein [Legionella sainthelensi]
WP_025385800.1	lpari_02850	WP_028387333.1	WP_035891311.1	WP_028389506.1	WP_028372941.1	WP_018578254.1	WP_031565855.1	YP_095569.1	WP_006871807.1	WP_019232405.1	WP_028380626.1	WP_028384663.1	WP_003631677.1	WP_027269808.1	universal stress protein UspA [Legionella oakridgensis]	hypothetical protein	universal stress protein UspA [Legionella geestiana]	universal stress protein UspA [Legionella norrlandica]	universal stress protein UspA [Legionella fairfieldensis]	universal stress protein UspA [Legionella lansingensis]	universal stress protein A [Legionella shakespearei]	universal stress protein UspA [Legionella wadsworthii]	universal stress protein A [Legionella pneumophila subsp. pneumophila str. Philadelphia 1]	universal stress protein A [Legionella drancourtii]	universal stress protein A [Legionella anisa]	universal stress protein UspA [Legionella cherrii]	universal stress protein UspA [Legionella moravica]	universal stress protein A [Legionella longbeachae]	universal stress protein UspA [Legionella sainthelensi]
WP_025385811.1	lpari_00314	WP_028386692.1	WP_035888422.1	WP_028389510.1	WP_028373088.1	WP_018578132.1	WP_031565710.1	YP_095724.1	WP_006872871.1	WP_019232270.1	WP_028380493.1	WP_028383445.1	WP_003637084.1	WP_027269995.1	hypothetical protein [Legionella oakridgensis]	hypothetical protein	hypothetical protein [Legionella geestiana]	hypothetical protein [Legionella norrlandica]	hypothetical protein [Legionella fairfieldensis]	hypothetical protein [Legionella lansingensis]	hypothetical protein [Legionella shakespearei]	hypothetical protein [Legionella wadsworthii]	hypothetical protein lpg1697 [Legionella pneumophila subsp. pneumophila str. Philadelphia 1]	hypothetical protein [Legionella drancourtii]	hypothetical protein [Legionella anisa]	hypothetical protein [Legionella cherrii]	hypothetical protein [Legionella moravica]	hypothetical protein [Legionella longbeachae]	hypothetical protein [Legionella sainthelensi]
WP_025385814.1	lpari_00317	WP_051550944.1	WP_035888428.1	WP_028389513.1	WP_028373091.1	WP_026254014.1	WP_035899045.1	YP_095727.1	WP_050805602.1	WP_019232267.1	WP_035900455.1	WP_028383442.1	WP_003637080.1	WP_035905676.1	uracil-DNA glycosylase [Legionella oakridgensis]	Uracil-DNA glycosylase	uracil-DNA glycosylase [Legionella geestiana]	uracil-DNA glycosylase [Legionella norrlandica]	uracil-DNA glycosylase [Legionella fairfieldensis]	uracil-DNA glycosylase [Legionella lansingensis]	uracil-DNA glycosylase [Legionella shakespearei]	uracil-DNA glycosylase [Legionella wadsworthii]	uracil DNA glycosylase [Legionella pneumophila subsp. pneumophila str. Philadelphia 1]	uracil-DNA glycosylase [Legionella drancourtii]	uracil DNA glycosylase [Legionella anisa]	uracil-DNA glycosylase [Legionella cherrii]	uracil-DNA glycosylase [Legionella moravica]	uracil DNA glycosylase [Legionella longbeachae]	uracil-DNA glycosylase [Legionella sainthelensi]
WP_025385817.1	lpari_00322	WP_028386950.1	WP_035888439.1	WP_051555257.1	WP_051546148.1	WP_018577270.1	WP_031565698.1	YP_095733.1	WP_006872883.1	WP_019232263.1	WP_028380487.1	WP_028383438.1	WP_003637076.1	WP_027269987.1	arginine N-succinyltransferase [Legionella oakridgensis]	Arginine N-succinyltransferase subunit beta	arginine N-succinyltransferase [Legionella geestiana]	arginine N-succinyltransferase [Legionella norrlandica]	arginine N-succinyltransferase [Legionella fairfieldensis]	arginine N-succinyltransferase [Legionella lansingensis]	arginine N-succinyltransferase [Legionella shakespearei]	arginine N-succinyltransferase [Legionella wadsworthii]	arginine N-succinyltransferase subunit beta [Legionella pneumophila subsp. pneumophila str. Philadelphia 1]	arginine N-succinyltransferase [Legionella drancourtii]	arginine N-succinyltransferase [Legionella anisa]	arginine N-succinyltransferase [Legionella cherrii]	arginine N-succinyltransferase [Legionella moravica]	arginine N-succinyltransferase [Legionella longbeachae]	arginine N-succinyltransferase [Legionella sainthelensi]
WP_025385819.1	lpari_00481	WP_028386946.1	WP_035888448.1	WP_028389520.1	WP_028373097.1	WP_018577284.1	WP_031565689.1	YP_095738.1	WP_006872889.1	WP_019232258.1	WP_028380480.1	WP_028383431.1	WP_003637067.1	WP_027269978.1	ribosome recycling factor [Legionella oakridgensis]	Ribosome-recycling factor	ribosome recycling factor [Legionella geestiana]	ribosome recycling factor [Legionella norrlandica]	ribosome recycling factor [Legionella fairfieldensis]	ribosome recycling factor [Legionella lansingensis]	ribosome recycling factor [Legionella shakespearei]	ribosome recycling factor [Legionella wadsworthii]	ribosome recycling factor [Legionella pneumophila subsp. pneumophila str. Philadelphia 1]	ribosome recycling factor [Legionella drancourtii]	ribosome recycling factor [Legionella anisa]	ribosome recycling factor [Legionella cherrii]	ribosome recycling factor [Legionella moravica]	ribosome recycling factor [Legionella longbeachae]	ribosome recycling factor [Legionella sainthelensi]
WP_025385820.1	lpari_00480	WP_028386945.1	WP_035888450.1	WP_028389521.1	WP_028373098.1	WP_018577285.1	WP_031565687.1	YP_095739.1	WP_006872890.1	WP_019232257.1	WP_028380479.1	WP_028383430.1	WP_012979124.1	WP_027269977.1	uridylate kinase [Legionella oakridgensis]	Uridylate kinase	uridylate kinase [Legionella geestiana]	uridylate kinase [Legionella norrlandica]	uridylate kinase [Legionella fairfieldensis]	uridylate kinase [Legionella lansingensis]	uridylate kinase [Legionella shakespearei]	uridylate kinase [Legionella wadsworthii]	uridylate kinase [Legionella pneumophila subsp. pneumophila str. Philadelphia 1]	uridylate kinase [Legionella drancourtii]	uridylate kinase [Legionella anisa]	uridylate kinase [Legionella cherrii]	uridylate kinase [Legionella moravica]	uridylate kinase [Legionella longbeachae]	uridylate kinase [Legionella sainthelensi]
WP_025385822.1	lpari_00478	WP_028386943.1	WP_035888453.1	WP_028389523.1	WP_028373100.1	WP_018577287.1	WP_031565683.1	YP_095741.2	WP_006872892.1	WP_019232255.1	WP_028380477.1	WP_028383428.1	WP_003637063.1	WP_027269975.1	30S ribosomal protein S2 [Legionella oakridgensis]	30S ribosomal protein S2	30S ribosomal protein S2 [Legionella geestiana]	30S ribosomal protein S2 [Legionella norrlandica]	30S ribosomal protein S2 [Legionella fairfieldensis]	30S ribosomal protein S2 [Legionella lansingensis]	30S ribosomal protein S2 [Legionella shakespearei]	30S ribosomal protein S2 [Legionella wadsworthii]	30S ribosomal protein S2 [Legionella pneumophila subsp. pneumophila str. Philadelphia 1]	30S ribosomal protein S2 [Legionella drancourtii]	30S ribosomal protein S2 [Legionella anisa]	30S ribosomal protein S2 [Legionella cherrii]	30S ribosomal protein S2 [Legionella moravica]	30S ribosomal protein S2 [Legionella longbeachae]	30S ribosomal protein S2 [Legionella sainthelensi]
WP_025385825.1	lpari_02153	WP_028386935.1	WP_035887676.1	WP_028389528.1	WP_028373106.1	WP_018577399.1	WP_031566065.1	YP_095750.1	WP_006871741.1	WP_019233060.1	WP_028381810.1	WP_028383412.1	WP_003636263.1	WP_027270127.1	inosine-5-monophosphate dehydrogenase [Legionella oakridgensis]	Inosine-5'-monophosphate dehydrogenase	inosine-5-monophosphate dehydrogenase [Legionella geestiana]	inosine-5-monophosphate dehydrogenase [Legionella norrlandica]	inosine-5-monophosphate dehydrogenase [Legionella fairfieldensis]	inosine-5-monophosphate dehydrogenase [Legionella lansingensis]	inosine-5-monophosphate dehydrogenase [Legionella shakespearei]	inosine-5-monophosphate dehydrogenase [Legionella wadsworthii]	inosine-5'-monophosphate dehydrogenase [Legionella pneumophila subsp. pneumophila str. Philadelphia 1]	inosine-5-monophosphate dehydrogenase [Legionella drancourtii]	inosine-5-monophosphate dehydrogenase [Legionella anisa]	inosine-5-monophosphate dehydrogenase [Legionella cherrii]	inosine-5-monophosphate dehydrogenase [Legionella moravica]	inosine-5-monophosphate dehydrogenase [Legionella longbeachae]	inosine-5-monophosphate dehydrogenase [Legionella sainthelensi]
WP_025385826.1	lpari_02152	WP_028386934.1	WP_035887673.1	WP_028389529.1	WP_028373111.1	WP_018577397.1	WP_031566071.1	YP_095751.1	WP_006871739.1	WP_019233061.1	WP_028381811.1	WP_028383411.1	WP_012979276.1	WP_027270128.1	cell division inhibitor MinD [Legionella oakridgensis]	Septum site-determining protein MinD	cell division inhibitor MinD [Legionella geestiana]	cell division inhibitor MinD [Legionella norrlandica]	cell division inhibitor MinD [Legionella fairfieldensis]	cell division inhibitor MinD [Legionella lansingensis]	cell division inhibitor MinD [Legionella shakespearei]	cell division inhibitor MinD [Legionella wadsworthii]	septum site-determining protein MinD [Legionella pneumophila subsp. pneumophila str. Philadelphia 1]	cell division inhibitor MinD [Legionella drancourtii]	cell division inhibitor MinD [Legionella anisa]	cell division inhibitor MinD [Legionella cherrii]	cell division inhibitor MinD [Legionella moravica]	cell division inhibitor MinD [Legionella longbeachae]	cell division inhibitor MinD [Legionella sainthelensi]
WP_025385830.1	lpari_02147	WP_028386547.1	WP_035887669.1	WP_028388804.1	WP_028373118.1	WP_018577391.1	WP_031566080.1	YP_095753.1	WP_006872797.1	WP_019233065.1	WP_028381814.1	WP_028383406.1	WP_003636251.1	WP_027270132.1	hydrolase [Legionella oakridgensis]	hypothetical protein	hydrolase [Legionella geestiana]	hydrolase [Legionella norrlandica]	hydrolase [Legionella fairfieldensis]	hydrolase [Legionella lansingensis]	hydrolase [Legionella shakespearei]	hydrolase [Legionella wadsworthii]	hydrolase [Legionella pneumophila subsp. pneumophila str. Philadelphia 1]	hydrolase [Legionella drancourtii]	hydrolase [Legionella anisa]	hydrolase [Legionella cherrii]	hydrolase [Legionella moravica]	hydrolase [Legionella longbeachae]	hydrolase [Legionella sainthelensi]
WP_025385831.1	lpari_02146	WP_028386548.1	WP_035887667.1	WP_028388805.1	WP_028373119.1	WP_026253957.1	WP_031566082.1	YP_095754.1	WP_006872796.1	WP_019233066.1	WP_028381817.1	WP_028383405.1	WP_003636249.1	WP_027270133.1	hypothetical protein [Legionella oakridgensis]	hypothetical protein	hypothetical protein [Legionella geestiana]	hypothetical protein [Legionella norrlandica]	hypothetical protein [Legionella fairfieldensis]	hypothetical protein [Legionella lansingensis]	hypothetical protein [Legionella shakespearei]	hypothetical protein [Legionella wadsworthii]	hypothetical protein lpg1728 [Legionella pneumophila subsp. pneumophila str. Philadelphia 1]	hypothetical protein [Legionella drancourtii]	hypothetical protein [Legionella anisa]	hypothetical protein [Legionella cherrii]	hypothetical protein [Legionella moravica]	hypothetical protein [Legionella longbeachae]	hypothetical protein [Legionella sainthelensi]
WP_025385833.1	lpari_02141	WP_028386551.1	WP_035887658.1	WP_028388816.1	WP_028373125.1	WP_018576657.1	WP_031566091.1	YP_095759.1	WP_006872791.1	WP_040522258.1	WP_028381822.1	WP_028383400.1	WP_003636239.1,WP_012979197.1	WP_027270138.1	chloride channel protein [Legionella oakridgensis]	H(+)/Cl(-) exchange transporter ClcA	chloride channel protein [Legionella geestiana]	chloride channel protein [Legionella norrlandica]	chloride channel protein [Legionella fairfieldensis]	chloride channel protein [Legionella lansingensis]	chloride channel protein [Legionella shakespearei]	chloride channel protein [Legionella wadsworthii]	chloride channel protein [Legionella pneumophila subsp. pneumophila str. Philadelphia 1]	chloride channel protein [Legionella drancourtii]	chloride channel protein [Legionella anisa]	chloride channel protein [Legionella cherrii]	chloride channel protein [Legionella moravica]	NA	chloride channel protein [Legionella sainthelensi]
WP_025385838.1	lpari_02761	WP_028386983.1	WP_035887074.1	WP_028389564.1	WP_028373132.1	WP_018577449.1	WP_031567889.1	YP_094944.1	WP_006869830.1	WP_019233729.1	WP_028382209.1	WP_028384223.1	WP_003632501.1	WP_027270977.1	enhanced entry protein EnhA [Legionella oakridgensis]	hypothetical protein	enhanced entry protein EnhA [Legionella geestiana]	enhanced entry protein EnhA [Legionella norrlandica]	enhanced entry protein EnhA [Legionella fairfieldensis]	enhanced entry protein EnhA [Legionella lansingensis]	enhanced entry protein EnhA [Legionella shakespearei]	enhanced entry protein EnhA [Legionella wadsworthii]	enhanced entry protein EnhA [Legionella pneumophila subsp. pneumophila str. Philadelphia 1]	hypothetical protein [Legionella drancourtii]	enhanced entry protein EnhA [Legionella anisa]	enhanced entry protein EnhA [Legionella cherrii]	enhanced entry protein EnhA [Legionella moravica]	enhanced entry protein EnhA [Legionella longbeachae]	enhanced entry protein EnhA [Legionella sainthelensi]
WP_025385854.1	lpari_00459	WP_028387153.1	WP_035886198.1	WP_028387896.1	WP_028373368.1	WP_018578654.1	WP_031565648.1	YP_095489.1	WP_006872922.1	WP_019232234.1	WP_028380454.1	WP_028384567.1	WP_003637032.1	WP_027269953.1	hypothetical protein [Legionella oakridgensis]	hypothetical protein	hypothetical protein [Legionella geestiana]	hypothetical protein [Legionella norrlandica]	hypothetical protein [Legionella fairfieldensis]	hypothetical protein [Legionella lansingensis]	hypothetical protein [Legionella shakespearei]	hypothetical protein [Legionella wadsworthii]	hypothetical protein lpg1460 [Legionella pneumophila subsp. pneumophila str. Philadelphia 1]	hypothetical protein [Legionella drancourtii]	hypothetical protein [Legionella anisa]	hypothetical protein [Legionella cherrii]	hypothetical protein [Legionella moravica]	hypothetical protein [Legionella longbeachae]	hypothetical protein [Legionella sainthelensi]
WP_025385856.1	lpari_00457	WP_028387152.1	WP_035886204.1	WP_028387894.1	WP_028373370.1	WP_018578652.1	WP_031565644.1	YP_095487.1	WP_006872924.1	WP_019232232.1	WP_028380452.1	WP_028384565.1	WP_003637030.1	WP_027269951.1	hypothetical protein [Legionella oakridgensis]	hypothetical protein	hypothetical protein [Legionella geestiana]	hypothetical protein [Legionella norrlandica]	hypothetical protein [Legionella fairfieldensis]	hypothetical protein [Legionella lansingensis]	hypothetical protein [Legionella shakespearei]	hypothetical protein [Legionella wadsworthii]	hypothetical protein lpg1458 [Legionella pneumophila subsp. pneumophila str. Philadelphia 1]	hypothetical protein [Legionella drancourtii]	hypothetical protein [Legionella anisa]	hypothetical protein [Legionella cherrii]	hypothetical protein [Legionella moravica]	hypothetical protein [Legionella longbeachae]	hypothetical protein [Legionella sainthelensi]
WP_025385859.1	lpari_00669	WP_035903677.1	WP_035886262.1	WP_028387885.1	WP_028374144.1	WP_018576611.1	WP_031565610.1	YP_095476.1	WP_040536604.1	WP_019232214.1	WP_028380435.1	WP_028384556.1	WP_003636999.1	WP_027269926.1	pseudouridine synthase [Legionella oakridgensis]	Ribosomal large subunit pseudouridine synthase B	pseudouridine synthase [Legionella geestiana]	pseudouridine synthase [Legionella norrlandica]	pseudouridine synthase [Legionella fairfieldensis]	pseudouridine synthase [Legionella lansingensis]	RNA pseudouridine synthase [Legionella shakespearei]	pseudouridine synthase [Legionella wadsworthii]	pseudouridine synthase [Legionella pneumophila subsp. pneumophila str. Philadelphia 1]	pseudouridine synthase [Legionella drancourtii]	RNA pseudouridine synthase [Legionella anisa]	pseudouridine synthase [Legionella cherrii]	pseudouridine synthase [Legionella moravica]	RNA pseudouridine synthase [Legionella longbeachae]	pseudouridine synthase [Legionella sainthelensi]
WP_025385861.1	lpari_00665	WP_028387142.1	WP_035886273.1	WP_028387881.1	WP_028374140.1	WP_018576607.1	WP_031565601.1	YP_095472.1	WP_006872948.1	WP_019232210.1	WP_028380431.1	WP_028384552.1	WP_003636994.1	WP_027269922.1	hypothetical protein [Legionella oakridgensis]	Threonylcarbamoyl-AMP synthase	hypothetical protein [Legionella geestiana]	hypothetical protein [Legionella norrlandica]	hypothetical protein [Legionella fairfieldensis]	hypothetical protein [Legionella lansingensis]	translation factor Sua5 [Legionella shakespearei]	hypothetical protein [Legionella wadsworthii]	translation factor [Legionella pneumophila subsp. pneumophila str. Philadelphia 1]	translation factor Sua5 [Legionella drancourtii]	translation factor Sua5 [Legionella anisa]	hypothetical protein [Legionella cherrii]	hypothetical protein [Legionella moravica]	translation factor Sua5 [Legionella longbeachae]	hypothetical protein [Legionella sainthelensi]
WP_025385862.1	lpari_00664	WP_028387141.1	WP_035886277.1	WP_028387880.1	WP_028374139.1	WP_018576606.1	WP_031565600.1	YP_095471.1	WP_006872949.1	WP_019232209.1	WP_028380430.1	WP_028384551.1	WP_003636993.1	WP_027269921.1	phosphoesterase [Legionella oakridgensis]	Phosphoribosyl 1,2-cyclic phosphate 1,2-diphosphodiesterase	phosphoesterase [Legionella geestiana]	phosphoesterase [Legionella norrlandica]	phosphoesterase [Legionella fairfieldensis]	phosphoesterase [Legionella lansingensis]	phosphoesterase [Legionella shakespearei]	phosphoesterase [Legionella wadsworthii]	metal dependent phosphoesterase [Legionella pneumophila subsp. pneumophila str. Philadelphia 1]	phosphoesterase [Legionella drancourtii]	phosphoesterase [Legionella anisa]	phosphoesterase [Legionella cherrii]	phosphoesterase [Legionella moravica]	phosphoesterase [Legionella longbeachae]	phosphoesterase [Legionella sainthelensi]
WP_025385864.1	lpari_00662	WP_028387138.1	WP_035886291.1	WP_028387696.1	WP_028373913.1	WP_018576603.1	WP_031565596.1	YP_095469.1	WP_006872954.1	WP_019232207.1	WP_028380429.1	WP_028384549.1	WP_003636991.1	WP_027269920.1	16S rRNA maturation RNase YbeY [Legionella oakridgensis]	Endoribonuclease YbeY	16S rRNA maturation RNase YbeY [Legionella geestiana]	16S rRNA maturation RNase YbeY [Legionella norrlandica]	16S rRNA maturation RNase YbeY [Legionella fairfieldensis]	16S rRNA maturation RNase YbeY [Legionella lansingensis]	16S rRNA maturation RNase YbeY [Legionella shakespearei]	16S rRNA maturation RNase YbeY [Legionella wadsworthii]	metal dependent hydrolase [Legionella pneumophila subsp. pneumophila str. Philadelphia 1]	16S rRNA maturation RNase YbeY [Legionella drancourtii]	16S rRNA maturation RNase YbeY [Legionella anisa]	16S rRNA maturation RNase YbeY [Legionella cherrii]	16S rRNA maturation RNase YbeY [Legionella moravica]	16S rRNA maturation RNase YbeY [Legionella longbeachae]	16S rRNA maturation RNase YbeY [Legionella sainthelensi]
WP_025385865.1	lpari_00661	WP_028387137.1	WP_035886293.1	WP_028387697.1	WP_028373912.1	WP_018576602.1	WP_035899042.1	YP_095468.1	WP_050805600.1	WP_040521901.1	WP_028380428.1	WP_028384548.1	WP_003636990.1	WP_027269919.1	magnesium/cobalt efflux protein CorC [Legionella oakridgensis]	Magnesium and cobalt efflux protein CorC	magnesium/cobalt efflux protein CorC [Legionella geestiana]	magnesium/cobalt efflux protein CorC [Legionella norrlandica]	magnesium/cobalt efflux protein CorC [Legionella fairfieldensis]	magnesium/cobalt efflux protein CorC [Legionella lansingensis]	magnesium transporter [Legionella shakespearei]	magnesium/cobalt efflux protein CorC [Legionella wadsworthii]	Mg2+ and Co2+ transporter CorC [Legionella pneumophila subsp. pneumophila str. Philadelphia 1]	magnesium/cobalt efflux protein CorC [Legionella drancourtii]	magnesium/cobalt efflux protein CorC [Legionella anisa]	magnesium/cobalt efflux protein CorC [Legionella cherrii]	magnesium/cobalt efflux protein CorC [Legionella moravica]	magnesium transporter [Legionella longbeachae]	magnesium/cobalt efflux protein CorC [Legionella sainthelensi]
WP_025385866.1	lpari_00660	WP_028387136.1	WP_035886296.1	WP_035917893.1	WP_028373911.1	WP_018576601.1	WP_031565593.1	YP_095467.1	WP_006872956.1	WP_019232205.1	WP_028380427.1	WP_028384547.1	WP_003636989.1	WP_027269918.1	two-component system response regulator [Legionella oakridgensis]	Transcriptional regulatory protein CpxR	two-component system response regulator [Legionella geestiana]	two-component system response regulator [Legionella norrlandica]	two-component system response regulator, partial [Legionella fairfieldensis]	two-component system response regulator [Legionella lansingensis]	two-component system response regulator [Legionella shakespearei]	two-component system response regulator [Legionella wadsworthii]	transcriptional regulatory protein CpxR [Legionella pneumophila subsp. pneumophila str. Philadelphia 1]	two-component system response regulator [Legionella drancourtii]	two-component system response regulator [Legionella anisa]	two-component system response regulator [Legionella cherrii]	two-component system response regulator [Legionella moravica]	two-component system response regulator [Legionella longbeachae]	two-component system response regulator [Legionella sainthelensi]
WP_025385871.1	lpari_00655	WP_028386353.1	WP_035886303.1	WP_051555246.1	WP_051546218.1	WP_018576595.1	WP_031565584.1	YP_095462.1	WP_006871915.1	WP_019232200.1	WP_028380422.1	WP_028384542.1	WP_003636983.1	WP_027269913.1	hypothetical protein [Legionella oakridgensis]	Deoxyribose-phosphate aldolase	hypothetical protein [Legionella geestiana]	deoxyribose-phosphate aldolase [Legionella norrlandica]	hypothetical protein [Legionella fairfieldensis]	hypothetical protein [Legionella lansingensis]	hypothetical protein [Legionella shakespearei]	deoxyribose-phosphate aldolase [Legionella wadsworthii]	2-deoxyribose-5-phosphate aldolase [Legionella pneumophila subsp. pneumophila str. Philadelphia 1]	deoxyribose-phosphate aldolase [Legionella drancourtii]	hypothetical protein [Legionella anisa]	deoxyribose-phosphate aldolase [Legionella cherrii]	deoxyribose-phosphate aldolase [Legionella moravica]	deoxyribose-phosphate aldolase [Legionella longbeachae]	deoxyribose-phosphate aldolase [Legionella sainthelensi]
WP_025385874.1	lpari_00653	WP_035904050.1	WP_035886315.1	WP_035919030.1	WP_051546221.1	WP_018576592.1	WP_035899092.1	YP_095459.1	WP_040534960.1	WP_040521947.1	WP_035900611.1	WP_028384540.1	WP_003636981.1	WP_035905696.1	4-hydroxybenzoate polyprenyltransferase [Legionella oakridgensis]	4-hydroxybenzoate octaprenyltransferase	4-hydroxybenzoate polyprenyltransferase [Legionella geestiana]	4-hydroxybenzoate polyprenyltransferase [Legionella norrlandica]	4-hydroxybenzoate polyprenyltransferase [Legionella fairfieldensis]	4-hydroxybenzoate polyprenyltransferase [Legionella lansingensis]	hypothetical protein [Legionella shakespearei]	4-hydroxybenzoate polyprenyltransferase [Legionella wadsworthii]	4-hydroxybenzoate polyprenyltransferase [Legionella pneumophila subsp. pneumophila str. Philadelphia 1]	4-hydroxybenzoate polyprenyltransferase [Legionella drancourtii]	4-hydroxybenzoate polyprenyltransferase [Legionella anisa]	4-hydroxybenzoate polyprenyltransferase [Legionella cherrii]	4-hydroxybenzoate polyprenyltransferase [Legionella moravica]	4-hydroxybenzoate polyprenyltransferase [Legionella longbeachae]	4-hydroxybenzoate polyprenyltransferase [Legionella sainthelensi]
WP_025385875.1	lpari_00652	WP_035904034.1	WP_035886318.1	WP_028389488.1	WP_051546216.1	WP_018576591.1	WP_031565579.1	YP_095458.1	WP_006870757.1	WP_019232195.1	WP_028380419.1	WP_035922089.1	WP_003636980.1	WP_027269908.1	hypothetical protein [Legionella oakridgensis]	Chorismate pyruvate-lyase	hypothetical protein [Legionella geestiana]	4-hydroxybenzoate synthetase [Legionella norrlandica]	hypothetical protein [Legionella fairfieldensis]	hypothetical protein [Legionella lansingensis]	hypothetical protein [Legionella shakespearei]	4-hydroxybenzoate synthetase [Legionella wadsworthii]	hypothetical protein lpg1429 [Legionella pneumophila subsp. pneumophila str. Philadelphia 1]	4-hydroxybenzoate synthetase [Legionella drancourtii]	hypothetical protein [Legionella anisa]	4-hydroxybenzoate synthetase [Legionella cherrii]	4-hydroxybenzoate synthetase [Legionella moravica]	4-hydroxybenzoate synthetase [Legionella longbeachae]	4-hydroxybenzoate synthetase [Legionella sainthelensi]
WP_025385877.1	lpari_00651	WP_028387370.1	WP_035886320.1	WP_051555256.1	WP_028373895.1	WP_018576590.1	WP_031565578.1	YP_095457.1	WP_040534949.1	WP_019232194.1	WP_028380418.1	WP_028384537.1	WP_003636979.1	WP_027269907.1	hypothetical protein [Legionella oakridgensis]	hypothetical protein	hypothetical protein [Legionella geestiana]	pilus assembly protein [Legionella norrlandica]	hypothetical protein [Legionella fairfieldensis]	hypothetical protein [Legionella lansingensis]	hypothetical protein [Legionella shakespearei]	pilus assembly protein [Legionella wadsworthii]	Tfp type 4 fimbrial pilin related signal peptide protein [Legionella pneumophila subsp. pneumophila str. Philadelphia 1]	pilus assembly protein [Legionella drancourtii]	hypothetical protein [Legionella anisa]	pilus assembly protein [Legionella cherrii]	hypothetical protein [Legionella moravica]	type IV pilus protein [Legionella longbeachae]	pilus assembly protein [Legionella sainthelensi]
WP_025385878.1	lpari_00649	WP_028386174.1	WP_035886326.1	WP_028387607.1	WP_028374100.1	WP_018576586.1	WP_031565575.1	YP_095454.1	WP_006870762.1	WP_019232191.1	WP_028380416.1	WP_028384532.1	WP_003636973.1	WP_027269905.1	orotidine 5'-phosphate decarboxylase [Legionella oakridgensis]	Orotidine 5'-phosphate decarboxylase	orotidine 5'-phosphate decarboxylase [Legionella geestiana]	orotidine 5'-phosphate decarboxylase [Legionella norrlandica]	orotidine 5'-phosphate decarboxylase [Legionella fairfieldensis]	orotidine 5'-phosphate decarboxylase [Legionella lansingensis]	hypothetical protein [Legionella shakespearei]	orotidine 5'-phosphate decarboxylase [Legionella wadsworthii]	orotidine 5'-phosphate decarboxylase [Legionella pneumophila subsp. pneumophila str. Philadelphia 1]	orotidine 5'-phosphate decarboxylase [Legionella drancourtii]	orotidine 5'-phosphate decarboxylase [Legionella anisa]	orotidine 5'-phosphate decarboxylase [Legionella cherrii]	orotidine 5'-phosphate decarboxylase [Legionella moravica]	orotidine 5'-phosphate decarboxylase [Legionella longbeachae]	orotidine 5'-phosphate decarboxylase [Legionella sainthelensi]
WP_025385880.1	lpari_00645	WP_028386171.1	WP_035886332.1	WP_028387609.1	WP_028374097.1	WP_018576583.1	WP_031565569.1	YP_095451.1	WP_006870765.1	WP_019232188.1	WP_028380413.1	WP_028384529.1	WP_003636970.1	WP_027269902.1	hypothetical protein [Legionella oakridgensis]	Lipopolysaccharide assembly protein A	hypothetical protein [Legionella geestiana]	hypothetical protein [Legionella norrlandica]	hypothetical protein [Legionella fairfieldensis]	hypothetical protein [Legionella lansingensis]	hypothetical protein [Legionella shakespearei]	hypothetical protein [Legionella wadsworthii]	hypothetical protein lpg1422 [Legionella pneumophila subsp. pneumophila str. Philadelphia 1]	hypothetical protein [Legionella drancourtii]	hypothetical protein [Legionella anisa]	hypothetical protein [Legionella cherrii]	hypothetical protein [Legionella moravica]	hypothetical protein [Legionella longbeachae]	hypothetical protein [Legionella sainthelensi]
WP_025385882.1	lpari_00642	WP_028386168.1	WP_035886339.1	WP_035917849.1	WP_035916085.1	WP_018576580.1	WP_035899041.1	YP_095448.1	WP_006870771.1	WP_019232185.1	WP_035900446.1	WP_035922082.1	WP_003636965.1	WP_035905649.1	3-phosphoshikimate 1-carboxyvinyltransferase [Legionella oakridgensis]	3-phosphoshikimate 1-carboxyvinyltransferase	3-phosphoshikimate 1-carboxyvinyltransferase [Legionella geestiana]	3-phosphoshikimate 1-carboxyvinyltransferase [Legionella norrlandica]	3-phosphoshikimate 1-carboxyvinyltransferase [Legionella fairfieldensis]	3-phosphoshikimate 1-carboxyvinyltransferase [Legionella lansingensis]	3-phosphoshikimate 1-carboxyvinyltransferase [Legionella shakespearei]	3-phosphoshikimate 1-carboxyvinyltransferase [Legionella wadsworthii]	3-phosphoshikimate 1-carboxyvinyltransferase [Legionella pneumophila subsp. pneumophila str. Philadelphia 1]	3-phosphoshikimate 1-carboxyvinyltransferase [Legionella drancourtii]	3-phosphoshikimate 1-carboxyvinyltransferase [Legionella anisa]	3-phosphoshikimate 1-carboxyvinyltransferase [Legionella cherrii]	3-phosphoshikimate 1-carboxyvinyltransferase [Legionella moravica]	3-phosphoshikimate 1-carboxyvinyltransferase [Legionella longbeachae]	3-phosphoshikimate 1-carboxyvinyltransferase [Legionella sainthelensi]
WP_025385884.1	lpari_00640	WP_028386166.1	WP_035886346.1	WP_028387614.1	WP_028374253.1	WP_018576578.1	WP_031565561.1	YP_095446.1	WP_006870773.1	WP_019232183.1	WP_028380408.1	WP_028384524.1	WP_003636963.1	WP_027269896.1	DNA gyrase subunit A [Legionella oakridgensis]	DNA gyrase subunit A	DNA gyrase subunit A [Legionella geestiana]	DNA gyrase subunit A [Legionella norrlandica]	DNA gyrase subunit A [Legionella fairfieldensis]	DNA gyrase subunit A, partial [Legionella lansingensis]	DNA gyrase subunit A [Legionella shakespearei]	DNA gyrase subunit A [Legionella wadsworthii]	DNA gyrase subunit A [Legionella pneumophila subsp. pneumophila str. Philadelphia 1]	DNA gyrase subunit A [Legionella drancourtii]	DNA gyrase subunit A [Legionella anisa]	DNA gyrase subunit A [Legionella cherrii]	DNA gyrase subunit A [Legionella moravica]	DNA gyrase subunit A [Legionella longbeachae]	DNA gyrase subunit A [Legionella sainthelensi]
WP_025385885.1	lpari_00639	WP_028386165.1	WP_035886351.1	WP_028387616.1	WP_028374246.1	WP_018576577.1	WP_031565559.1	YP_095444.1	WP_006870774.1	WP_019232182.1	WP_028380407.1	WP_028384523.1	WP_003636961.1	WP_027269895.1	type II citrate synthase [Legionella oakridgensis]	Citrate synthase	type II citrate synthase [Legionella geestiana]	type II citrate synthase [Legionella norrlandica]	type II citrate synthase [Legionella fairfieldensis]	type II citrate synthase [Legionella lansingensis]	type II citrate synthase [Legionella shakespearei]	type II citrate synthase [Legionella wadsworthii]	citrate synthase [Legionella pneumophila subsp. pneumophila str. Philadelphia 1]	type II citrate synthase [Legionella drancourtii]	type II citrate synthase [Legionella anisa]	type II citrate synthase [Legionella cherrii]	type II citrate synthase [Legionella moravica]	type II citrate synthase [Legionella longbeachae]	type II citrate synthase [Legionella sainthelensi]
WP_025385887.1	lpari_00636	WP_028386162.1	WP_035886360.1	WP_028387619.1	WP_028374046.1	WP_018576574.1	WP_031565552.1	YP_095441.1	WP_006870777.1	WP_019232180.1	WP_028380404.1	WP_028384518.1	WP_003631729.1	WP_027269762.1	thioredoxin [Legionella oakridgensis]	Putative thioredoxin-2	thioredoxin [Legionella geestiana]	thioredoxin [Legionella norrlandica]	thioredoxin [Legionella fairfieldensis]	thioredoxin [Legionella lansingensis]	thioredoxin [Legionella shakespearei]	thioredoxin [Legionella wadsworthii]	thioredoxin [Legionella pneumophila subsp. pneumophila str. Philadelphia 1]	thioredoxin [Legionella drancourtii]	thioredoxin [Legionella anisa]	thioredoxin [Legionella cherrii]	thioredoxin [Legionella moravica]	thioredoxin [Legionella longbeachae]	thioredoxin [Legionella sainthelensi]
WP_025385889.1	lpari_00634	WP_051550850.1	WP_052117502.1	WP_028387621.1	WP_028374044.1	WP_018576572.1	WP_031565549.1	YP_095439.1	WP_040534951.1	WP_040521943.1	WP_051544430.1	WP_028384516.1	WP_003631732.1	WP_027269760.1	hypothetical protein [Legionella oakridgensis]	hypothetical protein	hypothetical protein [Legionella geestiana]	hypothetical protein [Legionella norrlandica]	hypothetical protein [Legionella fairfieldensis]	hypothetical protein [Legionella lansingensis]	membrane protein [Legionella shakespearei]	hypothetical protein [Legionella wadsworthii]	hypothetical protein lpg1410 [Legionella pneumophila subsp. pneumophila str. Philadelphia 1]	lipoprotein [Legionella drancourtii]	lipoprotein [Legionella anisa]	hypothetical protein [Legionella cherrii]	hypothetical protein [Legionella moravica]	membrane protein [Legionella longbeachae]	hypothetical protein [Legionella sainthelensi]
WP_025385890.1	lpari_00633	WP_028387334.1	WP_035886365.1	WP_028387622.1	WP_028374043.1	WP_018576571.1	WP_031565547.1	YP_095438.1	WP_006870781.1	WP_019232177.1	WP_028380401.1	WP_028384515.1	WP_003631733.1	WP_027269757.1	3'-5' exonuclease [Legionella oakridgensis]	hypothetical protein	3'-5' exonuclease [Legionella geestiana]	3'-5' exonuclease [Legionella norrlandica]	3'-5' exonuclease [Legionella fairfieldensis]	3'-5' exonuclease [Legionella lansingensis]	3'-5' exonuclease [Legionella shakespearei]	3'-5' exonuclease [Legionella wadsworthii]	hypothetical protein lpg1409 [Legionella pneumophila subsp. pneumophila str. Philadelphia 1]	3'-5' exonuclease [Legionella drancourtii]	3'-5' exonuclease [Legionella anisa]	3'-5' exonuclease [Legionella cherrii]	3'-5' exonuclease [Legionella moravica]	3'-5' exonuclease [Legionella longbeachae]	3'-5' exonuclease [Legionella sainthelensi]
WP_025385891.1	lpari_00453	WP_028387351.1	WP_035886077.1	WP_028387626.1	WP_028374041.1	WP_026254063.1	WP_031565638.1	YP_095530.1	WP_006872927.1	WP_040521951.1	WP_028380449.1	WP_028384621.1	WP_003637015.1	WP_027269940.1	GCN5 family acetyltransferase [Legionella oakridgensis]	Mycothiol acetyltransferase	hypothetical protein [Legionella geestiana]	GCN5 family acetyltransferase [Legionella norrlandica]	GCN5 family acetyltransferase [Legionella fairfieldensis]	GCN5 family acetyltransferase [Legionella lansingensis]	GCN5 family acetyltransferase [Legionella shakespearei]	GCN5 family acetyltransferase [Legionella wadsworthii]	N-acetyltransferase [Legionella pneumophila subsp. pneumophila str. Philadelphia 1]	GCN5 family N-acetyltransferase [Legionella drancourtii]	GCN5 family acetyltransferase [Legionella anisa]	GCN5 family acetyltransferase [Legionella cherrii]	GCN5 family acetyltransferase [Legionella moravica]	GCN5 family N-acetyltransferase [Legionella longbeachae]	GCN5 family acetyltransferase [Legionella sainthelensi]
WP_025385894.1	lpari_00449	WP_028387354.1	WP_035886086.1	WP_028387629.1	WP_028374038.1	WP_018578722.1	WP_031565633.1	YP_095533.1	WP_006872931.1	WP_019232225.1	WP_028380446.1	WP_028384624.1	WP_003637012.1	WP_027269937.1	pyruvate dehydrogenase [Legionella oakridgensis]	Pyruvate dehydrogenase E1 component	pyruvate dehydrogenase [Legionella geestiana]	pyruvate dehydrogenase [Legionella norrlandica]	pyruvate dehydrogenase [Legionella fairfieldensis]	pyruvate dehydrogenase [Legionella lansingensis]	pyruvate dehydrogenase [Legionella shakespearei]	pyruvate dehydrogenase [Legionella wadsworthii]	pyruvate dehydrogenase subunit E1 [Legionella pneumophila subsp. pneumophila str. Philadelphia 1]	pyruvate dehydrogenase [Legionella drancourtii]	pyruvate dehydrogenase [Legionella anisa]	pyruvate dehydrogenase [Legionella cherrii]	pyruvate dehydrogenase [Legionella moravica]	pyruvate dehydrogenase [Legionella longbeachae]	pyruvate dehydrogenase [Legionella sainthelensi]
WP_025385896.1	lpari_00678	WP_028387355.1	WP_035886089.1	WP_028387630.1	WP_028374037.1	WP_018578723.1	WP_031565629.1	YP_095535.1	WP_006872932.1	WP_019232223.1	WP_028380444.1	WP_028384626.1	WP_003637010.1	WP_027269935.1	membrane protein [Legionella oakridgensis]	hypothetical protein	hypothetical protein [Legionella geestiana]	membrane protein [Legionella norrlandica]	membrane protein [Legionella fairfieldensis]	membrane protein [Legionella lansingensis]	hypothetical protein [Legionella shakespearei]	membrane protein [Legionella wadsworthii]	inner membrane protein AmpE [Legionella pneumophila subsp. pneumophila str. Philadelphia 1]	membrane protein [Legionella drancourtii]	membrane protein [Legionella anisa]	membrane protein [Legionella cherrii]	membrane protein [Legionella moravica]	membrane protein [Legionella longbeachae]	membrane protein [Legionella sainthelensi]
WP_025385897.1	lpari_00677	WP_028387356.1	WP_035886091.1	WP_028387631.1	WP_028374036.1	WP_018578724.1	WP_031565627.1	YP_095536.1	WP_006872933.1	WP_019232222.1	WP_028380443.1	WP_028384627.1	WP_003637008.1	WP_027269934.1	sodium:hydrogen antiporter [Legionella oakridgensis]	Iron transporter MagA	sodium:hydrogen antiporter [Legionella geestiana]	sodium:hydrogen antiporter [Legionella norrlandica]	sodium:hydrogen antiporter [Legionella fairfieldensis]	sodium:hydrogen antiporter [Legionella lansingensis]	sodium:hydrogen antiporter [Legionella shakespearei]	sodium:hydrogen antiporter [Legionella wadsworthii]	sodium/hydrogen antiporter [Legionella pneumophila subsp. pneumophila str. Philadelphia 1]	sodium:hydrogen antiporter [Legionella drancourtii]	sodium:hydrogen antiporter [Legionella anisa]	sodium:hydrogen antiporter [Legionella cherrii]	sodium:hydrogen antiporter [Legionella moravica]	sodium:hydrogen antiporter [Legionella longbeachae]	sodium:hydrogen antiporter [Legionella sainthelensi]
WP_025385906.1	lpari_01633	WP_051550783.1	WP_035890807.1	WP_035917873.1	WP_028373986.1	WP_018577753.1	WP_035898968.1	YP_096286.1	WP_006870660.1	WP_019234788.1	WP_035900850.1	WP_028384799.1	WP_003632910.1	WP_035905977.1	glycerophosphodiester phosphodiesterase [Legionella oakridgensis]	Glycerophosphoryl diester phosphodiesterase	hypothetical protein [Legionella geestiana]	glycerophosphodiester phosphodiesterase [Legionella norrlandica]	glycerophosphodiester phosphodiesterase [Legionella fairfieldensis]	glycerophosphodiester phosphodiesterase [Legionella lansingensis]	glycerophosphoryl diester phosphodiesterase [Legionella shakespearei]	glycerophosphodiester phosphodiesterase [Legionella wadsworthii]	glycerophosphoryl diester esterase [Legionella pneumophila subsp. pneumophila str. Philadelphia 1]	glycerophosphoryl diester phosphodiesterase [Legionella drancourtii]	glycerophosphoryl diester phosphodiesterase [Legionella anisa]	glycerophosphodiester phosphodiesterase [Legionella cherrii]	glycerophosphodiester phosphodiesterase [Legionella moravica]	glycerophosphoryl diester phosphodiesterase [Legionella longbeachae]	glycerophosphodiester phosphodiesterase [Legionella sainthelensi]
WP_025385907.1	lpari_01634	WP_051551022.1	WP_035890798.1	WP_028387569.1	WP_028373985.1	WP_018577754.1	WP_031563799.1	YP_096287.1	WP_006870659.1	WP_019234787.1	WP_028381169.1	WP_028384800.1	WP_003632911.1	WP_027270795.1	hypothetical protein [Legionella oakridgensis]	hypothetical protein	hypothetical protein [Legionella geestiana]	hypothetical protein [Legionella norrlandica]	hypothetical protein [Legionella fairfieldensis]	hypothetical protein [Legionella lansingensis]	hypothetical protein [Legionella shakespearei]	hypothetical protein [Legionella wadsworthii]	hypothetical protein lpg2275 [Legionella pneumophila subsp. pneumophila str. Philadelphia 1]	hypothetical protein [Legionella drancourtii]	hypothetical protein [Legionella anisa]	hypothetical protein [Legionella cherrii]	hypothetical protein [Legionella moravica]	hypothetical protein [Legionella longbeachae]	hypothetical protein [Legionella sainthelensi]
WP_025385908.1	lpari_01635	WP_028387056.1	WP_035890799.1	WP_028387570.1	WP_028373984.1	WP_018577291.1	WP_031563798.1	YP_096288.1	WP_006870658.1	WP_019234786.1	WP_028381170.1	WP_028384801.1	WP_012978831.1	WP_027270794.1	amino acid dehydrogenase [Legionella oakridgensis]	Leucine dehydrogenase	amino acid dehydrogenase [Legionella geestiana]	amino acid dehydrogenase [Legionella norrlandica]	amino acid dehydrogenase [Legionella fairfieldensis]	amino acid dehydrogenase [Legionella lansingensis]	amino acid dehydrogenase [Legionella shakespearei]	amino acid dehydrogenase [Legionella wadsworthii]	Glu/Leu/Phe/Val dehydrogenase [Legionella pneumophila subsp. pneumophila str. Philadelphia 1]	amino acid dehydrogenase [Legionella drancourtii]	amino acid dehydrogenase [Legionella anisa]	amino acid dehydrogenase [Legionella cherrii]	amino acid dehydrogenase [Legionella moravica]	amino acid dehydrogenase [Legionella longbeachae]	amino acid dehydrogenase [Legionella sainthelensi]
WP_025385910.1	lpari_01638	WP_028387053.1	WP_035890800.1	WP_028387573.1	WP_028373981.1	WP_018577294.1	WP_031563795.1	YP_096291.1	WP_006870655.1	WP_019234783.1	WP_028381174.1	WP_028384804.1	WP_003632916.1	WP_027270791.1	2-keto-4-pentenoate hydratase [Legionella oakridgensis]	hypothetical protein	2-keto-4-pentenoate hydratase [Legionella geestiana]	2-keto-4-pentenoate hydratase [Legionella norrlandica]	2-keto-4-pentenoate hydratase [Legionella fairfieldensis]	2-keto-4-pentenoate hydratase [Legionella lansingensis]	2-keto-4-pentenoate hydratase [Legionella shakespearei]	2-keto-4-pentenoate hydratase [Legionella wadsworthii]	fumarylacetoacetate hydrolase [Legionella pneumophila subsp. pneumophila str. Philadelphia 1]	2-keto-4-pentenoate hydratase [Legionella drancourtii]	2-keto-4-pentenoate hydratase [Legionella anisa]	2-keto-4-pentenoate hydratase [Legionella cherrii]	2-keto-4-pentenoate hydratase [Legionella moravica]	2-keto-4-pentenoate hydratase [Legionella longbeachae]	2-keto-4-pentenoate hydratase [Legionella sainthelensi]
WP_025385911.1	lpari_01639	WP_028387052.1	WP_035890801.1	WP_028387574.1	WP_028373980.1	WP_018577295.1	WP_031563794.1	YP_096292.1	WP_006870654.1	WP_019234782.1	WP_028381175.1	WP_028384805.1	WP_003632917.1	WP_027270790.1	maleylacetoacetate isomerase [Legionella oakridgensis]	Maleylpyruvate isomerase	maleylacetoacetate isomerase [Legionella geestiana]	maleylacetoacetate isomerase [Legionella norrlandica]	maleylacetoacetate isomerase [Legionella fairfieldensis]	maleylacetoacetate isomerase [Legionella lansingensis]	maleylacetoacetate isomerase [Legionella shakespearei]	maleylacetoacetate isomerase [Legionella wadsworthii]	glutathione S-transferase [Legionella pneumophila subsp. pneumophila str. Philadelphia 1]	maleylacetoacetate isomerase [Legionella drancourtii]	maleylacetoacetate isomerase [Legionella anisa]	maleylacetoacetate isomerase [Legionella cherrii]	maleylacetoacetate isomerase [Legionella moravica]	maleylacetoacetate isomerase [Legionella longbeachae]	maleylacetoacetate isomerase [Legionella sainthelensi]
WP_025385914.1	lpari_01641	WP_028387050.1	WP_035890803.1	WP_028387577.1	WP_028373977.1	WP_018577299.1	WP_031563790.1	YP_096294.2	WP_006870652.1	WP_019234779.1	WP_028381177.1	WP_028384807.1	WP_003632920.1	WP_027270787.1	asparaginyl-tRNA synthetase [Legionella oakridgensis]	Asparagine--tRNA ligase	asparaginyl-tRNA synthetase [Legionella geestiana]	asparaginyl-tRNA synthetase [Legionella norrlandica]	asparaginyl-tRNA synthetase [Legionella fairfieldensis]	asparaginyl-tRNA synthetase [Legionella lansingensis]	asparaginyl-tRNA synthetase [Legionella shakespearei]	asparaginyl-tRNA synthetase [Legionella wadsworthii]	asparaginyl-tRNA synthetase [Legionella pneumophila subsp. pneumophila str. Philadelphia 1]	asparaginyl-tRNA synthetase [Legionella drancourtii]	asparaginyl-tRNA synthetase [Legionella anisa]	asparaginyl-tRNA synthetase [Legionella cherrii]	asparaginyl-tRNA synthetase [Legionella moravica]	asparaginyl-tRNA synthetase [Legionella longbeachae]	asparaginyl-tRNA synthetase [Legionella sainthelensi]
WP_025385915.1	lpari_01643	WP_028387043.1	WP_035890805.1	WP_028388680.1	WP_028373970.1	WP_018577301.1	WP_031563788.1	YP_096296.1	WP_006870650.1	WP_019234776.1	WP_028381179.1	WP_028384809.1	WP_003632923.1	WP_027270785.1	lipoprotein ABC transporter ATP-binding protein [Legionella oakridgensis]	Lipoprotein-releasing system ATP-binding protein LolD	lipoprotein ABC transporter ATP-binding protein [Legionella geestiana]	lipoprotein ABC transporter ATP-binding protein [Legionella norrlandica]	lipoprotein ABC transporter ATP-binding protein [Legionella fairfieldensis]	lipoprotein ABC transporter ATP-binding protein [Legionella lansingensis]	ABC transporter ATP-binding protein [Legionella shakespearei]	lipoprotein ABC transporter ATP-binding protein [Legionella wadsworthii]	ABC transporter ATP-binding protein [Legionella pneumophila subsp. pneumophila str. Philadelphia 1]	ABC transporter ATP-binding protein [Legionella drancourtii]	ABC transporter [Legionella anisa]	lipoprotein ABC transporter ATP-binding protein [Legionella cherrii]	lipoprotein ABC transporter ATP-binding protein [Legionella moravica]	ABC transporter ATP-binding protein [Legionella longbeachae]	lipoprotein ABC transporter ATP-binding protein [Legionella sainthelensi]
WP_025385923.1	lpari_00298	WP_028387167.1	WP_035886138.1	WP_028387678.1	WP_028374174.1	WP_018578673.1	WP_031565734.1	YP_095507.1	WP_040536554.1	WP_019232288.1	WP_028380509.1	WP_028384587.1	WP_003637103.1	WP_027270010.1	aspartyl-tRNA synthetase [Legionella oakridgensis]	Aspartate--tRNA(Asp/Asn) ligase	aspartyl-tRNA synthetase [Legionella geestiana]	aspartyl-tRNA synthetase [Legionella norrlandica]	aspartyl-tRNA synthetase [Legionella fairfieldensis]	aspartyl-tRNA synthetase [Legionella lansingensis]	aspartyl-tRNA synthetase [Legionella shakespearei]	aspartyl-tRNA synthetase [Legionella wadsworthii]	aspartyl-tRNA synthetase [Legionella pneumophila subsp. pneumophila str. Philadelphia 1]	aspartyl-tRNA synthetase [Legionella drancourtii]	aspartyl-tRNA synthetase [Legionella anisa]	aspartyl-tRNA synthetase [Legionella cherrii]	aspartyl-tRNA synthetase [Legionella moravica]	aspartyl-tRNA synthetase [Legionella longbeachae]	aspartyl-tRNA synthetase [Legionella sainthelensi]
WP_025385925.1	lpari_00300	WP_028387166.1	WP_035886140.1	WP_028387680.1	WP_028374176.1	WP_018578671.1	WP_031565730.1	YP_095505.1	WP_006872845.1	WP_019232286.1	WP_028380507.1	WP_028384585.1	WP_003637100.1	WP_027270008.1	hypothetical protein [Legionella oakridgensis]	hypothetical protein	hypothetical protein [Legionella geestiana]	FmdB family transcriptional regulator [Legionella norrlandica]	hypothetical protein [Legionella fairfieldensis]	hypothetical protein [Legionella lansingensis]	hypothetical protein [Legionella shakespearei]	hypothetical protein [Legionella wadsworthii]	hypothetical protein lpg1476 [Legionella pneumophila subsp. pneumophila str. Philadelphia 1]	hypothetical protein [Legionella drancourtii]	hypothetical protein [Legionella anisa]	hypothetical protein [Legionella cherrii]	hypothetical protein [Legionella moravica]	hypothetical protein [Legionella longbeachae]	hypothetical protein [Legionella sainthelensi]
WP_025385926.1	lpari_00471	WP_028387165.1	WP_035886150.1	WP_028387682.1	WP_028373353.1	WP_018578669.1	WP_031565672.1	YP_095504.1	WP_006872906.1	WP_019232247.1	WP_028380470.1	WP_028384584.1	WP_003637050.1	WP_027269967.1	ATP-dependent dethiobiotin synthetase BioD [Legionella oakridgensis]	ATP-dependent dethiobiotin synthetase BioD 1	hypothetical protein [Legionella geestiana]	ATP-dependent dethiobiotin synthetase BioD [Legionella norrlandica]	ATP-dependent dethiobiotin synthetase BioD [Legionella fairfieldensis]	ATP-dependent dethiobiotin synthetase BioD [Legionella lansingensis]	hypothetical protein [Legionella shakespearei]	ATP-dependent dethiobiotin synthetase BioD [Legionella wadsworthii]	dethiobiotin synthetase [Legionella pneumophila subsp. pneumophila str. Philadelphia 1]	ATP-dependent dethiobiotin synthetase BioD [Legionella drancourtii]	ATP-dependent dethiobiotin synthetase BioD [Legionella anisa]	ATP-dependent dethiobiotin synthetase BioD [Legionella cherrii]	ATP-dependent dethiobiotin synthetase BioD [Legionella moravica]	ATP-dependent dethiobiotin synthetase BioD [Legionella longbeachae]	ATP-dependent dethiobiotin synthetase BioD [Legionella sainthelensi]
WP_025385928.1	lpari_00469	WP_035903636.1	WP_035886155.1	WP_035917857.1	WP_035915568.1	WP_018578667.1	WP_031565669.1	YP_095502.1	WP_006872908.1	WP_019232245.1	WP_028380468.1	WP_028384582.1	WP_003637048.1	WP_027269965.1	8-amino-7-oxononanoate synthase [Legionella oakridgensis]	8-amino-7-oxononanoate synthase	hypothetical protein [Legionella geestiana]	8-amino-7-oxononanoate synthase [Legionella norrlandica]	8-amino-7-oxononanoate synthase [Legionella fairfieldensis]	8-amino-7-oxononanoate synthase [Legionella lansingensis]	hypothetical protein [Legionella shakespearei]	8-amino-7-oxononanoate synthase [Legionella wadsworthii]	8-amino-7-oxononanoate synthase [Legionella pneumophila subsp. pneumophila str. Philadelphia 1]	8-amino-7-oxononanoate synthase [Legionella drancourtii]	8-amino-7-oxononanoate synthase [Legionella anisa]	8-amino-7-oxononanoate synthase [Legionella cherrii]	8-amino-7-oxononanoate synthase [Legionella moravica]	8-amino-7-oxononanoate synthase [Legionella longbeachae]	8-amino-7-oxononanoate synthase [Legionella sainthelensi]
WP_025385929.1	lpari_00468	WP_028387162.1	WP_035886157.1	WP_028387685.1	WP_051546165.1	WP_018578666.1	WP_031565668.1	YP_095501.1	WP_006872909.1	WP_019232244.1	WP_028380467.1	WP_028384581.1	WP_003637047.1	WP_027269964.1	biotin synthase [Legionella oakridgensis]	Biotin synthase	biotin synthase [Legionella geestiana]	biotin synthase [Legionella norrlandica]	biotin synthase [Legionella fairfieldensis]	biotin synthase [Legionella lansingensis]	biotin synthase [Legionella shakespearei]	biotin synthase [Legionella wadsworthii]	biotin synthase [Legionella pneumophila subsp. pneumophila str. Philadelphia 1]	biotin synthase [Legionella drancourtii]	biotin synthase [Legionella anisa]	biotin synthase [Legionella cherrii]	biotin synthase [Legionella moravica]	biotin synthase [Legionella longbeachae]	biotin synthase [Legionella sainthelensi]
WP_025385931.1	lpari_00465	WP_035903631.1	WP_035886172.1	WP_028387688.1	WP_028373359.1	WP_018578662.1	WP_031565660.1	YP_095496.1	WP_006872913.1	WP_019232240.1	WP_028380463.1	WP_028384577.1	WP_003637043.1	WP_027269960.1	dephospho-CoA kinase [Legionella oakridgensis]	Dephospho-CoA kinase	dephospho-CoA kinase [Legionella geestiana]	dephospho-CoA kinase [Legionella norrlandica]	dephospho-CoA kinase [Legionella fairfieldensis]	dephospho-CoA kinase [Legionella lansingensis]	dephospho-CoA kinase [Legionella shakespearei]	dephospho-CoA kinase [Legionella wadsworthii]	dephospho-CoA kinase [Legionella pneumophila subsp. pneumophila str. Philadelphia 1]	dephospho-CoA kinase [Legionella drancourtii]	dephospho-CoA kinase [Legionella anisa]	dephospho-CoA kinase [Legionella cherrii]	dephospho-CoA kinase [Legionella moravica]	dephospho-CoA kinase [Legionella longbeachae]	dephospho-CoA kinase [Legionella sainthelensi]
WP_025385937.1	lpari_00461	WP_035903629.1	WP_035886191.1	WP_035917975.1	WP_035915577.1	WP_018578656.1	WP_051635530.1	YP_095491.1	WP_040536594.1	WP_040521954.1	WP_035900448.1	WP_035922144.1	WP_035905132.1	WP_035905668.1	tRNA-dihydrouridine synthase [Legionella oakridgensis]	tRNA-dihydrouridine synthase A	tRNA-dihydrouridine synthase [Legionella geestiana]	tRNA-dihydrouridine synthase [Legionella norrlandica]	tRNA-dihydrouridine synthase [Legionella fairfieldensis]	tRNA-dihydrouridine synthase [Legionella lansingensis]	hypothetical protein [Legionella shakespearei]	tRNA-dihydrouridine synthase [Legionella wadsworthii]	tRNA-dihydrouridine synthase A [Legionella pneumophila subsp. pneumophila str. Philadelphia 1]	tRNA-dihydrouridine synthase [Legionella drancourtii]	tRNA-dihydrouridine synthase [Legionella anisa]	tRNA-dihydrouridine synthase [Legionella cherrii]	tRNA-dihydrouridine synthase [Legionella moravica]	tRNA-dihydrouridine synthase [Legionella longbeachae]	tRNA-dihydrouridine synthase [Legionella sainthelensi]
WP_025385939.1	lpari_01748	WP_028385764.1	WP_035890426.1	WP_028389050.1	WP_028373549.1	WP_018576996.1	WP_031565349.1	YP_095246.1	WP_006869615.1	WP_019232055.1	WP_028380288.1	WP_028384126.1	WP_003631950.1	WP_027271665.1	coproporphyrinogen III oxidase [Legionella oakridgensis]	Oxygen-dependent coproporphyrinogen-III oxidase	coproporphyrinogen III oxidase [Legionella geestiana]	coproporphyrinogen III oxidase [Legionella norrlandica]	coproporphyrinogen III oxidase [Legionella fairfieldensis]	coproporphyrinogen III oxidase [Legionella lansingensis]	coproporphyrinogen III oxidase [Legionella shakespearei]	coproporphyrinogen III oxidase [Legionella wadsworthii]	coproporphyrinogen III oxidase [Legionella pneumophila subsp. pneumophila str. Philadelphia 1]	coproporphyrinogen III oxidase [Legionella drancourtii]	coproporphyrinogen III oxidase [Legionella anisa]	coproporphyrinogen III oxidase [Legionella cherrii]	coproporphyrinogen III oxidase [Legionella moravica]	coproporphyrinogen III oxidase [Legionella longbeachae]	coproporphyrinogen III oxidase [Legionella sainthelensi]
WP_025385943.1	lpari_03208,lpari_02770	WP_028386159.1	WP_035887071.1	WP_028389047.1	WP_028374385.1	WP_018577457.1	WP_031567896.1	YP_094937.1	WP_040534405.1	WP_019234996.1,WP_019233736.1	WP_028382216.1	WP_028385208.1	WP_012978903.1	WP_027270982.1	peptidase [Legionella oakridgensis]	NA	peptidase [Legionella geestiana]	peptidase [Legionella norrlandica]	peptidase [Legionella fairfieldensis]	peptidase [Legionella lansingensis]	peptidase [Legionella shakespearei]	peptidase [Legionella wadsworthii]	DegP protease [Legionella pneumophila subsp. pneumophila str. Philadelphia 1]	peptidase [Legionella drancourtii]	NA	peptidase [Legionella cherrii]	peptidase [Legionella moravica]	peptidase [Legionella longbeachae]	peptidase [Legionella sainthelensi]
WP_025385945.1	lpari_02772	WP_028387090.1	WP_035887064.1	WP_028389046.1	WP_028374393.1	WP_018577460.1	WP_031567899.1	YP_094935.1	WP_006869821.1	WP_019233738.1	WP_028382218.1	WP_028385205.1	WP_003632510.1	WP_027270983.1	hypothetical protein [Legionella oakridgensis]	hypothetical protein	hypothetical protein [Legionella geestiana]	hypothetical protein [Legionella norrlandica]	hypothetical protein [Legionella fairfieldensis]	hypothetical protein [Legionella lansingensis]	hypothetical protein [Legionella shakespearei]	hypothetical protein [Legionella wadsworthii]	hypothetical protein lpg0901 [Legionella pneumophila subsp. pneumophila str. Philadelphia 1]	hypothetical protein [Legionella drancourtii]	hypothetical protein [Legionella anisa]	hypothetical protein [Legionella cherrii]	hypothetical protein [Legionella moravica]	hypothetical protein [Legionella longbeachae]	hypothetical protein [Legionella sainthelensi]
WP_025385952.1	lpari_02776	WP_051550904.1	WP_035887055.1	WP_035918238.1	WP_028374398.1	WP_018577465.1	WP_031567904.1	YP_094929.1	WP_006869817.1	WP_019233742.1	WP_028382221.1	WP_028385199.1	WP_003632515.1	WP_027270985.1	hypothetical protein [Legionella oakridgensis]	hypothetical protein	hypothetical protein [Legionella geestiana]	general secretion pathway protein GspC [Legionella norrlandica]	hypothetical protein [Legionella fairfieldensis]	hypothetical protein [Legionella lansingensis]	hypothetical protein [Legionella shakespearei]	general secretion pathway protein GspC [Legionella wadsworthii]	hypothetical protein lpg0895 [Legionella pneumophila subsp. pneumophila str. Philadelphia 1]	general secretion pathway protein GspC [Legionella drancourtii]	general secretion pathway protein GspC [Legionella anisa]	general secretion pathway protein GspC [Legionella cherrii]	general secretion pathway protein GspC [Legionella moravica]	general secretion pathway protein GspC [Legionella longbeachae]	general secretion pathway protein GspC [Legionella sainthelensi]
[truncated: 4,852 more rows]
