# Supplementary material for: Legionella shows a diverse secondary metabolism dependent on a broad spectrum Sfp-type phosphopantetheinyl transferase
Source: PeerJ. 2016 Nov 24;4:e2720. doi: 10.7717/peerj.2720 (PMC5126622; doi:10.7717/peerj.2720)
Supplement: Supplemental Information 2 — Coding sequences mentioned in the text and the respective orthologs in each Legionella strain, where present. [file peerj-04-2720-s002.xlsx]

## Sheet: Sheet1
Annotation	Legionella oakridgensis	Legionella parisiensis	Legionella geestiana	Legionella norrlandica	Legionella fairfieldensis	Legionella lansingensis	Legionella shakespearei	Legionella wadworthii	Legionella pneumophila	Legionella drancourtii	Legionella anisa	Legionella cherii	Legionella moravica	Legionella longbeacheae	Legionella sainthelensis
Predicted drug transporters
MexH family multidrug efflux RND transporter periplasmic adaptor subunit	WP_035893516.1	lpari_02800	WP_028386309.1	WP_035888856.1	WP_028387753.1	WP_028373879.1	WP_018577652.1	WP_031567947.1	YP_094757.1	WP_006870875.1	WP_019233766.1	WP_028382244.1	WP_028384743.1	WP_003632540.1	WP_027271007.1
multidrug DMT transporter permease	WP_025385442.1	lpari_01074	*	WP_035887121.1	WP_028389583.1	WP_028372860.1	WP_026253844.1	WP_031565075.1	YP_094973.1	WP_006870443.1	WP_019235115.1	WP_028380153.1	WP_028385547.1	WP_003636832.1	WP_027272165.1
MexE family multidrug efflux RND transporter periplasmic adaptor subunit	WP_025385661.1	lpari_03010	WP_028387304.1	WP_035886992.1	*	WP_035915994.1	WP_040524403.1	WP_035899150.1	YP_096520.1	WP_040534531.1	WP_051045691.1	WP_051544473.1	WP_028383501.1	WP_003633934.1	WP_027270451.1
Multidrug transporter MdfA	*	lpari_00631	WP_028387502.1	WP_035886369.1	WP_028389587.1	WP_028372681.1	WP_018576569.1	WP_031565543.1	YP_095434.1	WP_006871637.1	WP_019232174.1	WP_028380399.1	WP_028384514.1	WP_003631735.1	WP_027269755.1
Bcr/CflA family drug resistance efflux transporter	WP_025386482.1	lpari_01307	*	WP_035887567.1	WP_028388725.1	*	WP_018577351.1	WP_031564293.1	YP_096246.1	*	WP_019232957.1	WP_028379759.1	WP_028384111.1	WP_003635538.1	WP_027272120.1
multidrug ABC transporter ATP-binding protein	*	lpari_02805,lpari_02207	WP_028386274.1	*	WP_028389592.1	WP_028374129.1	WP_018577688.1	WP_031563427.1,WP_031563951.1	*	WP_006869108.1	WP_019235161.1	WP_028381315.1,WP_028382651.1	WP_028383712.1	WP_003636193.1,WP_003633141.1	WP_027272681.1
Efflux pump membrane transporter BepE	*	lpari_02801	WP_028386310.1	WP_035888855.1	WP_051555077.1	WP_028373878.1	WP_018577653.1	WP_031567950.1	YP_094756.1	WP_006870874.1	WP_019233767.1	WP_028382245.1	WP_028384744.1	WP_003632541.1	WP_027271008.1
multidrug transporter	WP_025385573.1	lpari_03378	WP_028385681.1	*	*	*	WP_018578640.1	WP_031567094.1	YP_095483.1	WP_006872588.1	WP_040522186.1	WP_028382508.1	*	WP_012978763.1	WP_027272494.1
multidrug transporter	*	lpari_03084	*	WP_035891475.1	WP_028389009.1	WP_028373218.1	WP_018577248.1	WP_031563861.1	YP_094594.1	*	WP_019234202.1	*	*	WP_003634490.1	WP_027271897.1
Multidrug resistance protein MdtC	WP_052335857.1	lpari_00138	WP_028386930.1	*	*	WP_028373637.1	*	WP_031563488.1	*	*	WP_019233470.1	*	WP_028384282.1	WP_003635107.1	WP_027269581.1
Putative multidrug export ATP-binding/permease protein	*	lpari_02923	*	WP_035887570.1	WP_028388493.1	*	WP_018575733.1	WP_031564614.1	YP_095307.1,YP_096249.1	*	WP_019234398.1	*	WP_028384148.1,WP_028384349.1	WP_003631822.1	*
Toluene efflux pump periplasmic linker protein TtgA	*	lpari_02311	*	*	WP_035917838.1	*	*	WP_035898955.1	*	WP_040536291.1	WP_040522532.1	WP_035900936.1	*	WP_003632993.1	WP_035905971.1
Multidrug resistance protein D	*	lpari_00217	*	*	*	*	*	WP_031563649.1	*	WP_006870816.1	WP_019233552.1	WP_028380992.1	*	WP_003635264.1	WP_027269651.1
Multidrug export protein EmrA	*	lpari_02051	*	*	*	WP_028373421.1	*	WP_031567266.1	*	*	WP_019233153.1	WP_028381901.1	*	WP_003632117.1	WP_027270313.1
multidrug efflux protein, outer membrane component	*	lpari_00020	*	*	*	*	*	*	YP_094280.1	*	WP_019233951.1,WP_019233275.1	WP_028381660.1	WP_051190581.1	WP_003636553.1	WP_027272253.1
Multidrug export protein EmrB	*	lpari_03802	*	*	*	*	*	WP_031563369.1	*	WP_006872287.1	*	WP_028381347.1	*	WP_003633004.1	WP_027270730.1
ABC transporter transmembrane permease,permeases of drug/metabolite transporter type	*	*	WP_028387347.1	WP_035888510.1	*	WP_035915695.1	WP_026253807.1	*	YP_095874.1	*	*	*	WP_028383095.1	*	*
multidrug resistance protein	*	*	*	*	*	*	*	*	YP_094116.1	*	WP_019233975.1	WP_028381293.1	WP_035921291.1	WP_012979542.1	WP_027271860.1
florfenicol efflux pump	*	*	*	*	*	*	WP_018576563.1	WP_031565979.1	YP_096446.1	*	*	*	WP_028384510.1	WP_003635992.1	WP_027271120.1
MexE family multidrug efflux RND transporter periplasmic adaptor subunit	*	*	*	WP_035890911.1	*	WP_028372508.1	WP_026253910.1	*	YP_096189.1	*	*	*	WP_028384988.1	*	*
multidrug efflux RND transporter permease subunit	*	*	*	WP_035890910.1	*	WP_028372509.1	WP_018576948.1	*	YP_096190.1	*	*	*	WP_028384989.1	*	*
Multidrug resistance protein Stp	*	lpari_01390	*	*	*	WP_035915868.1	*	WP_031563466.1	*	*	*	WP_051544448.1	*	*	*
Multidrug resistance protein MdtN	*	lpari_00566	*	*	*	*	*	*	*	*	WP_019233032.1	*	*	WP_012979518.1	WP_027272613.1
Legionella quorum sensing genes
lqsR	*	lpari_01277	*	WP_035889245.1	WP_028388657.1,WP_028389657.1	WP_028373207.1	WP_018575956.1	WP_031562507.1	YP_096735.1	WP_006872173.1	WP_019235599.1	*	WP_028383381.1	*	*
hdeD	WP_025386559.1	lpari_00986	WP_035902999.1	WP_035889242.1	WP_028387534.1	WP_028373065.1	WP_018577806.1	WP_031563250.1	YP_096736.1	WP_006872140.1	WP_019234627.1,WP_019234001.1	WP_028379981.1,WP_028380695.1	WP_028383382.1	WP_003633301.1	WP_035905992.1
lqsA	*	*	*	*	*	*	WP_018575957.1	*	YP_096734.1	WP_006872445.1	*	*	WP_035921372.1	*	*
lqsS	*	lpari_03636	*	WP_035887021.1,WP_035891187.1	*	WP_028373208.1	WP_018575954.1	*	YP_096513.1,YP_096737.1	WP_040534287.1	*	*	WP_028383384.1	WP_003632208.1	WP_027271408.1
Isonitrile biosynthesis gene cluster
isnA	*	lpari_01861	*	*	*	WP_051546259.1	WP_018577673.1	WP_031566924.1	YP_094228.1	*	WP_040522170.1	WP_028381693.1	*	WP_003636355.1	WP_027270086.1
isnB	*	lpari_01862	*	WP_035887244.1	*	WP_028374135.1	WP_018577674.1	WP_031566922.1	YP_094229.1	*	WP_019232769.1	WP_028381694.1	*	WP_003636353.1	WP_027270087.1
